# Supplementary material for: Novel carbazolyl–thiazolyl–chromone and carbazolyl–thiazolyl–pyrazole hybrids: synthesis, cytotoxicity evaluation and molecular docking studies
Source: Royal Society of Chemistry journal article supplement (doi:10.1039/d4ra03188a), 2024-01-01
Supplement: d4ra03188a1.pdf [file d4ra03188a1.pdf]

## Supplemental Material

### **Novel Carbazolyl-thiazolyl-chromone and Carbazolyl-thiazolyl-pyrazole Hybrids: Synthesis, Cytotoxicity Evaluation and Molecular Docking Studies**

Noha M. Hassanin<sup>1\*</sup>, Tarik E. Ali<sup>2,3</sup>, Mohammed A. Assiri<sup>3</sup>, and Somaia M. Abdel-Kariem<sup>1</sup>

<sup>1</sup>Department of Chemistry, Faculty of Education, Ain Shams University, Cairo, Egypt

<sup>2</sup>Central Labs, King Khalid University, AlQuraa, Abha, Saudi Arabia

<sup>3</sup>Department of Chemistry, Faculty of Science, King Khalid University, AlQuraa, Abha, Saudi Arabia

\*E-mail: noha-mohamed@edu.asu.edu.eg

**Copies of IR, NMR and MS Spectra for all the synthesized Compounds**

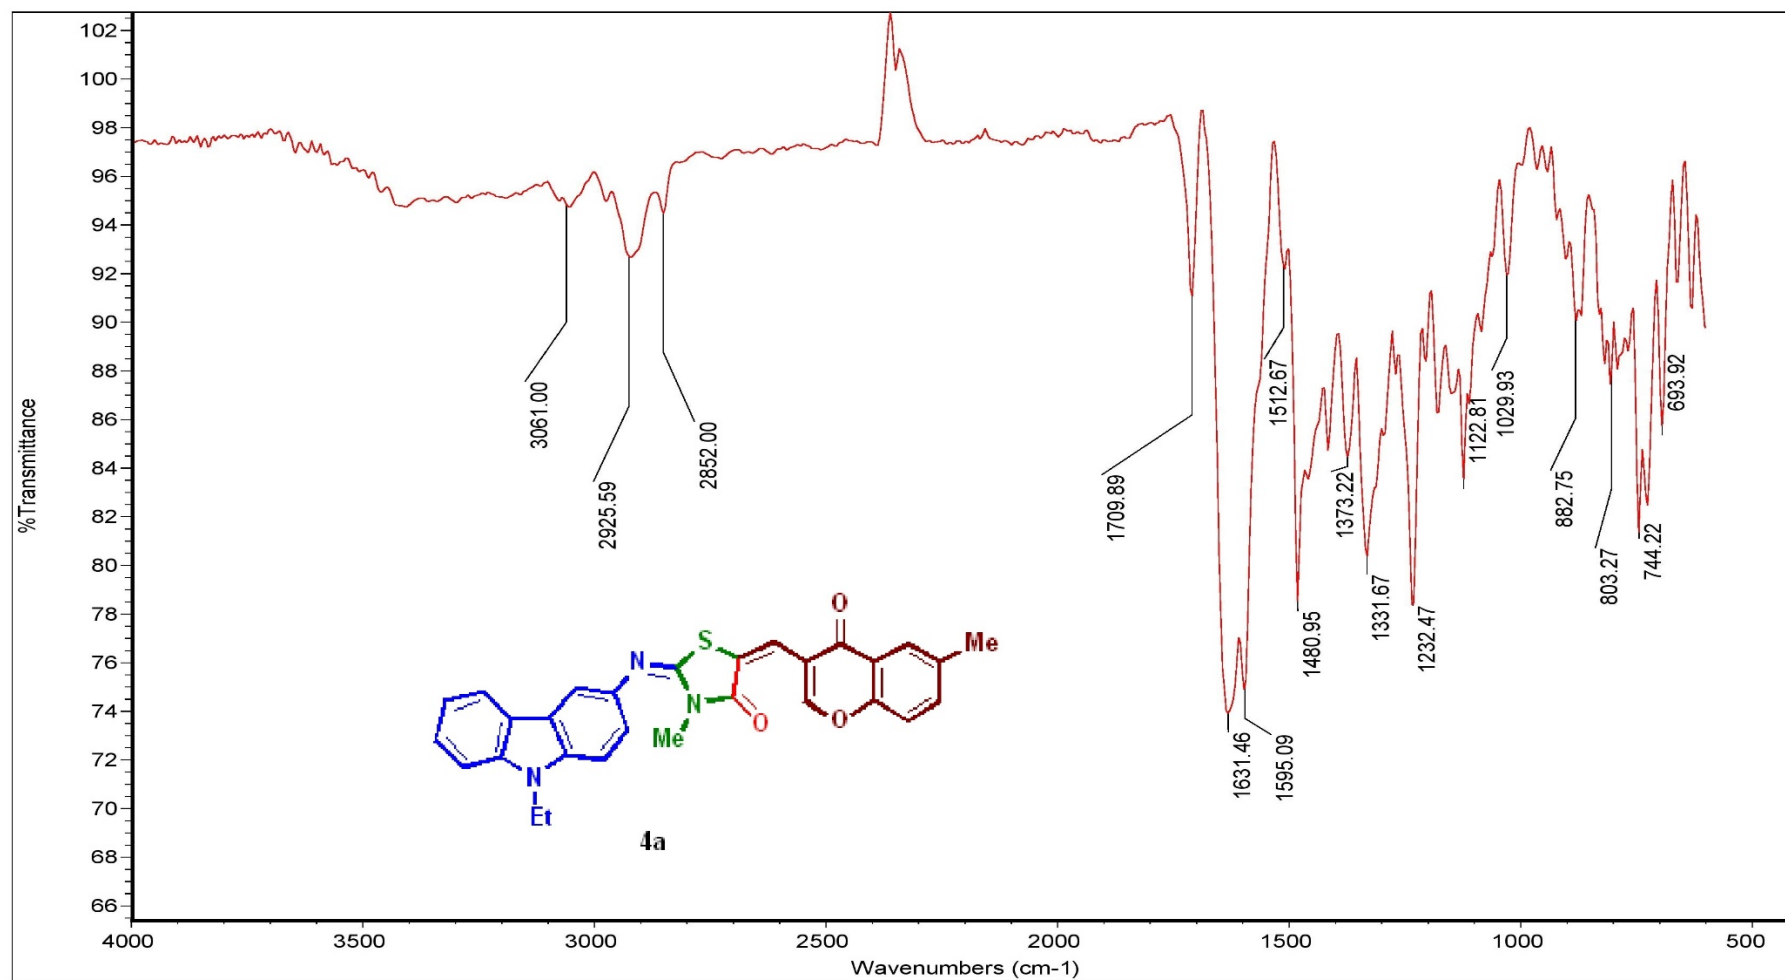

**Figure S1:** The IR spectrum of compound **4a**.

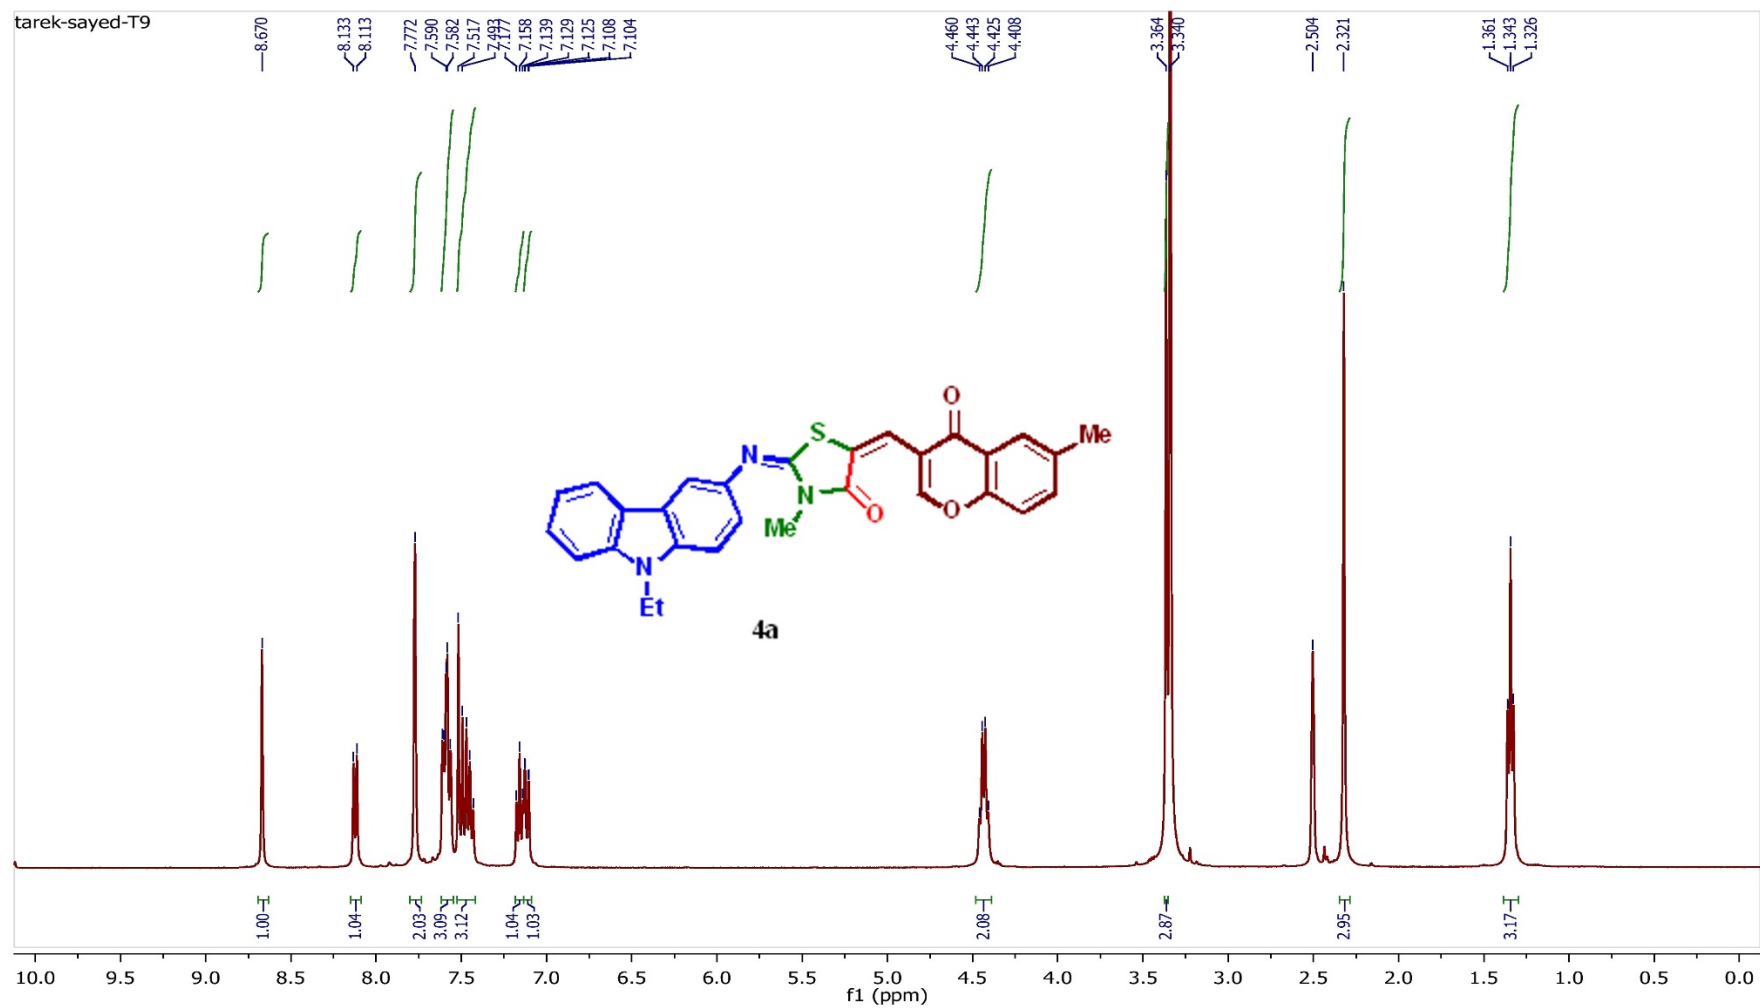

**Figure S2:** The  $^1\text{H}$ -NMR spectrum of compound **4a**.

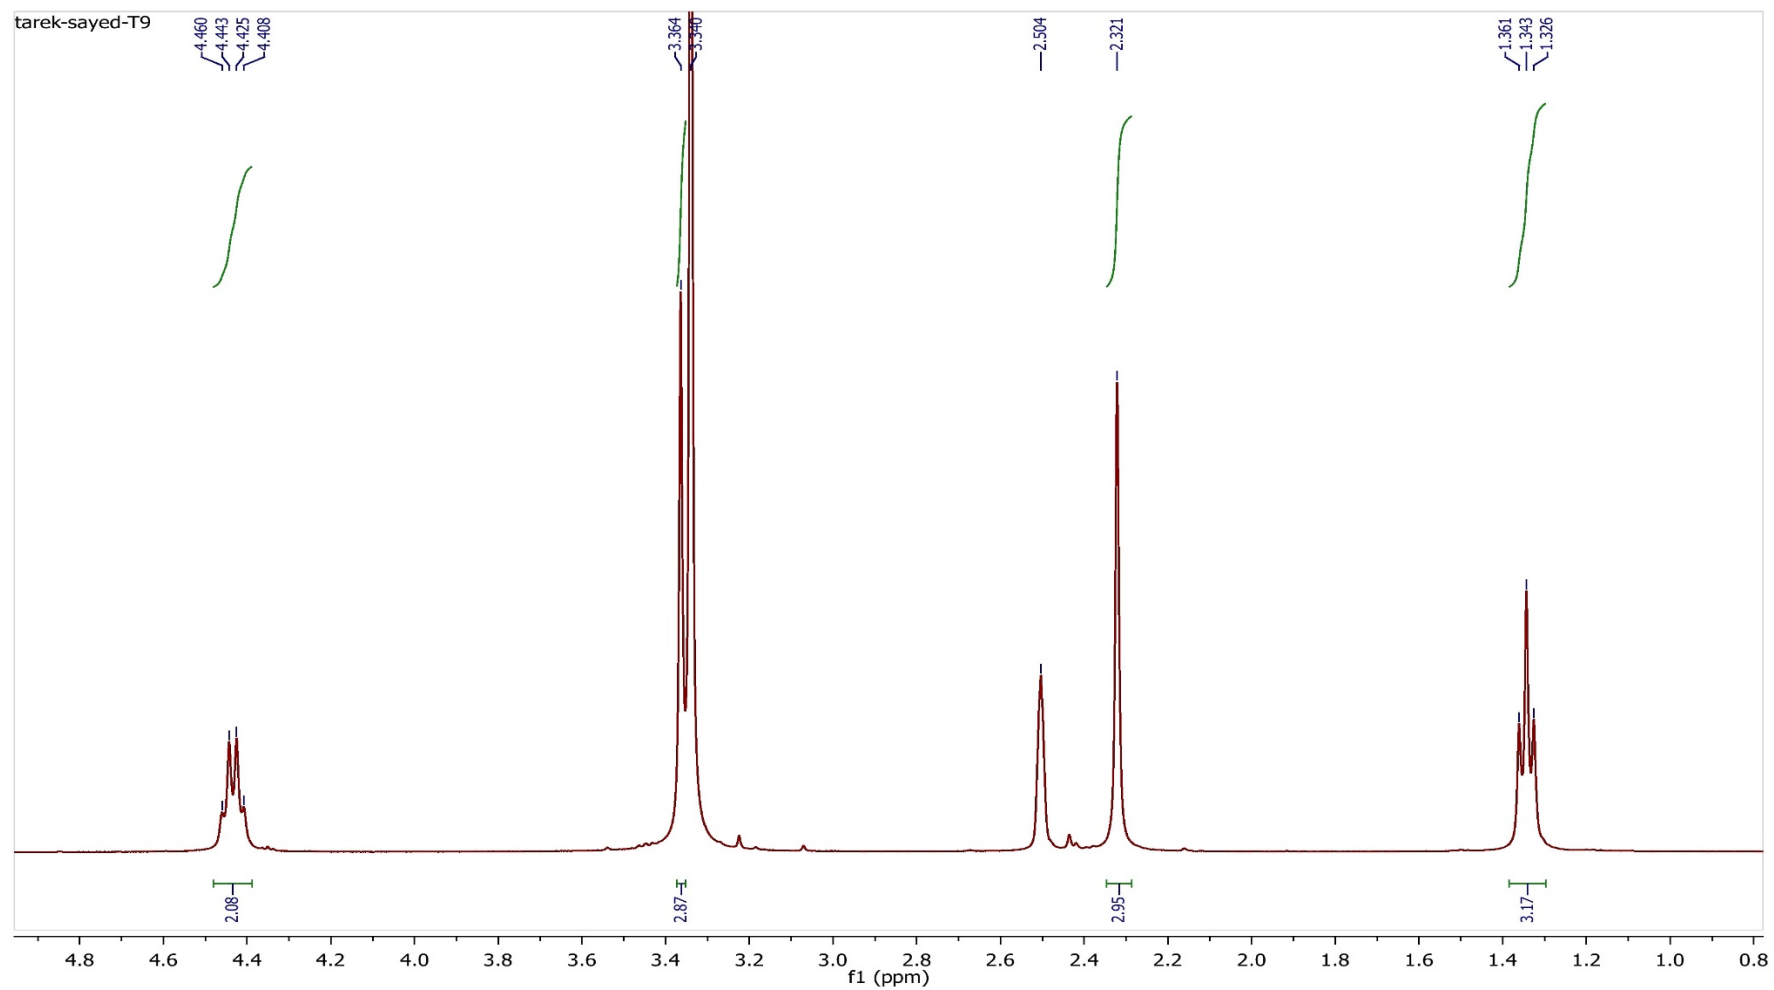

**Figure S3:** The enlargement of upfield region in  $^1\text{H}$ -NMR spectrum of compound **4a**.



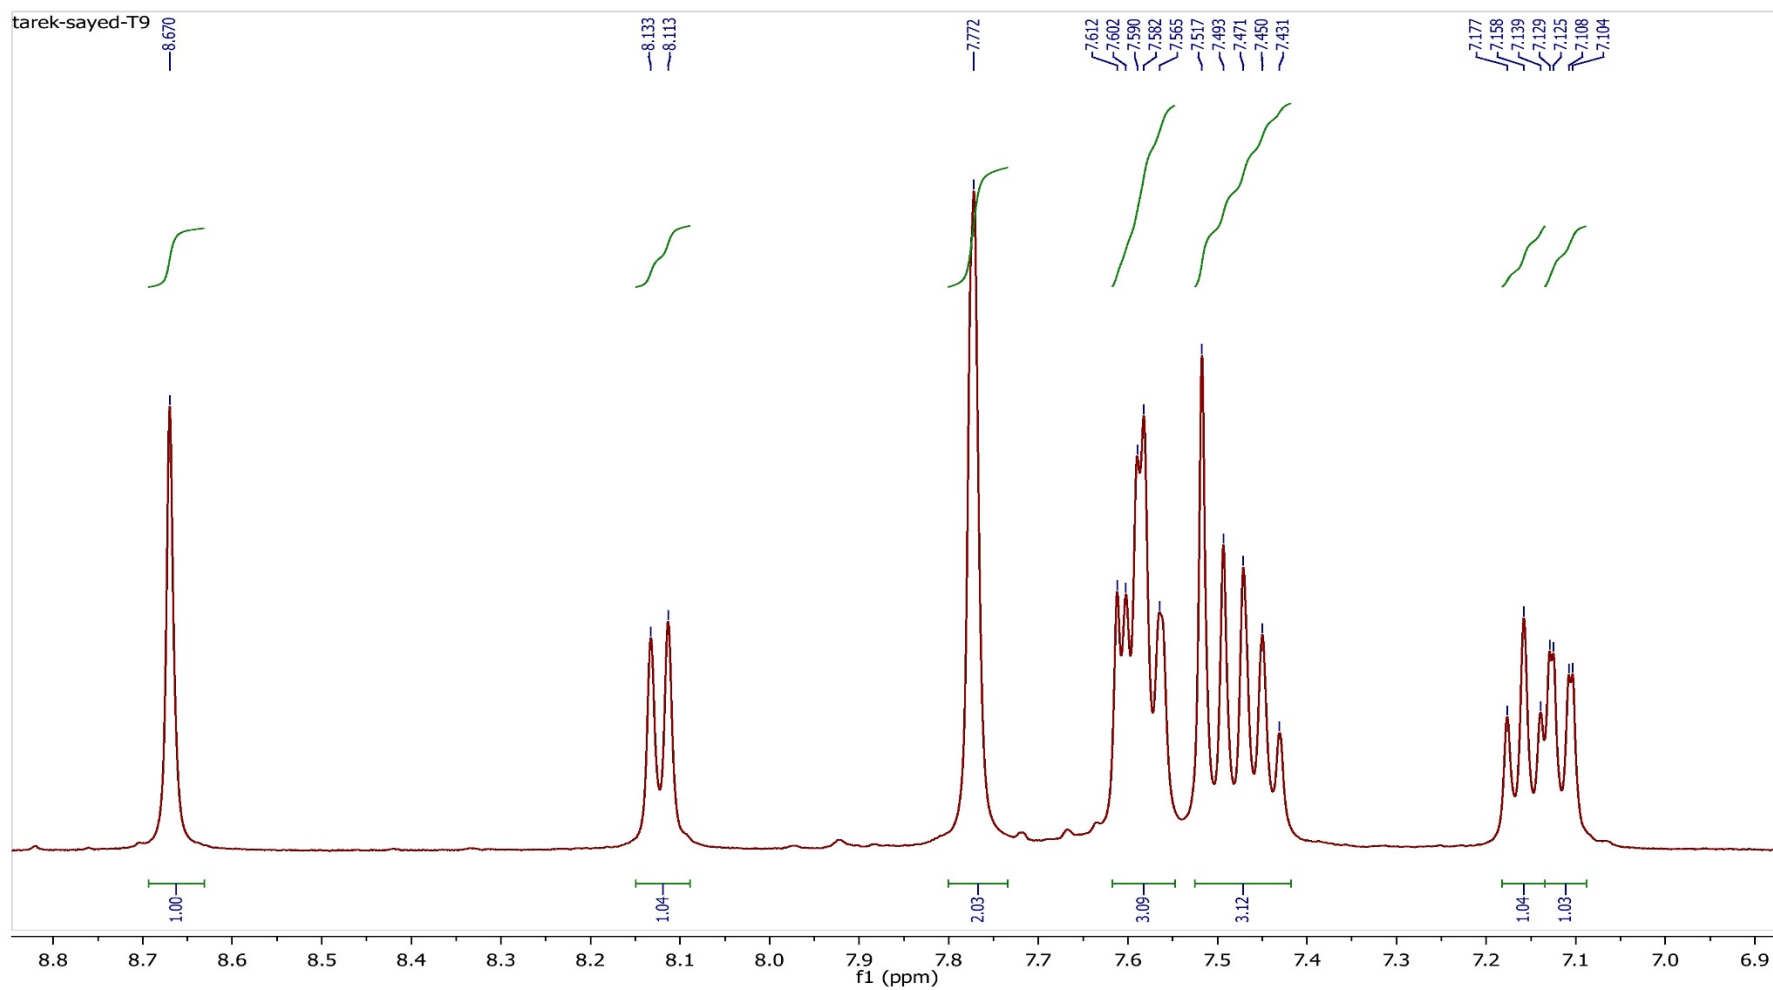

**Figure S4:** The enlargement of downfield region in  $^1\text{H}$ -NMR spectrum of compound **4a**.

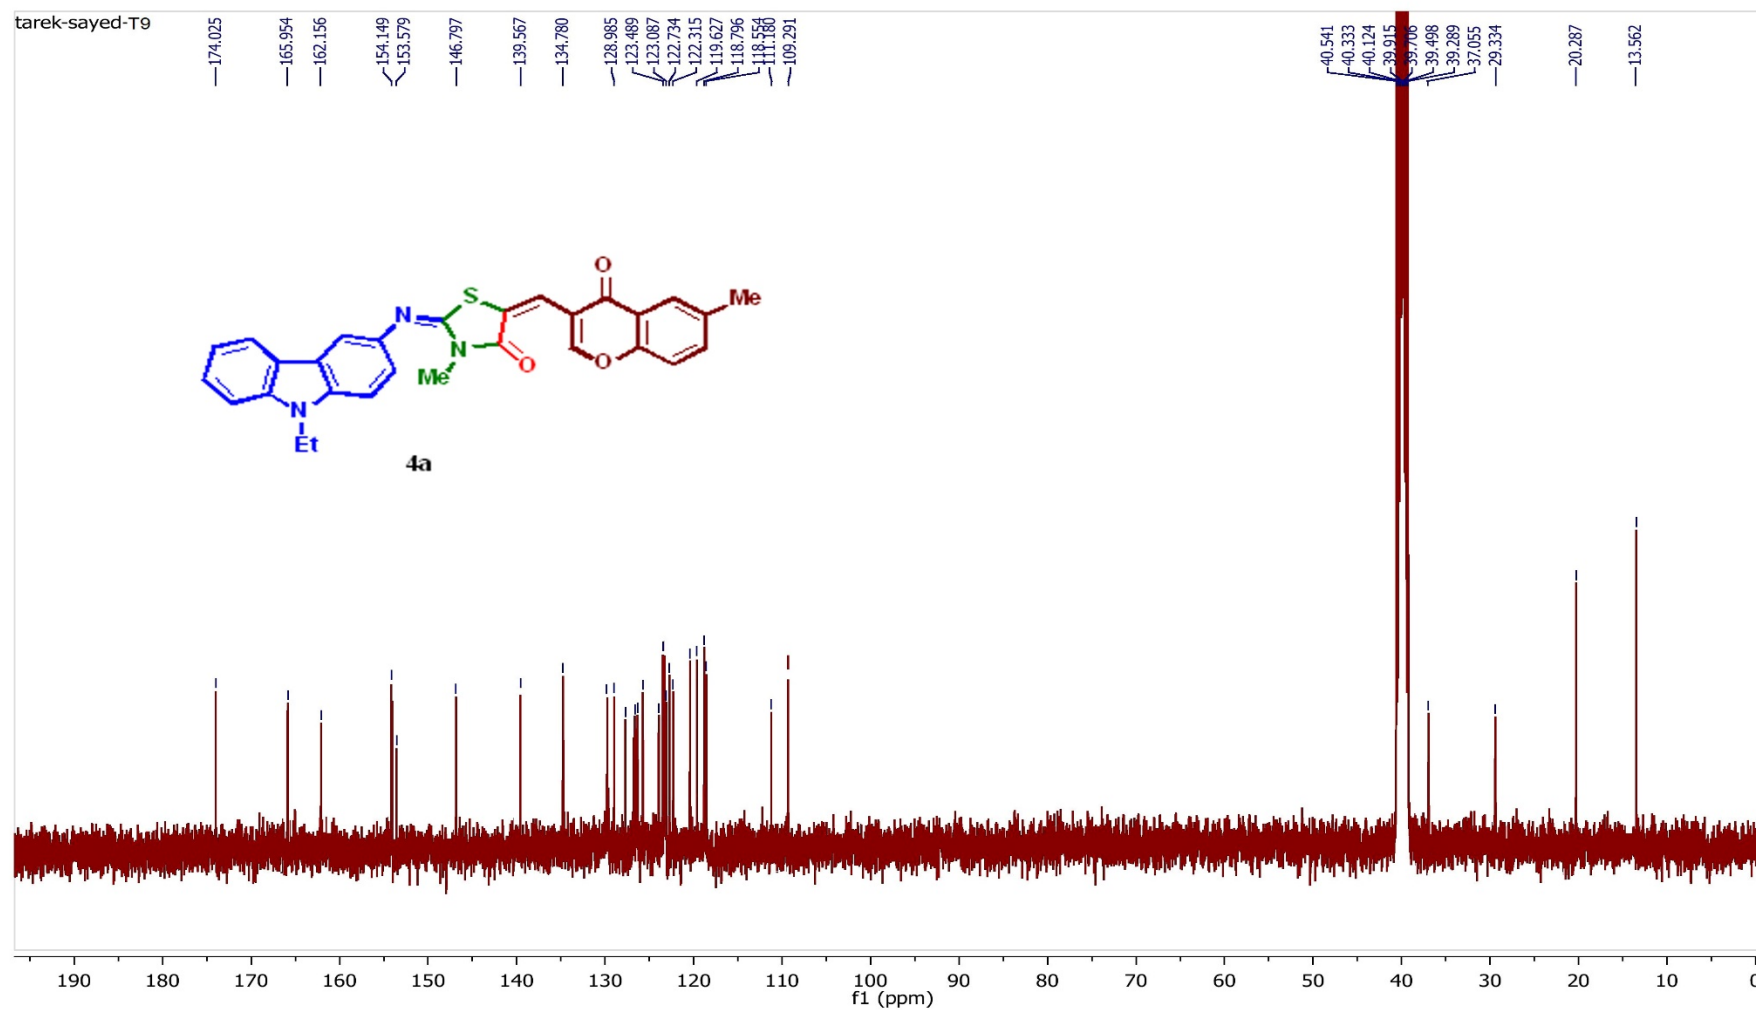

**Figure S5:** The  $^{13}\text{C}$ -NMR spectrum of compound **4a**.

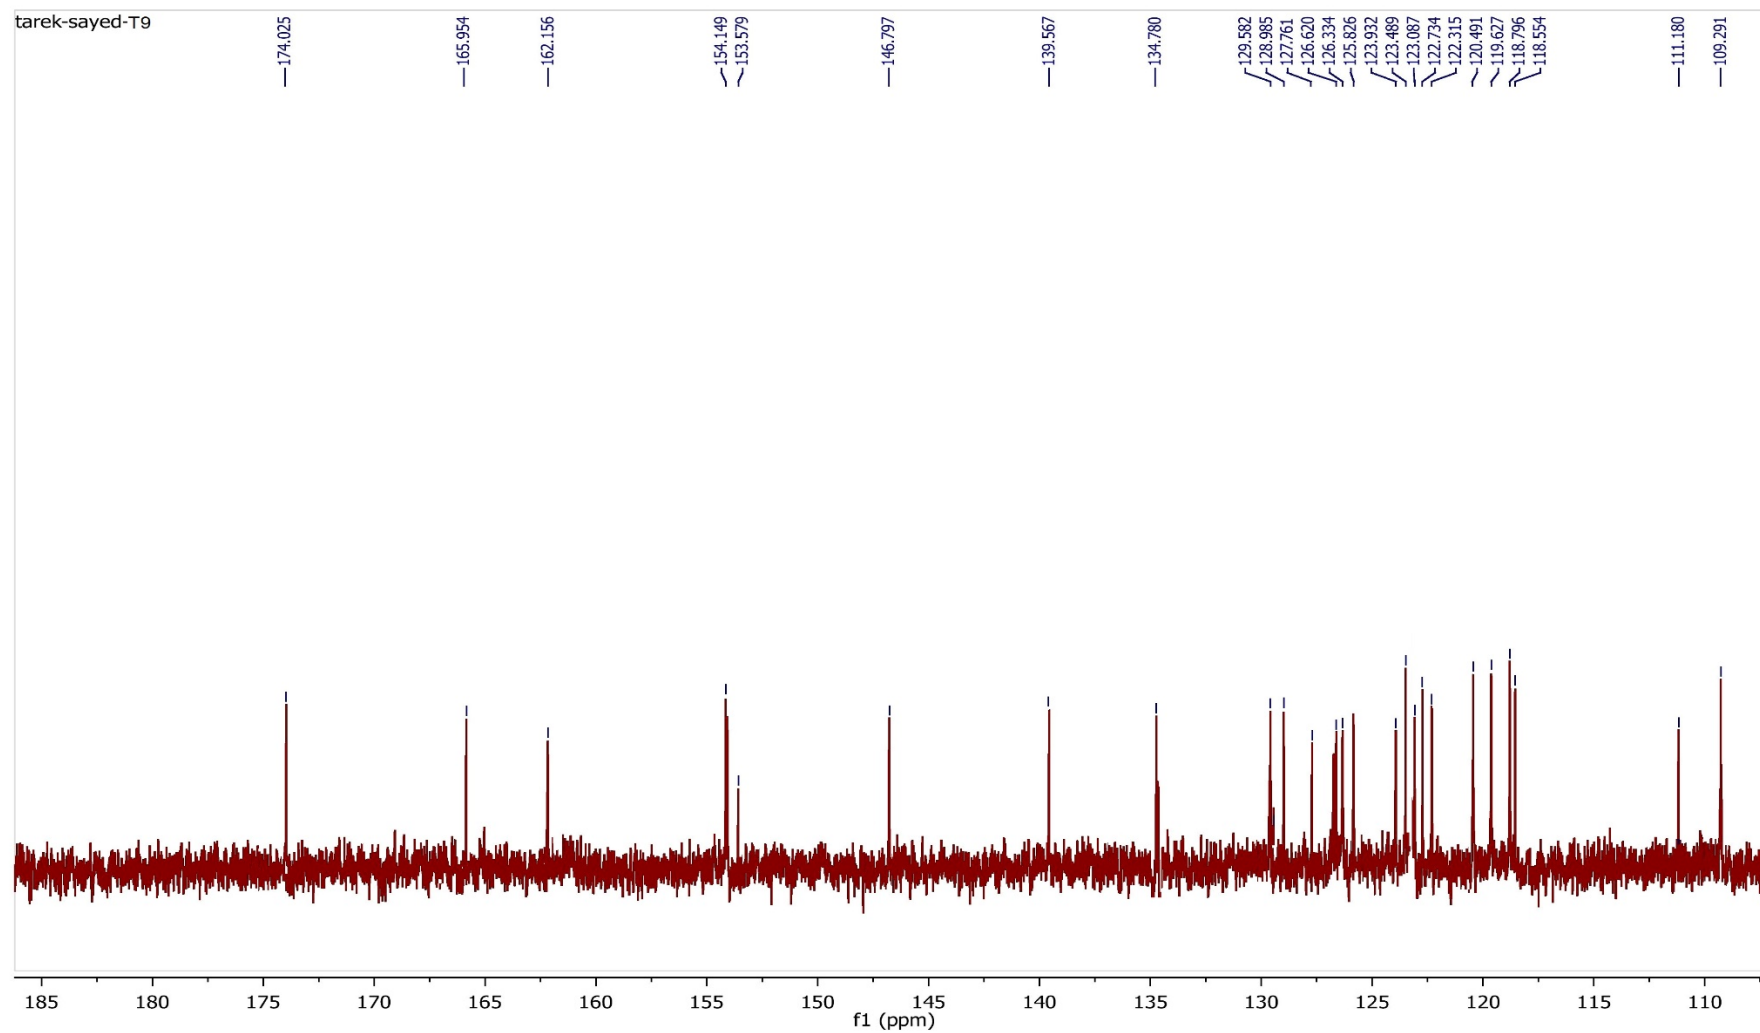

**Figure S6:** The enlargement of downfield region in  $^{13}\text{C}$ -NMR spectrum of compound **4a**.

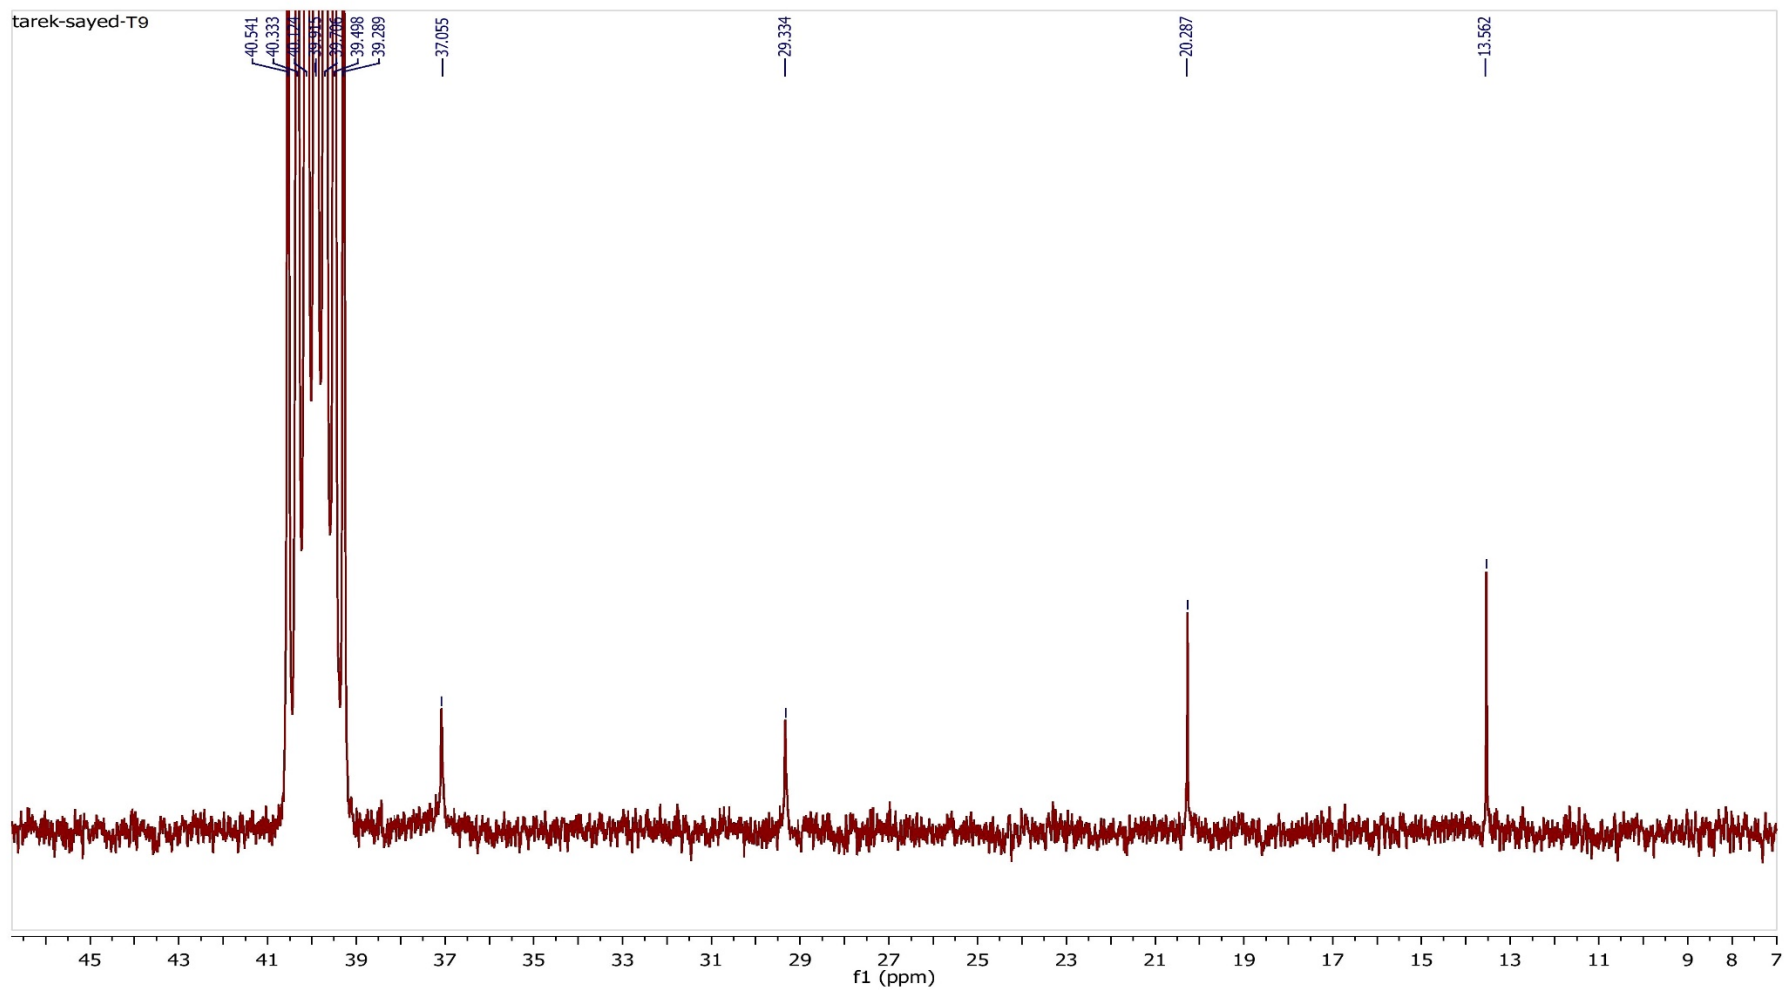

**Figure S7:** The enlargement of upfield region in  $^{13}\text{C}$ -NMR spectrum of compound **4a**.

tarek-T9 #48-50 RT: 0.82-0.85 AV: 3 SB: 2 3.82, 3.53 NL: 1.58E2  
T: (0,0) + c EI Full ms [40.00-1000.00]

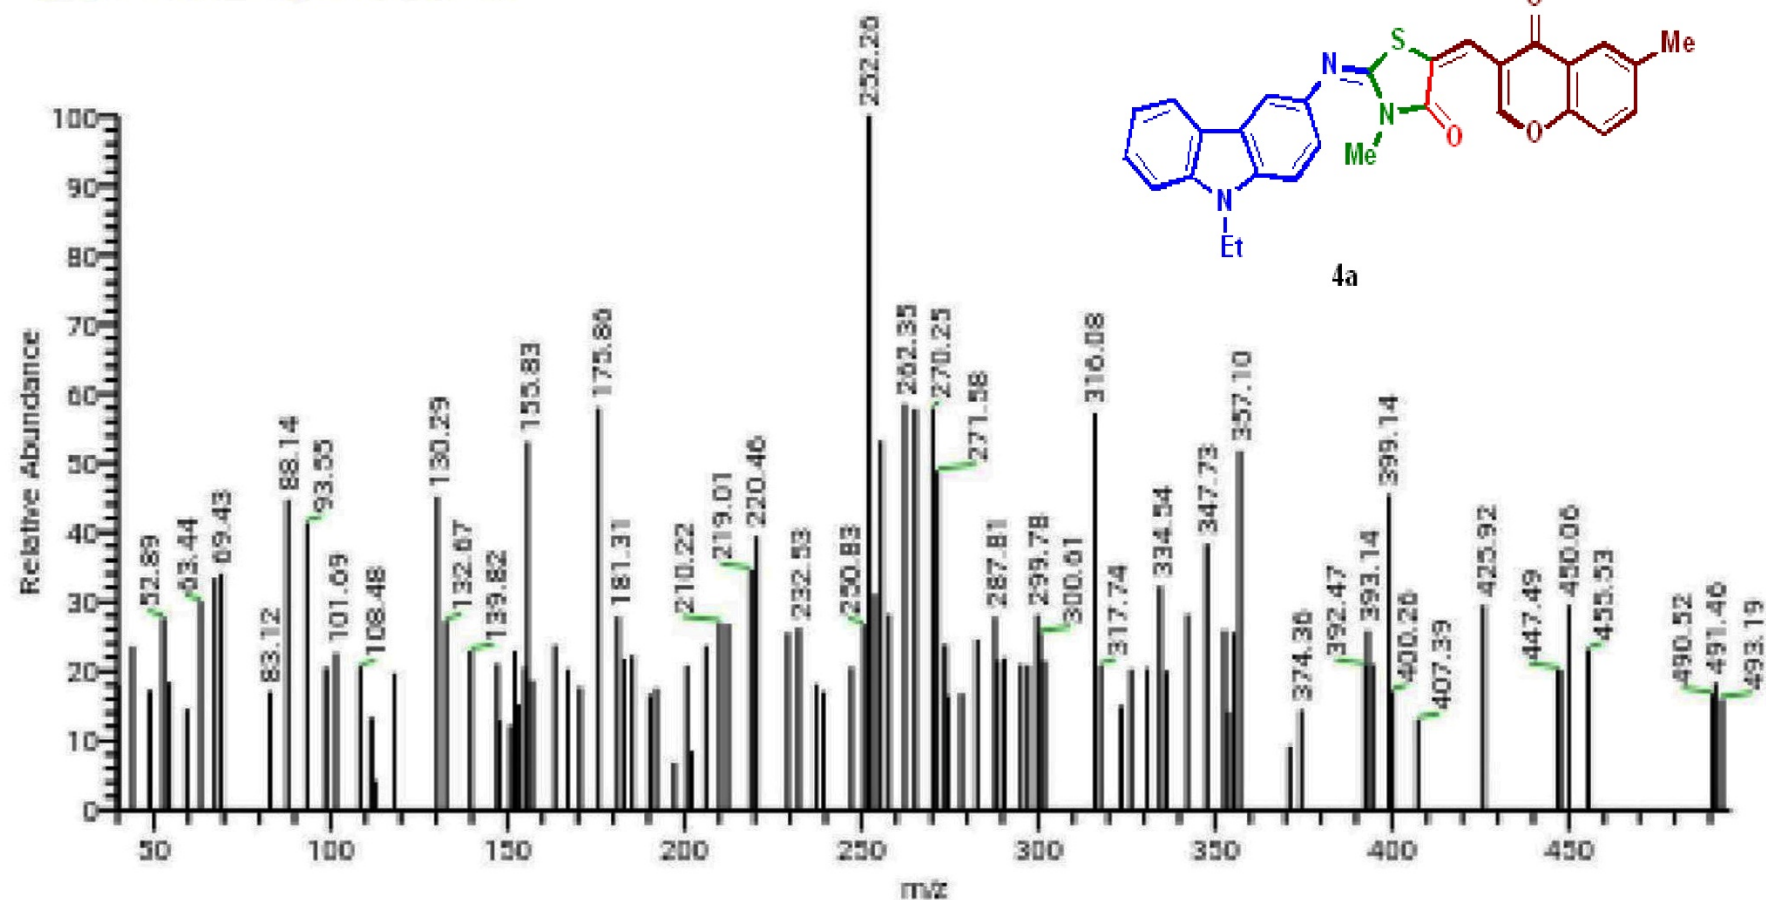

Figure S8: The mass spectrum of compound **4a**.

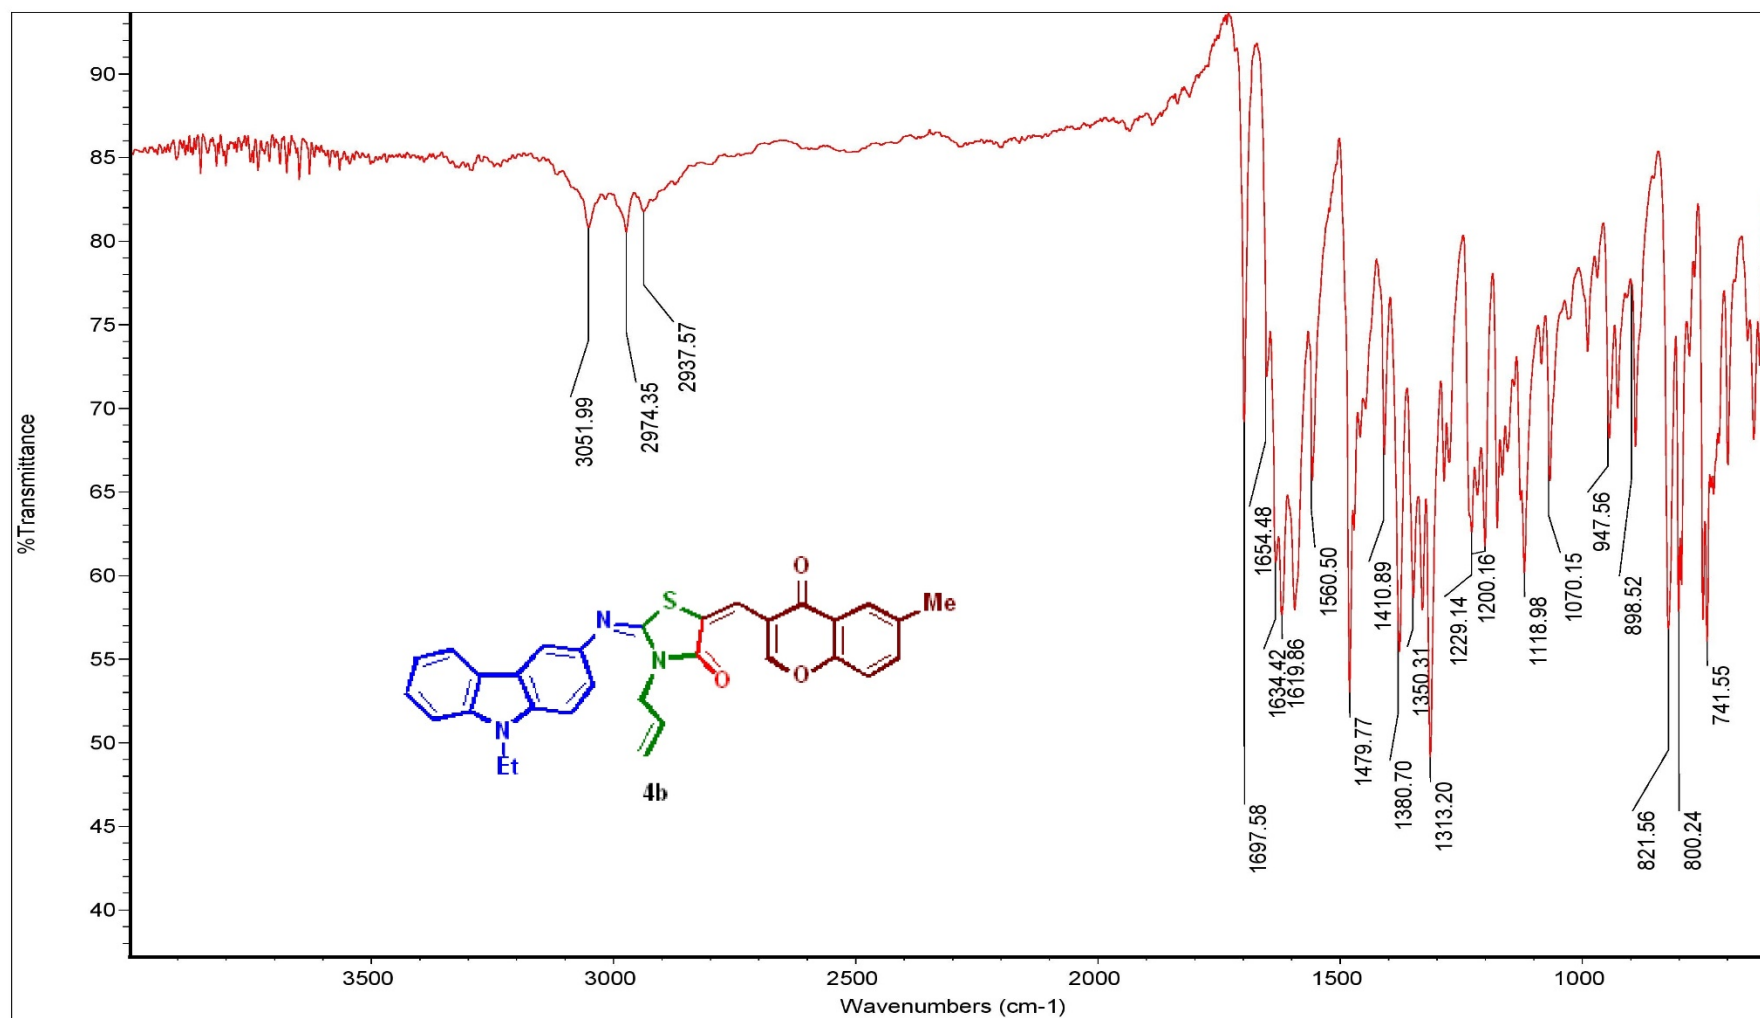

**Figure S9:** The IR spectrum of compound **4b**.

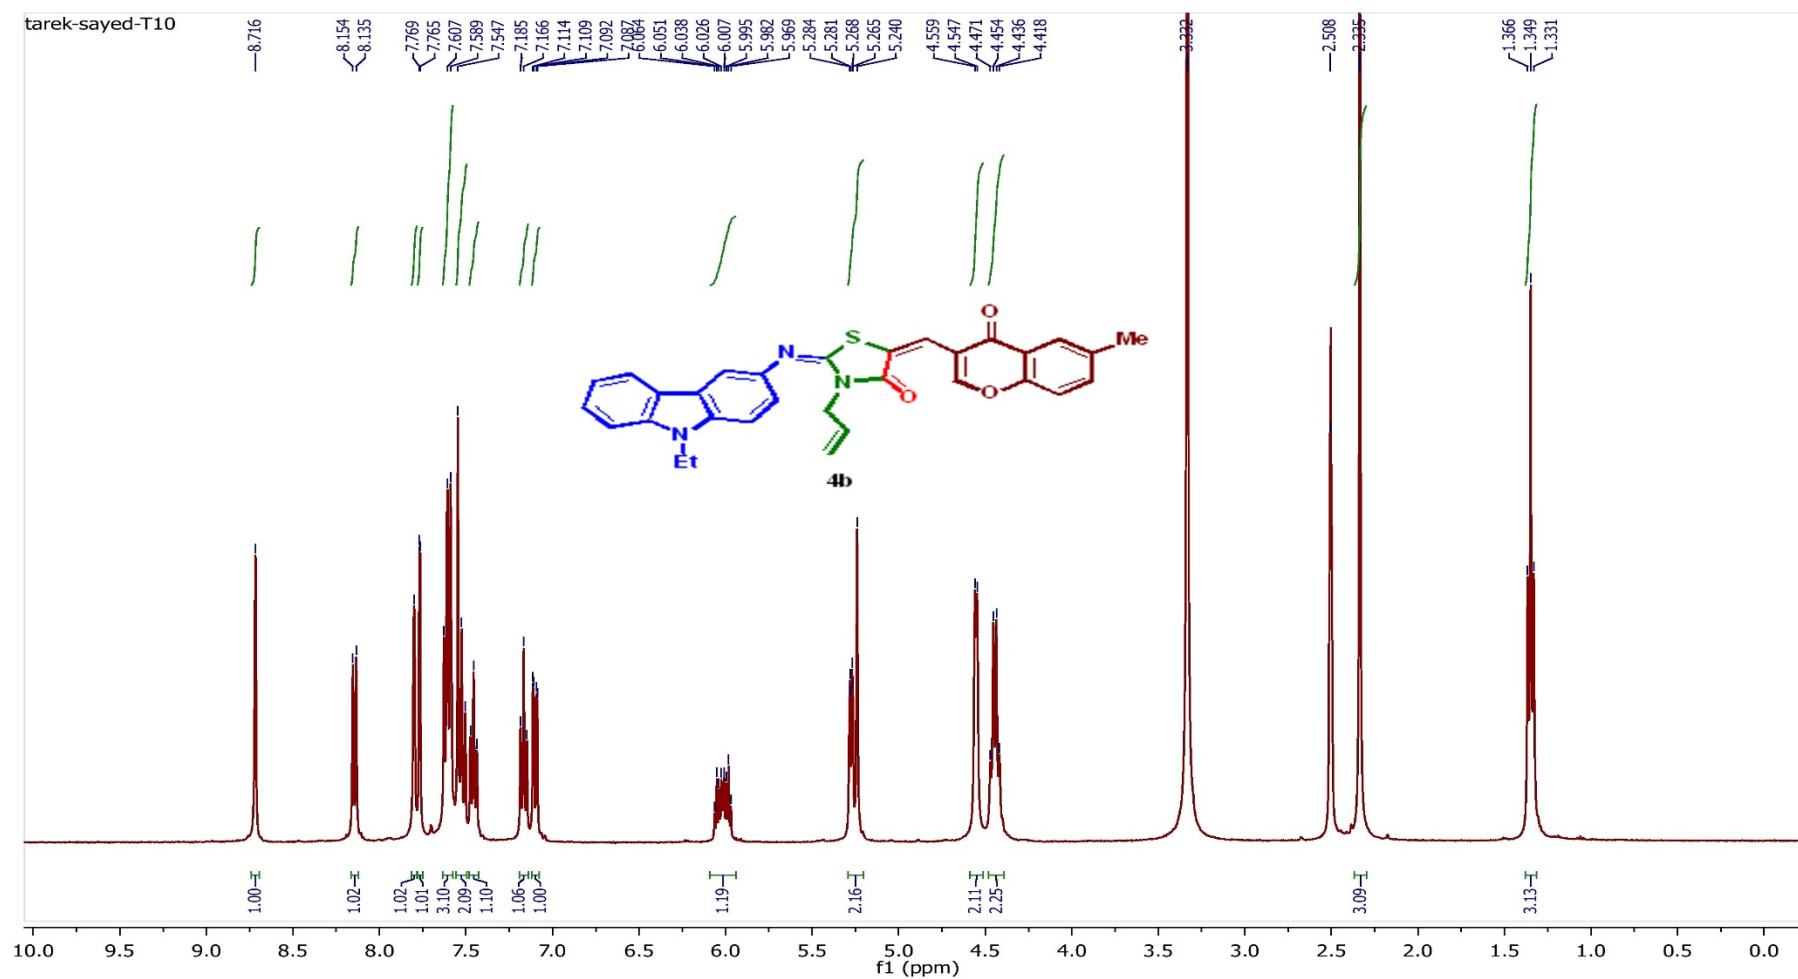

**Figure S10:** The  $^1\text{H}$ -NMR spectrum of compound **4b**.

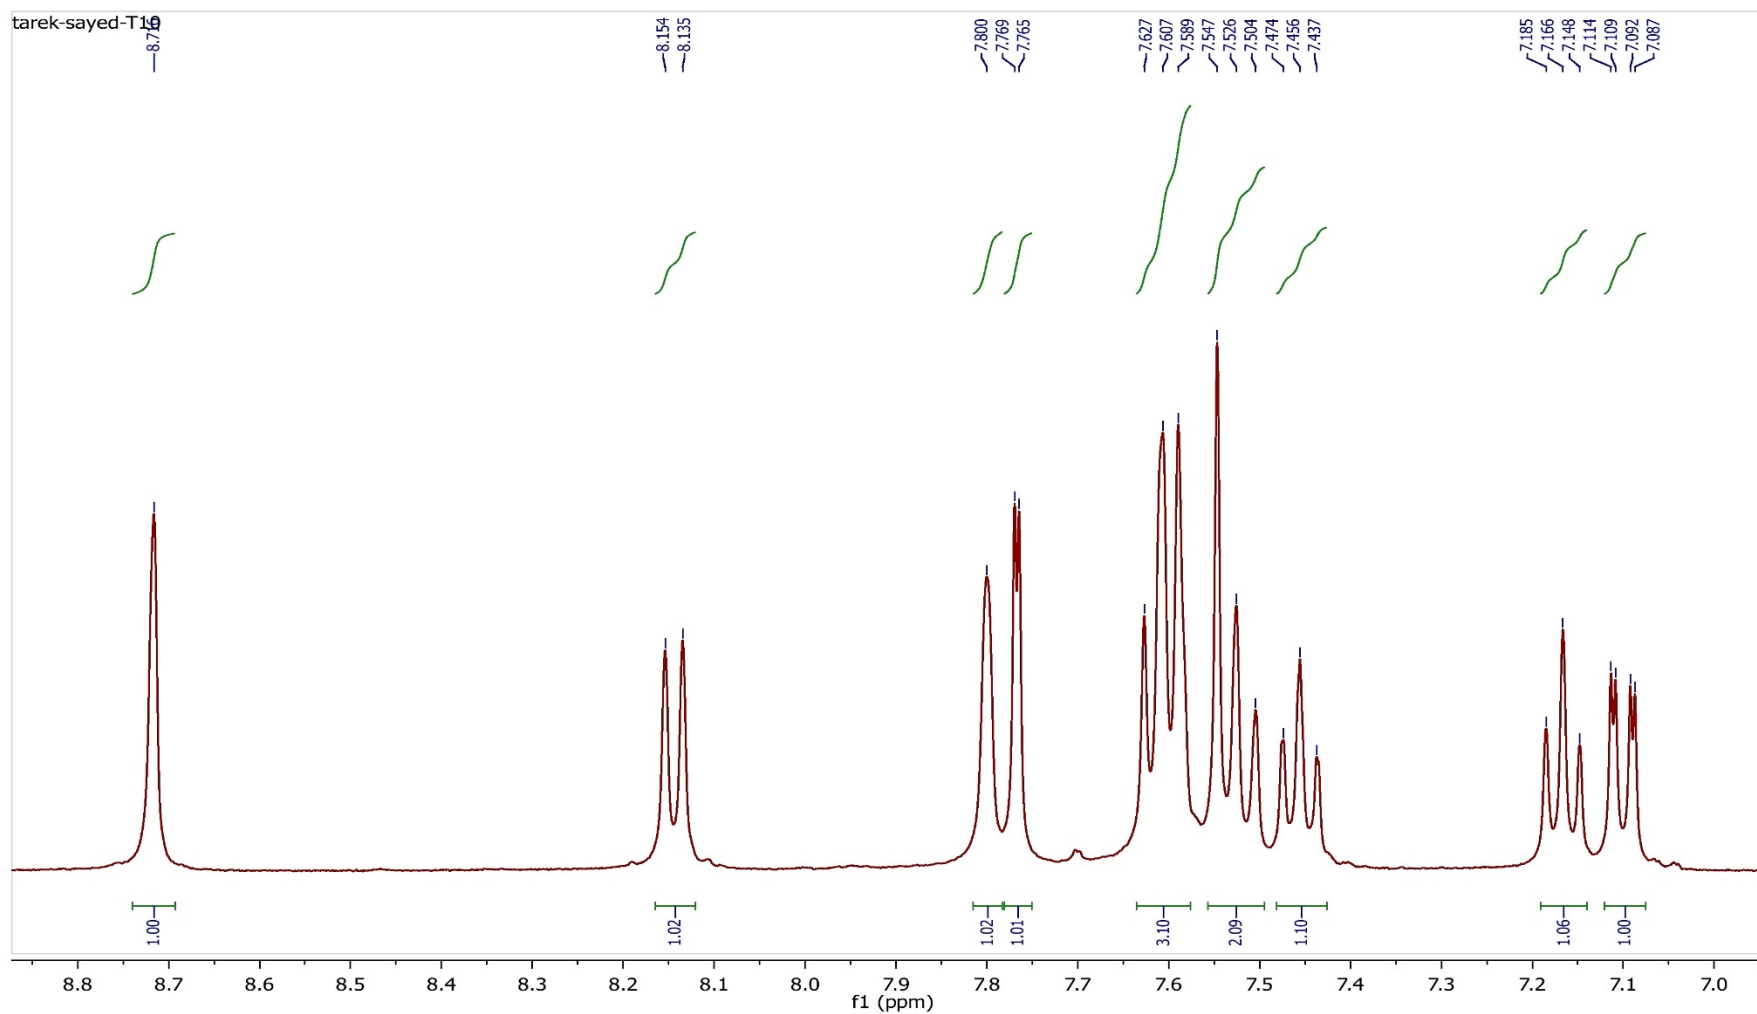

**Figure S11:** The enlargement of downfield region in  $^1\text{H}$ -NMR spectrum of compound **4b**.



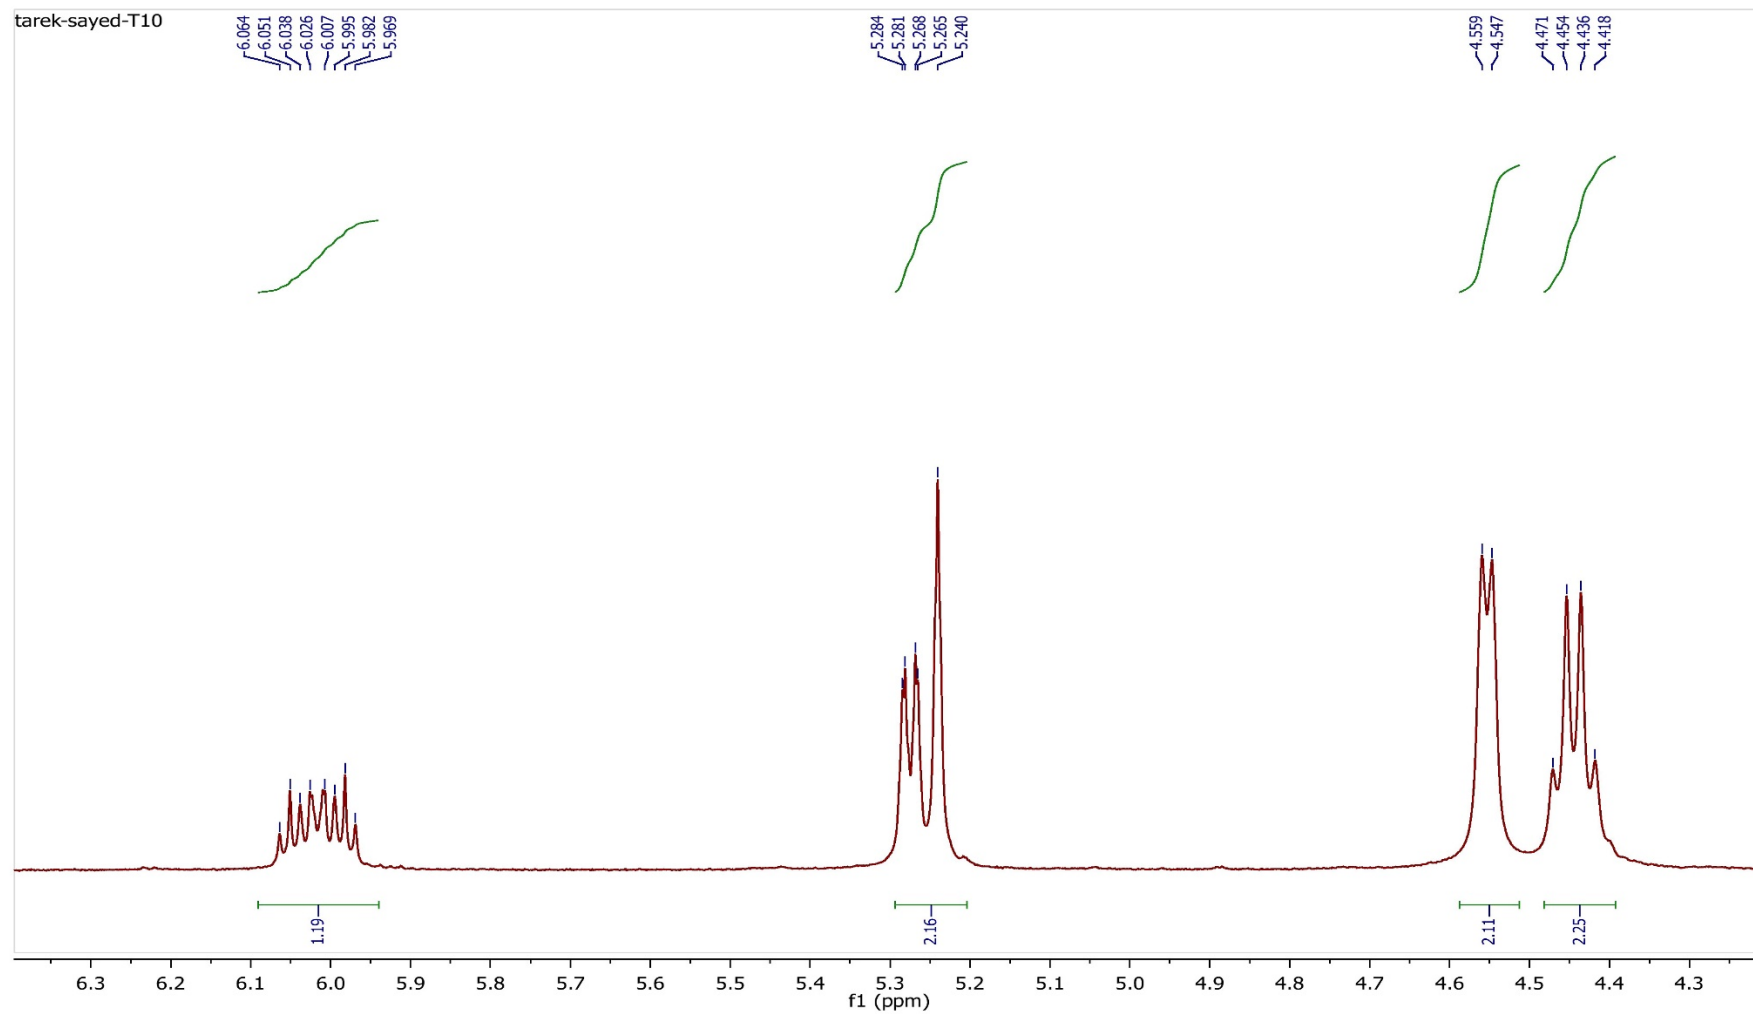

**Figure S12:** The enlargement of upfield region in  $^1\text{H}$ -NMR spectrum of compound **4b**.

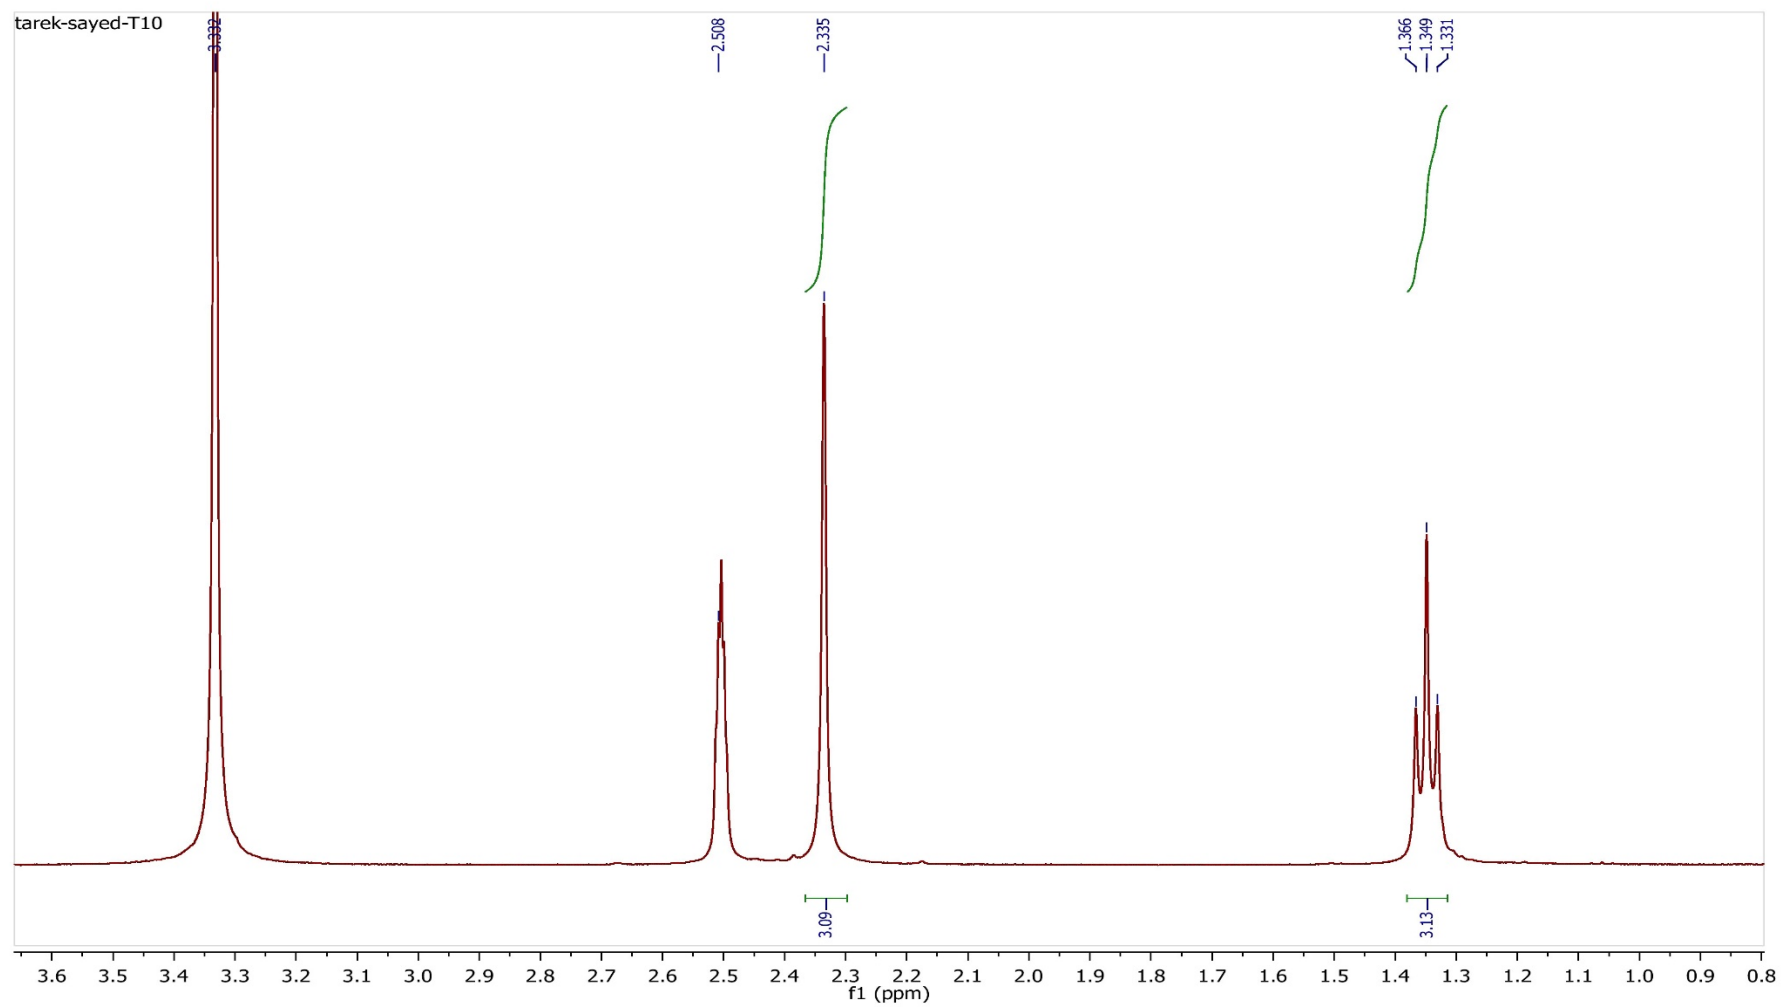

**Figure S13:** The enlargement of upfield region in  $^1\text{H}$ -NMR spectrum of compound **4b**.

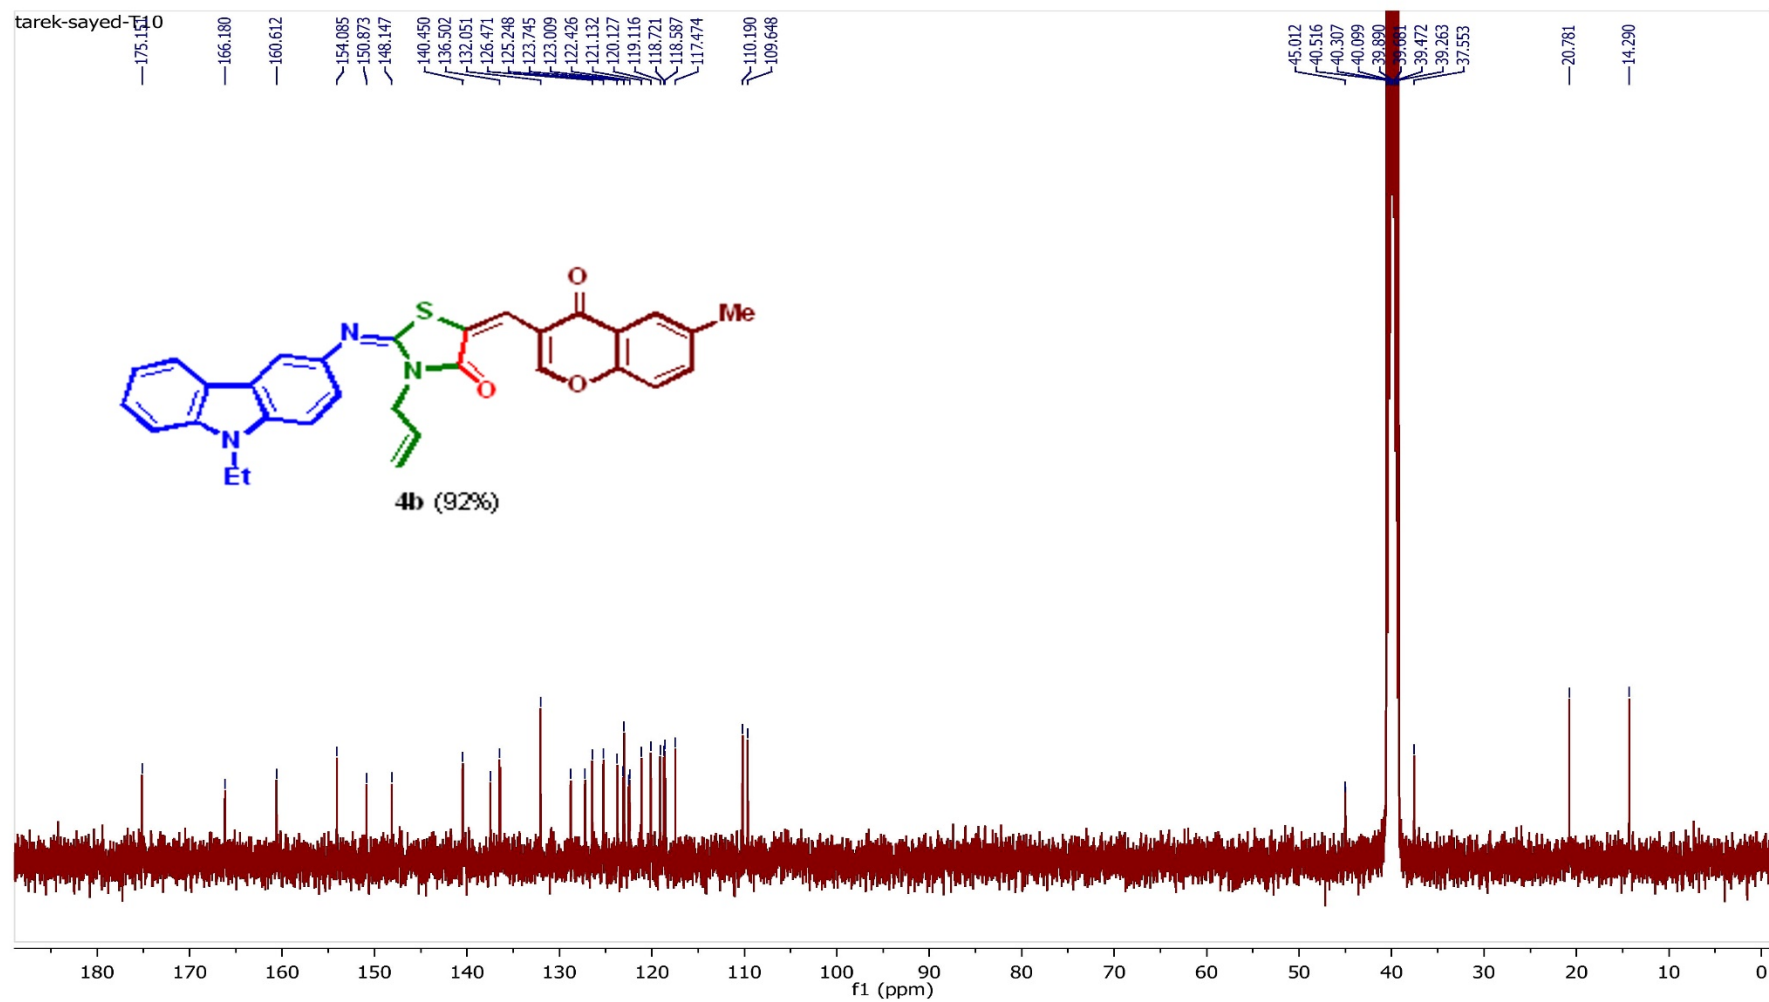

**Figure S14:** The <sup>13</sup>C-NMR spectrum of compound **4b**.

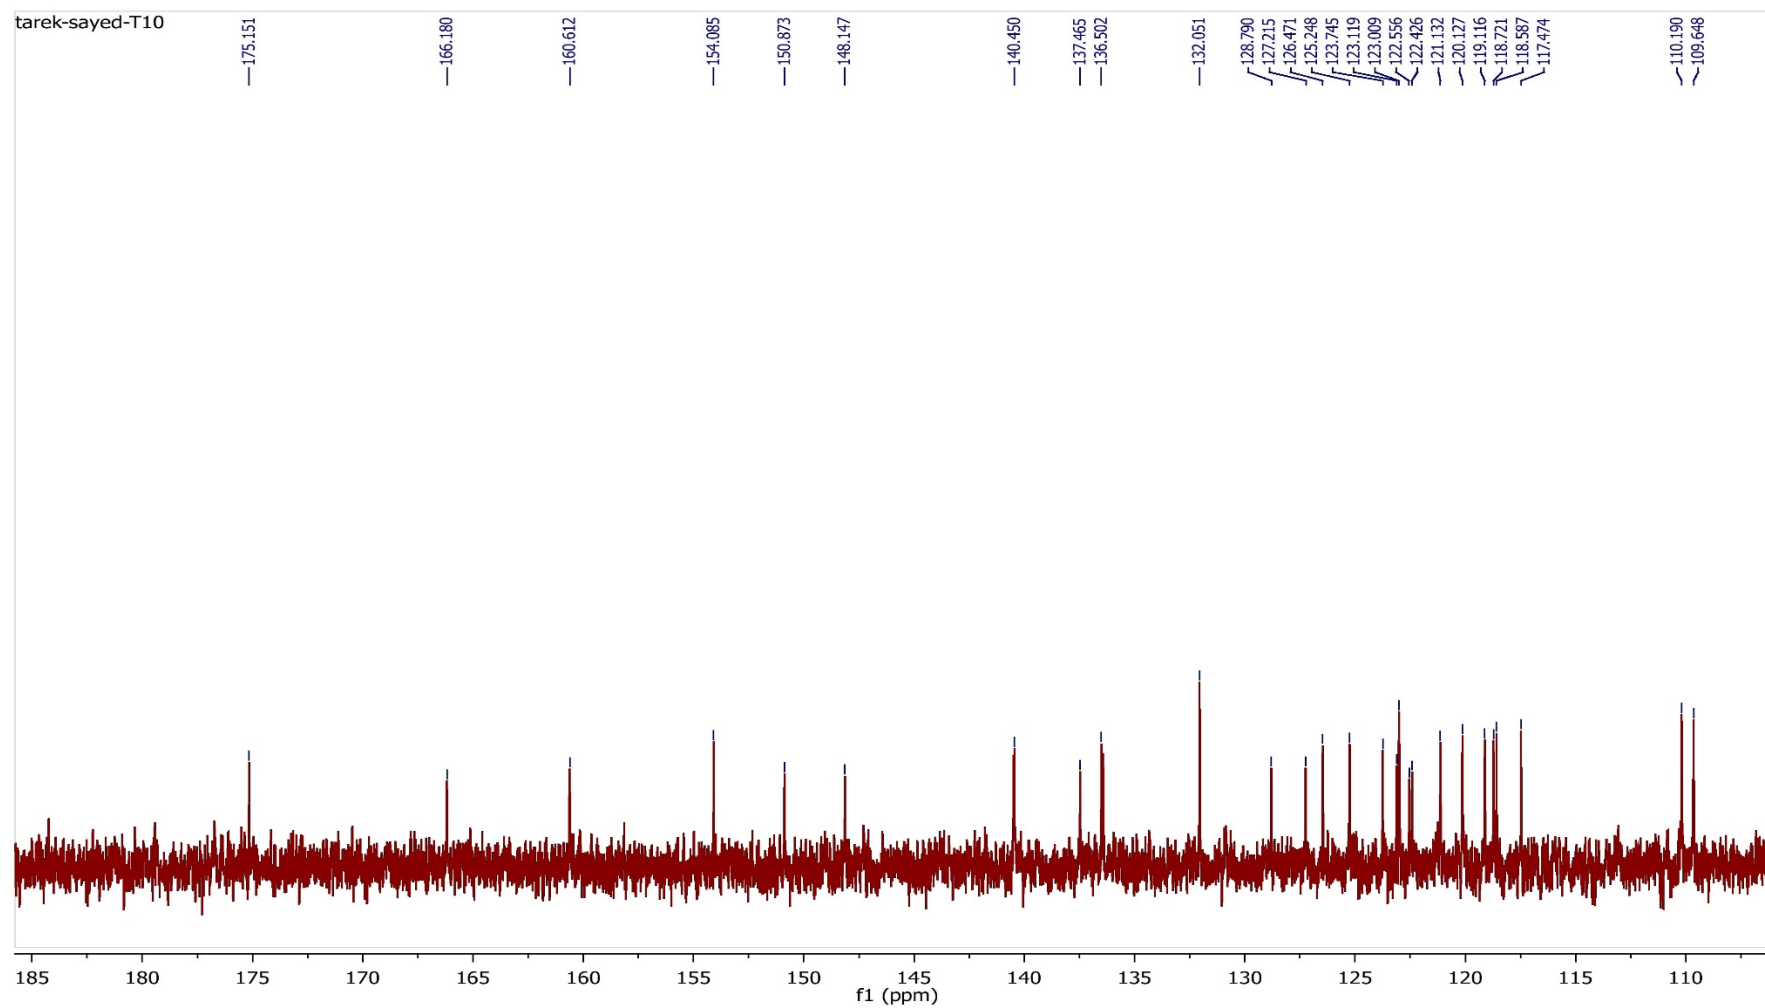

**Figure S15:** The enlargement of downfield region in  $^{13}\text{C}$ -NMR spectrum of compound **4b**.

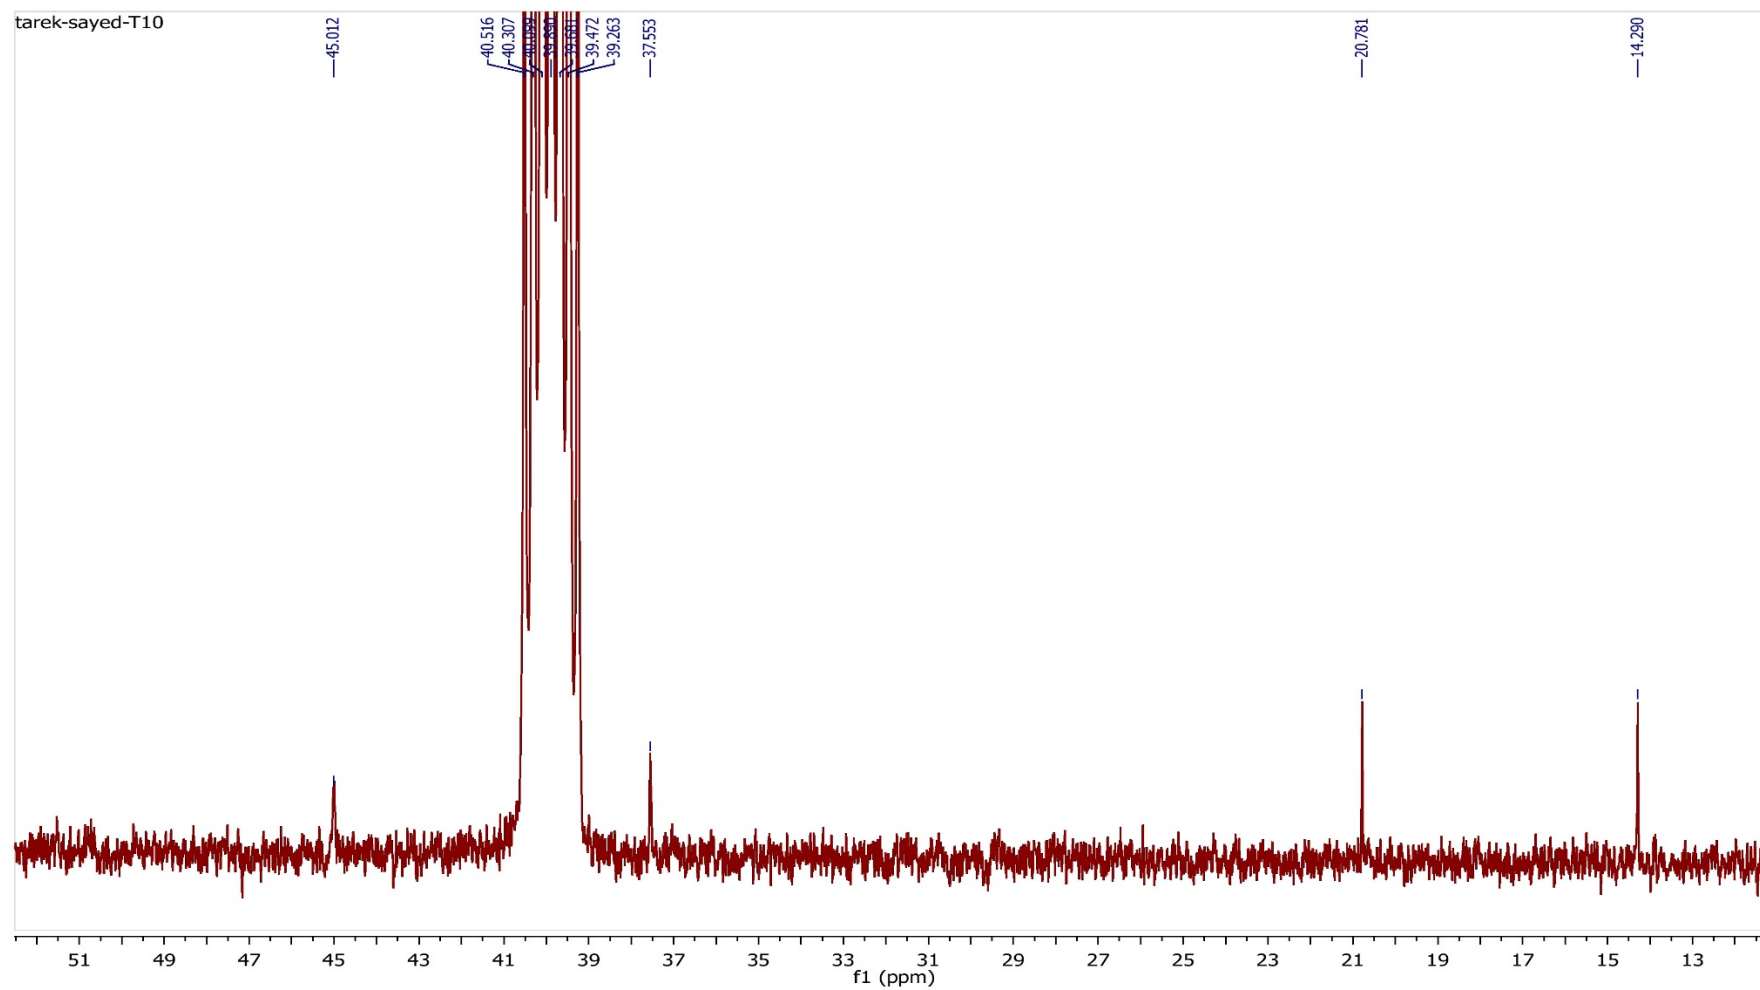

**Figure S16:** The enlargement of upfield region in  $^{13}\text{C}$ -NMR spectrum of compound **4b**.

tarek-T10 #232-237 RT: 3.90-3.98 AV: 6 SB: 2 3.82, 3.53 NL: 1.51E2  
T: (0,0) + e EI Full ms [40.00-1000.00]

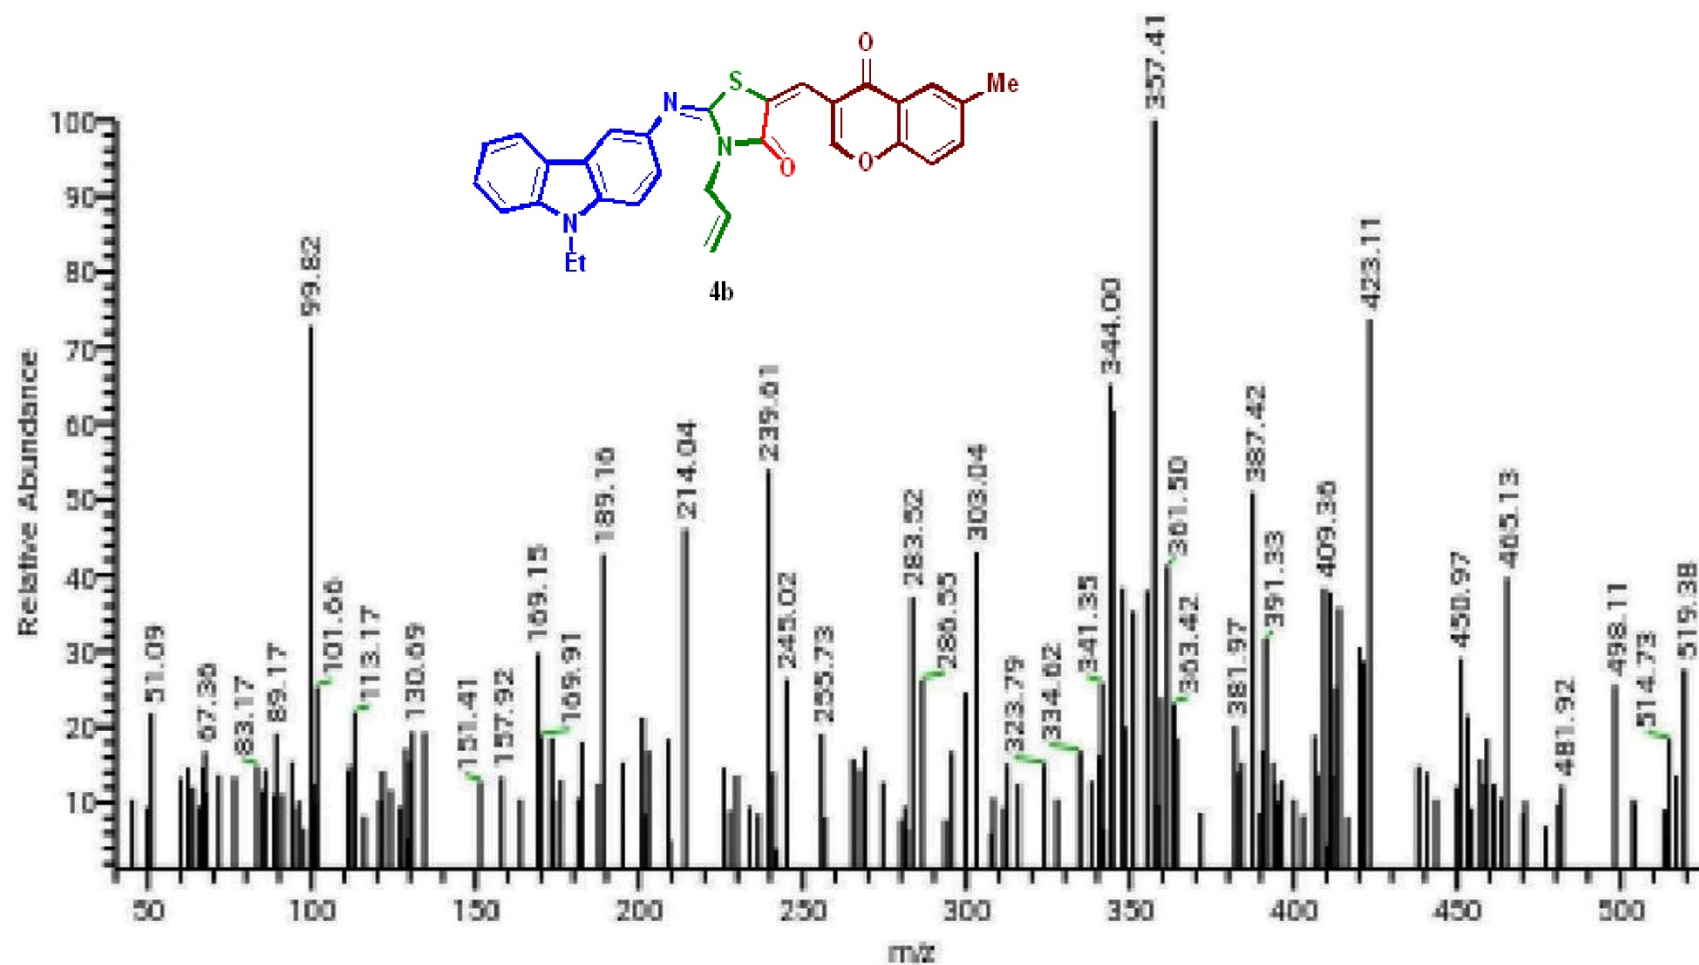

Figure S17: The mass spectrum of compound 4b.

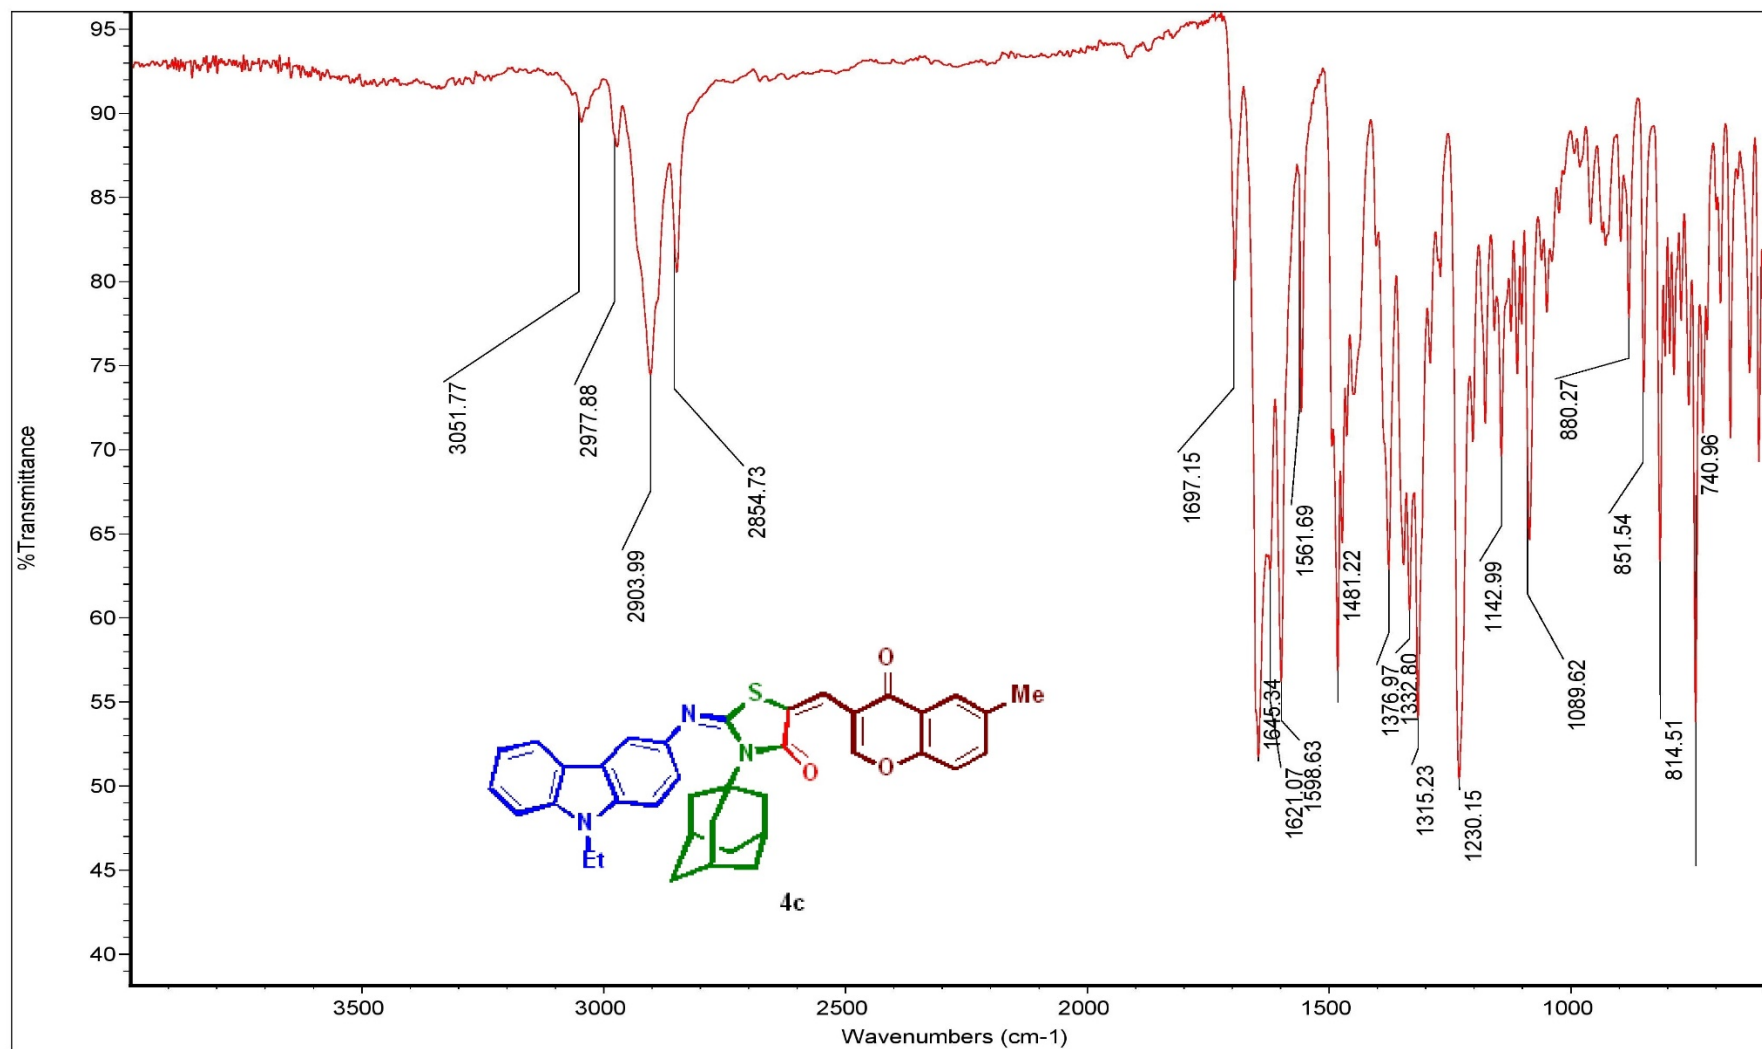

**Figure S18:** The IR spectrum of compound **4c**.

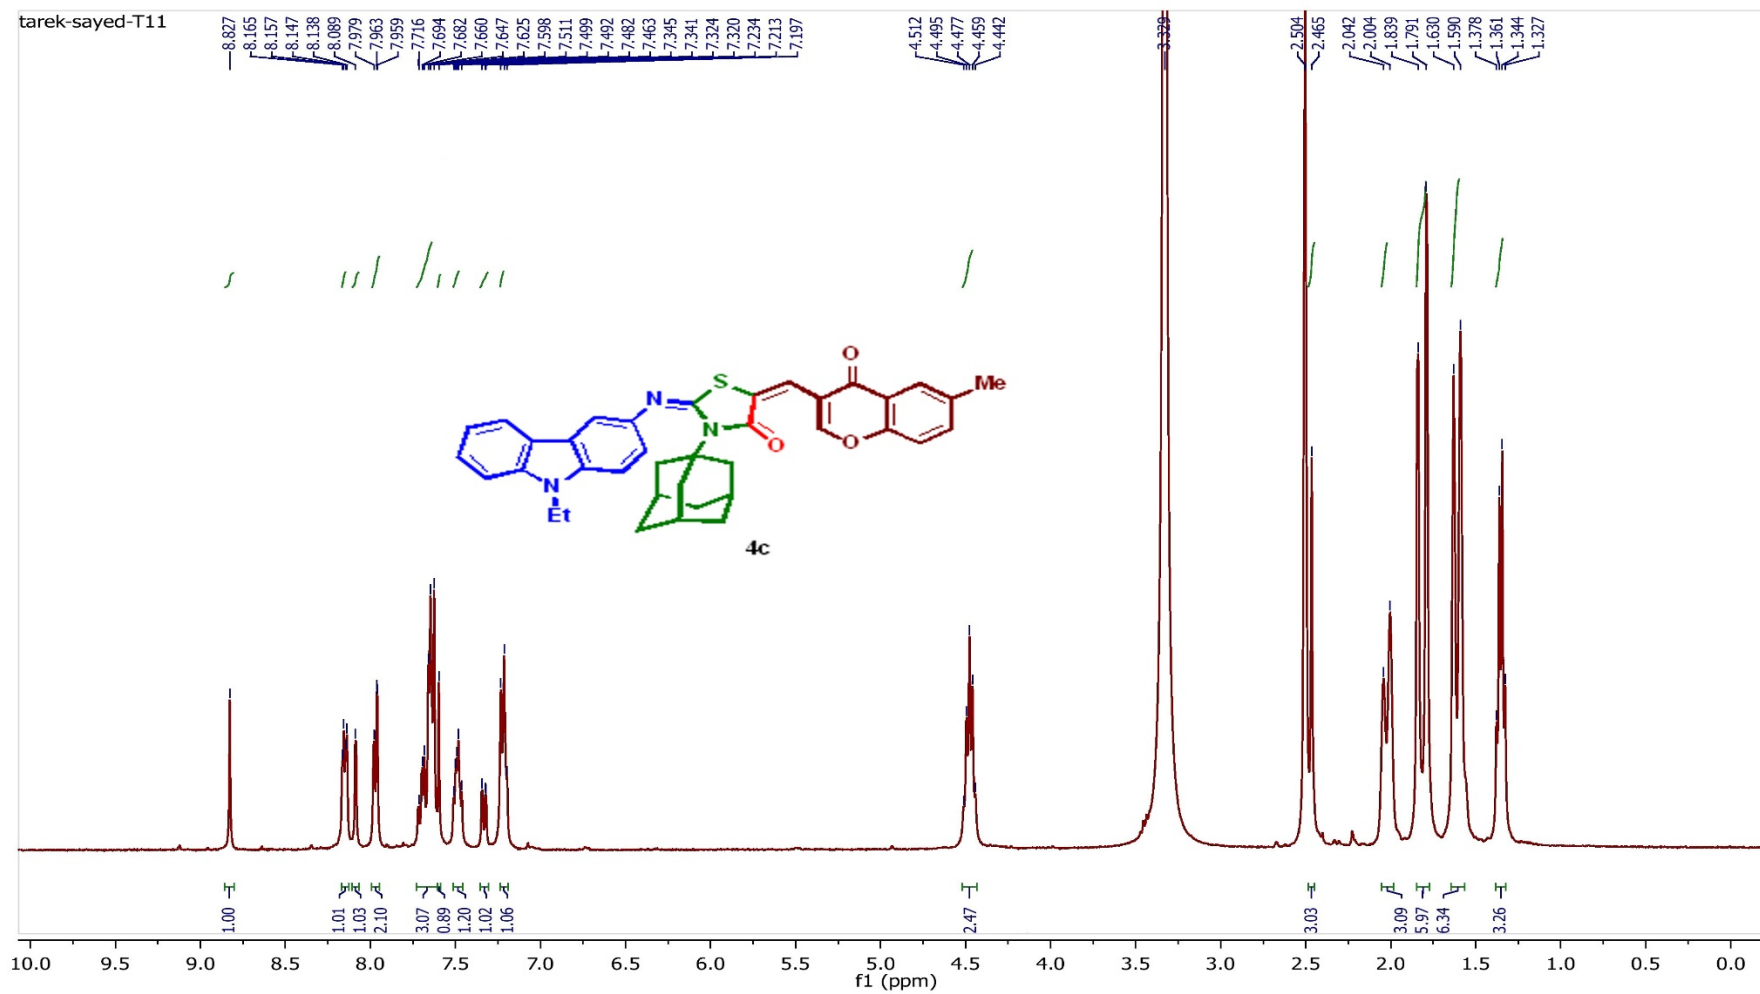

**Figure S19:** The  $^1\text{H}$ -NMR spectrum of compound **4c**.



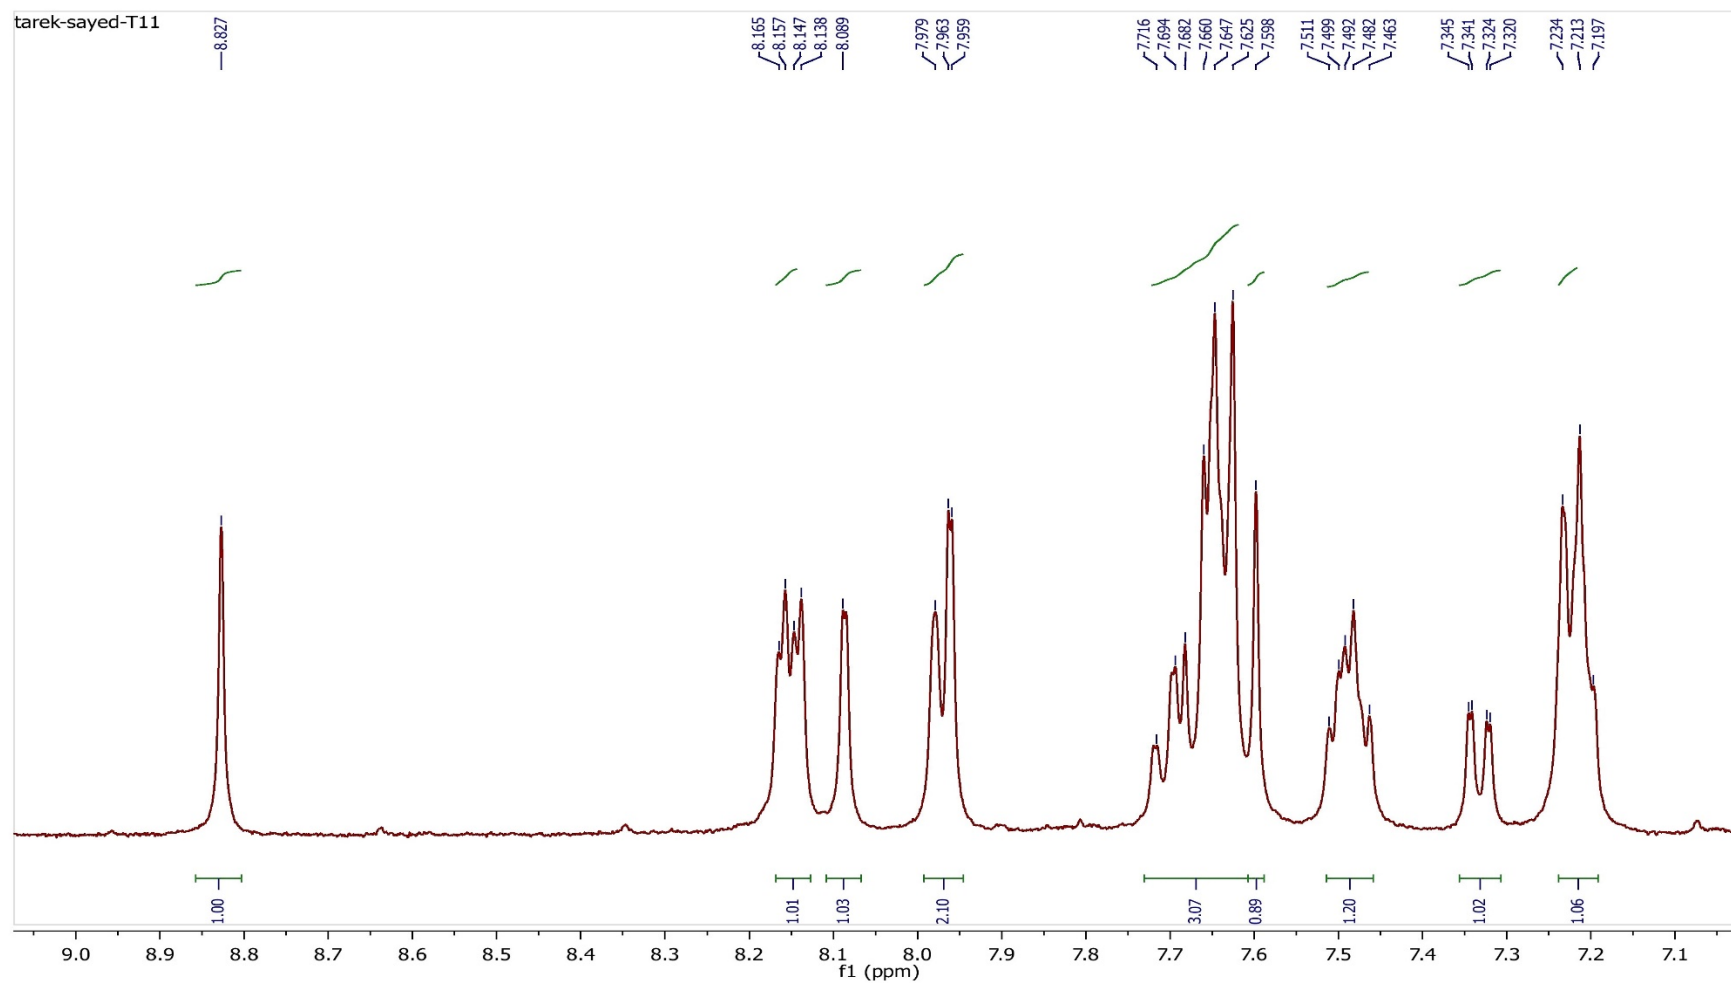

**Figure S20:** The enlargement of downfield region in  $^1\text{H}$ -NMR spectrum of compound **4c**.

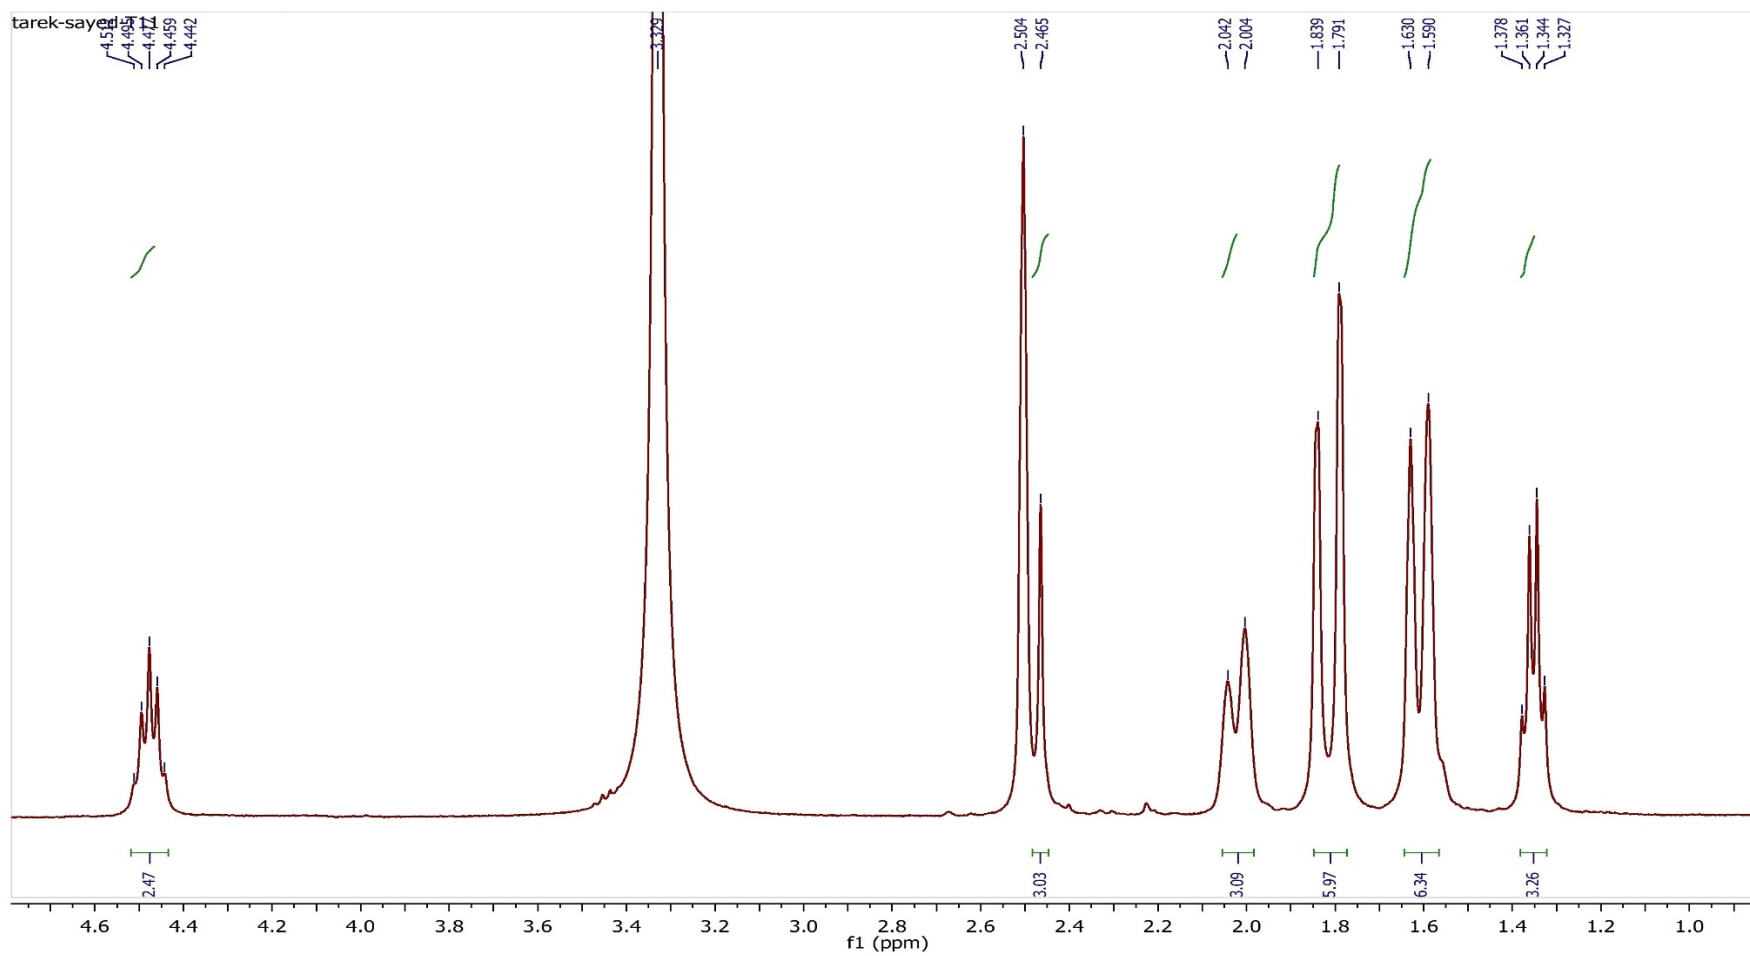

**Figure S21:** The enlargement of upfield region in  $^1\text{H}$ -NMR spectrum of compound **4c**.

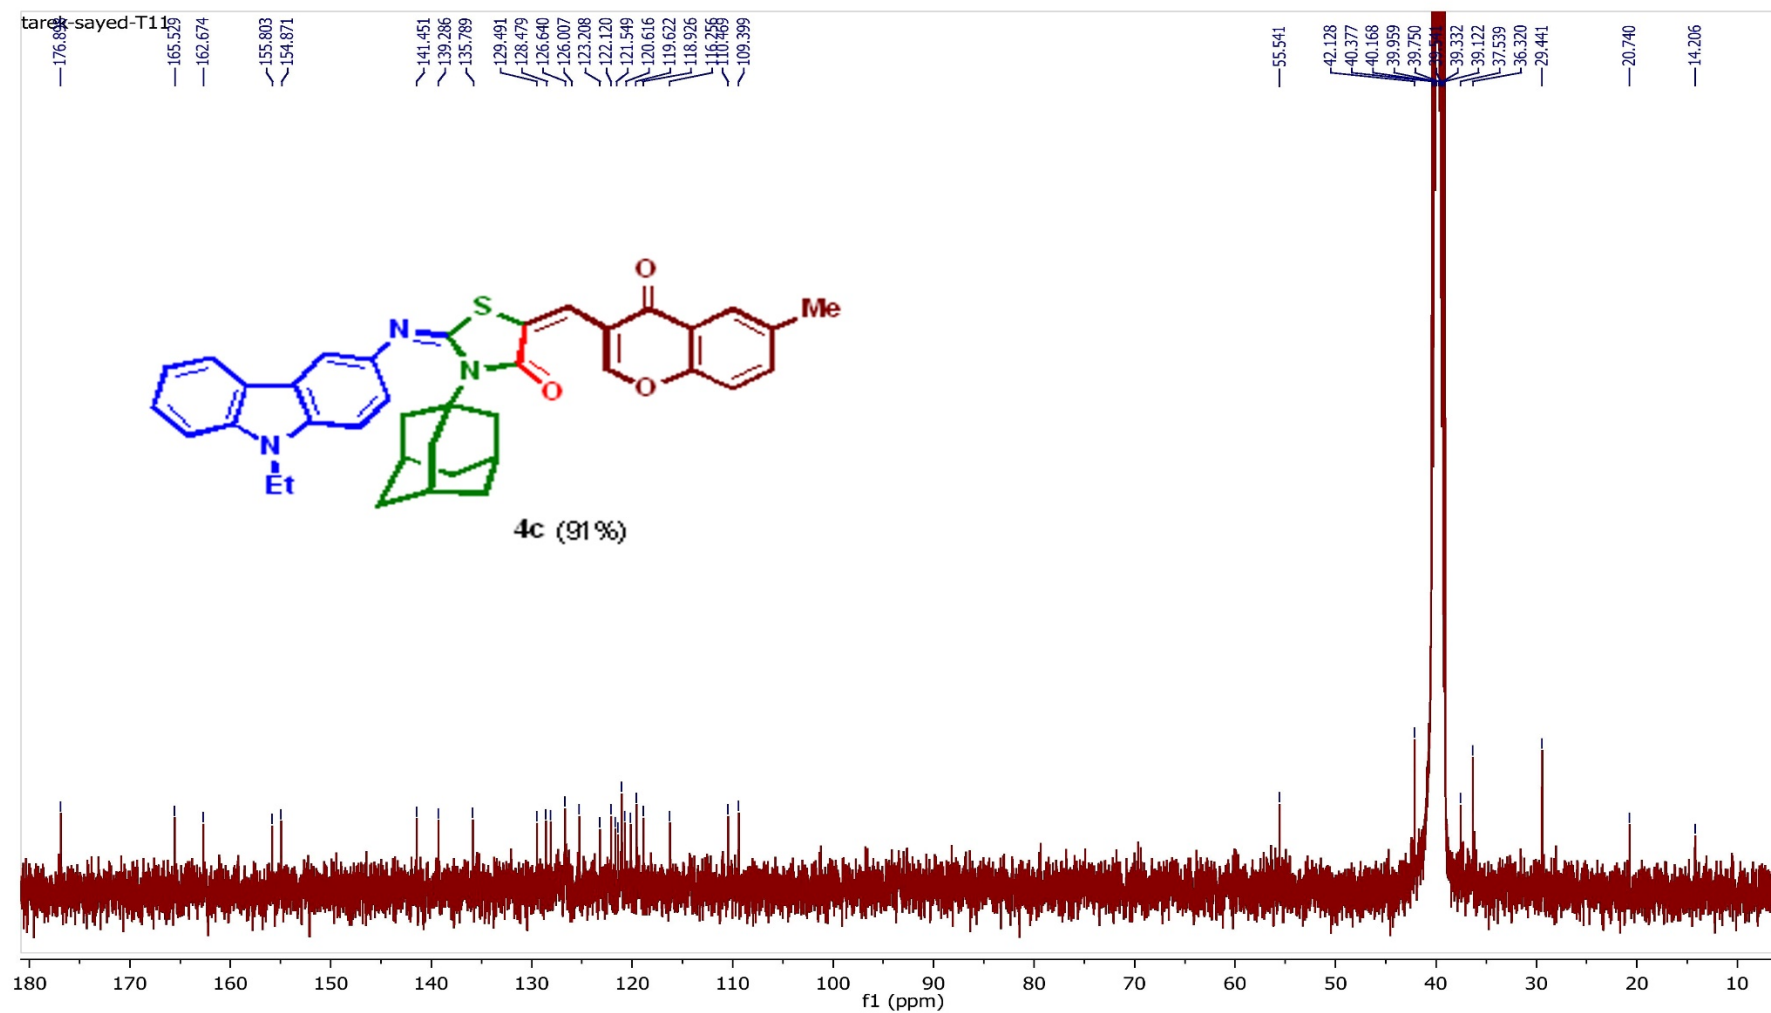

**Figure S22:** The  $^{13}\text{C}$ -NMR spectrum of compound **4c**.

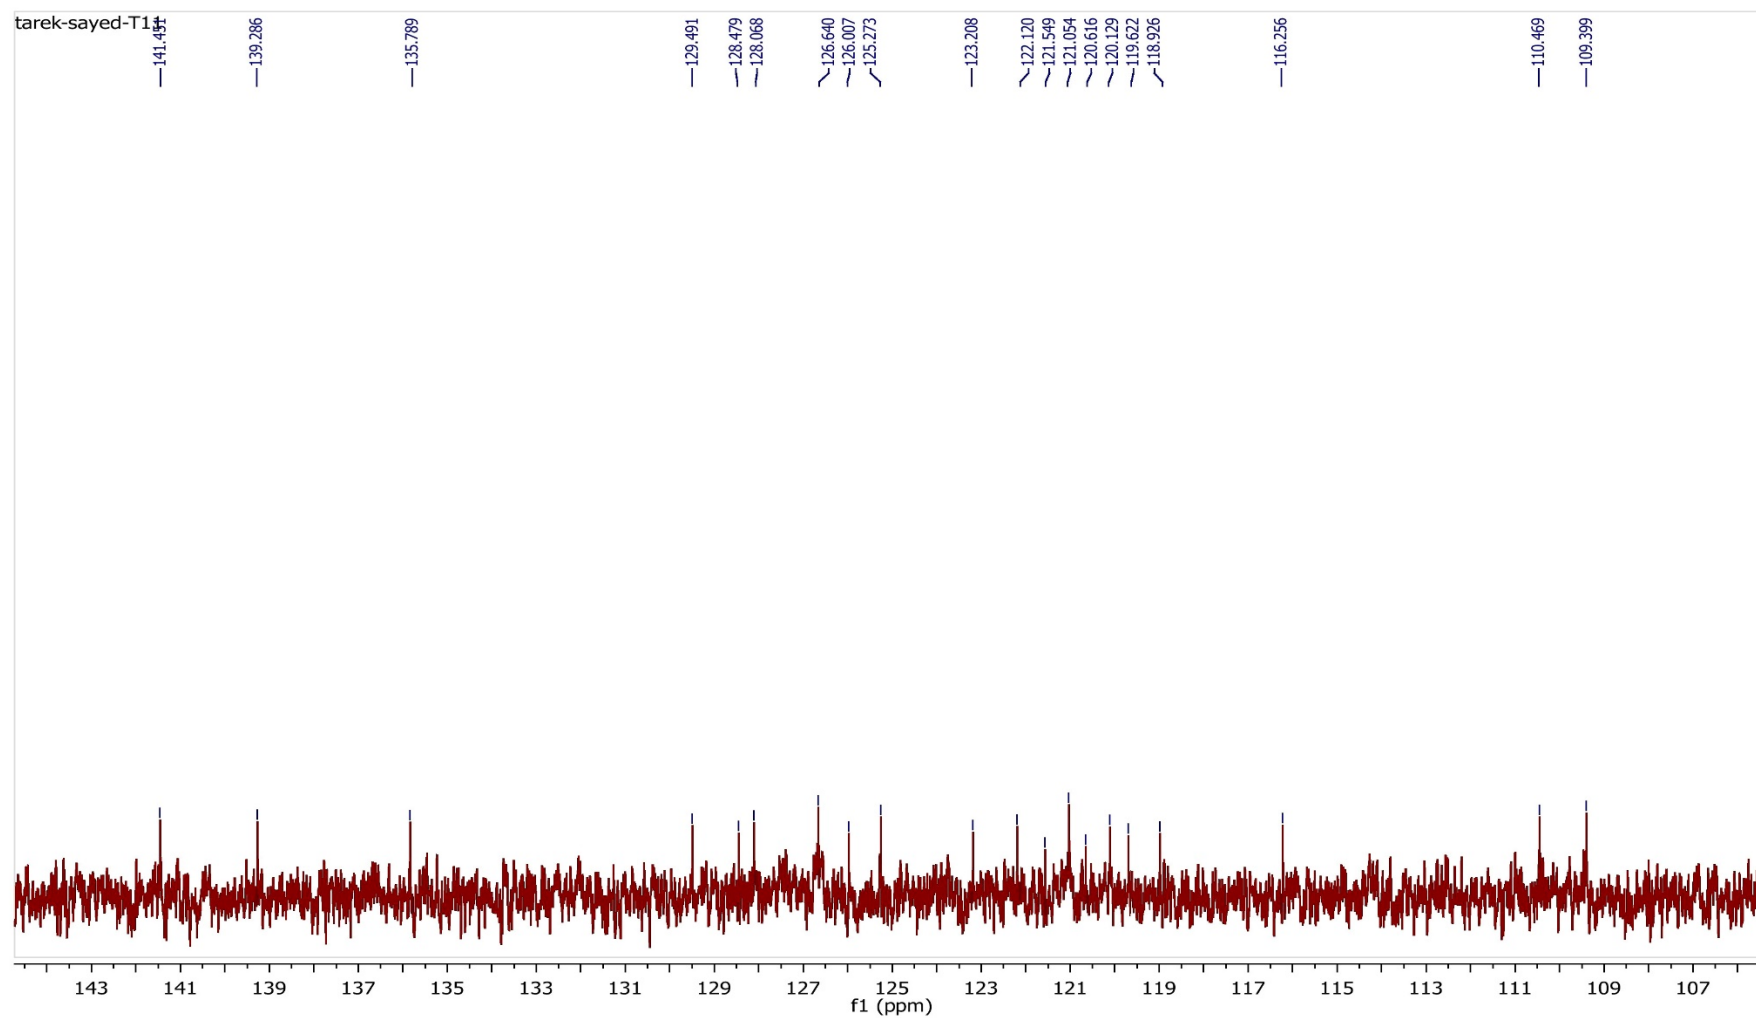

**Figure S23:** The enlargement of downfield region in  $^{13}\text{C}$ -NMR spectrum of compound **4c**.

tarek-T11 #86-90 RT: 1.46-1.52 AV: 5 SB: 2 3.82, 3.53 NL: 3.01E2  
T: (0,0) + e EI Full ms [40.00-1000.00]

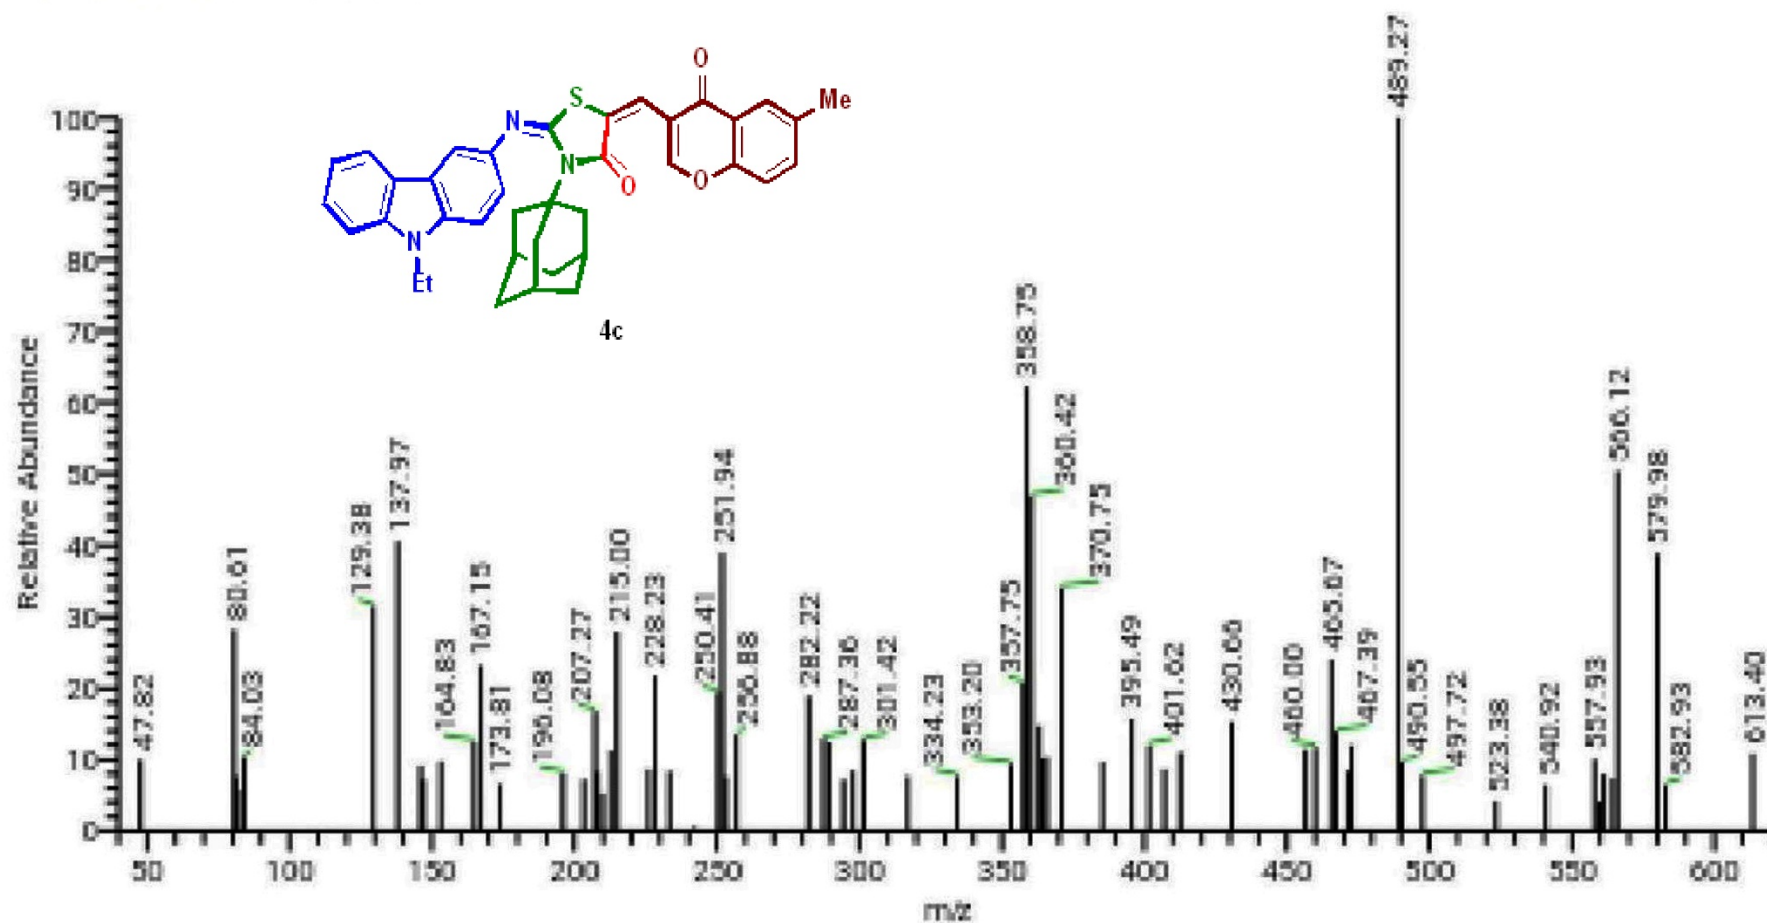

Figure S24: The mass spectrum of compound 4c.

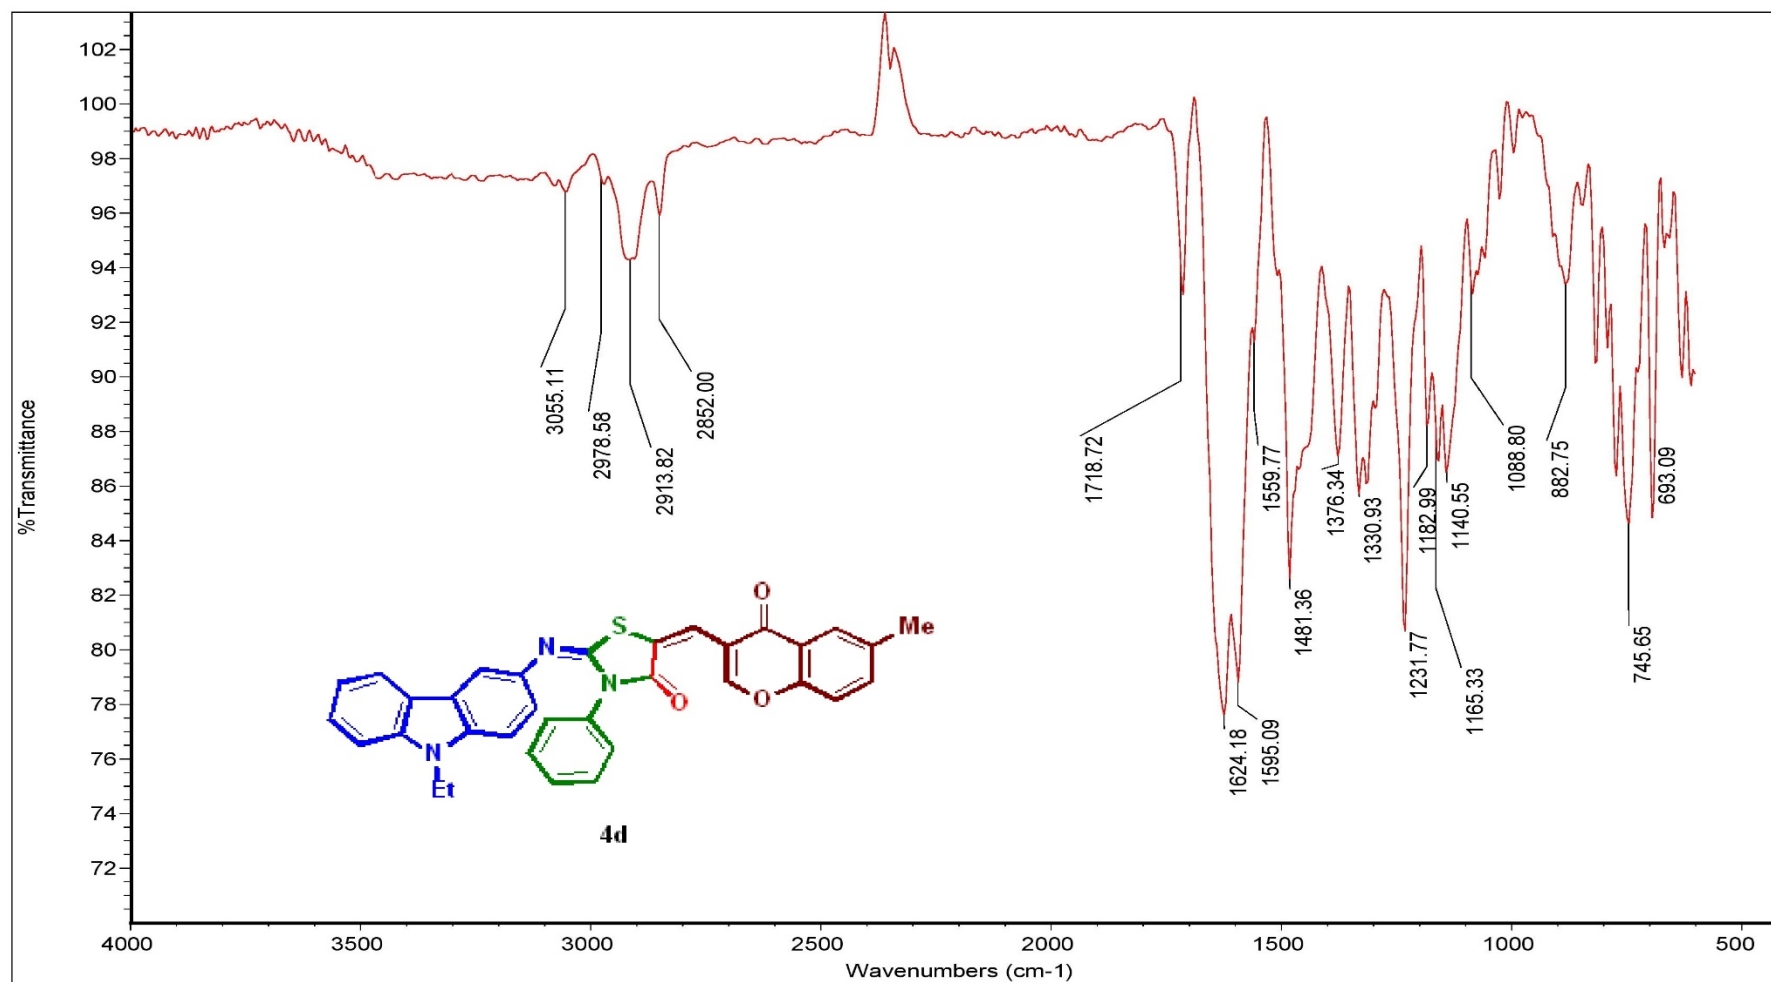

**Figure S25:** The IR spectrum of compound **4d**.

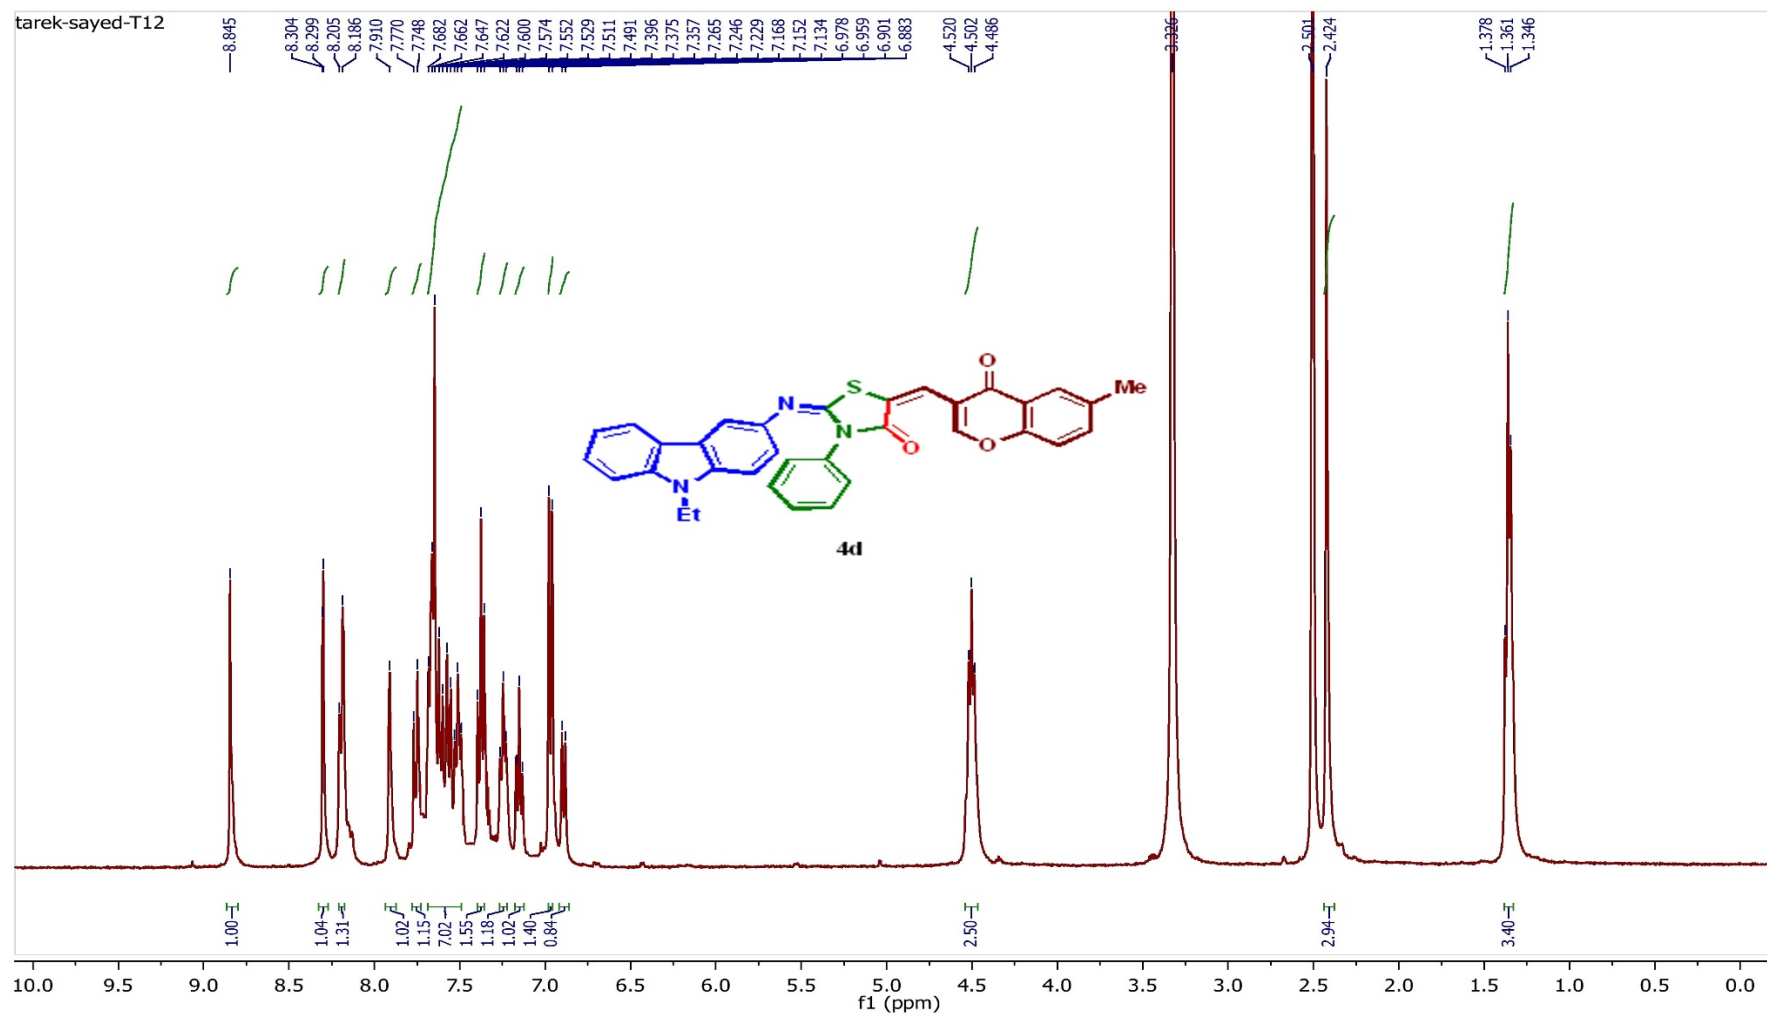

**Figure S26:** The  $^1\text{H}$ -NMR spectrum of compound **4d**.

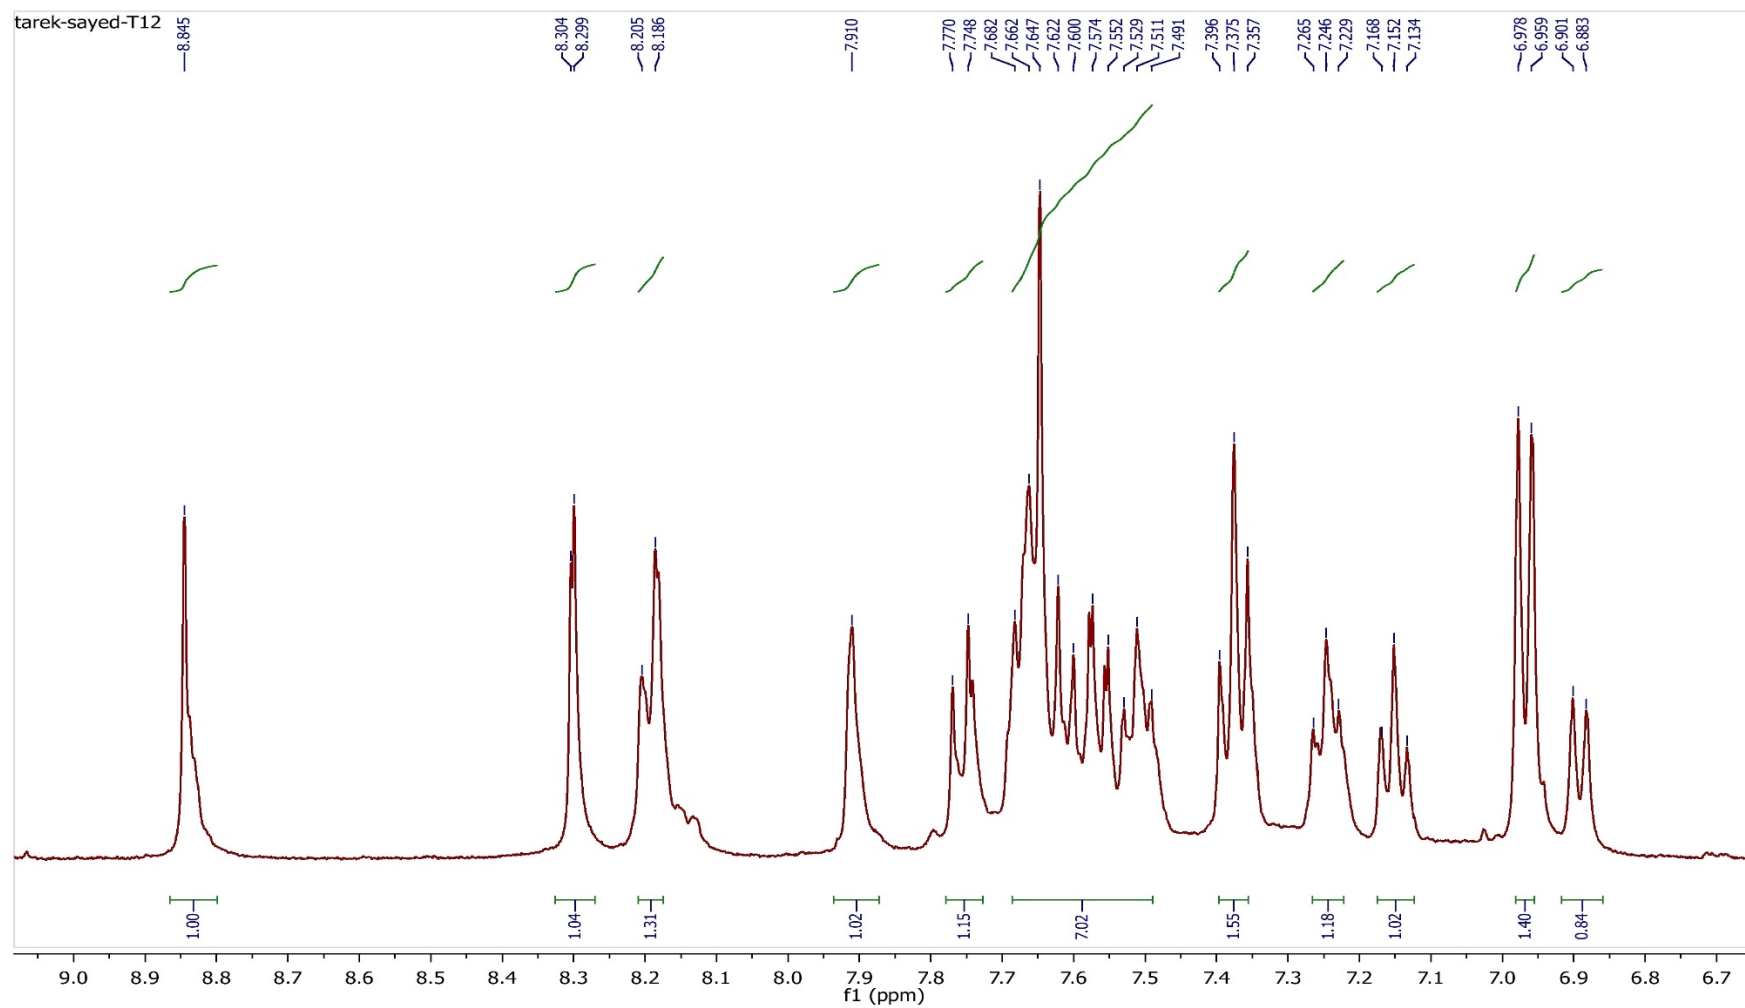

**Figure S27:** The enlargement of downfield region in  $^1\text{H}$ -NMR spectrum of compound **4d**.



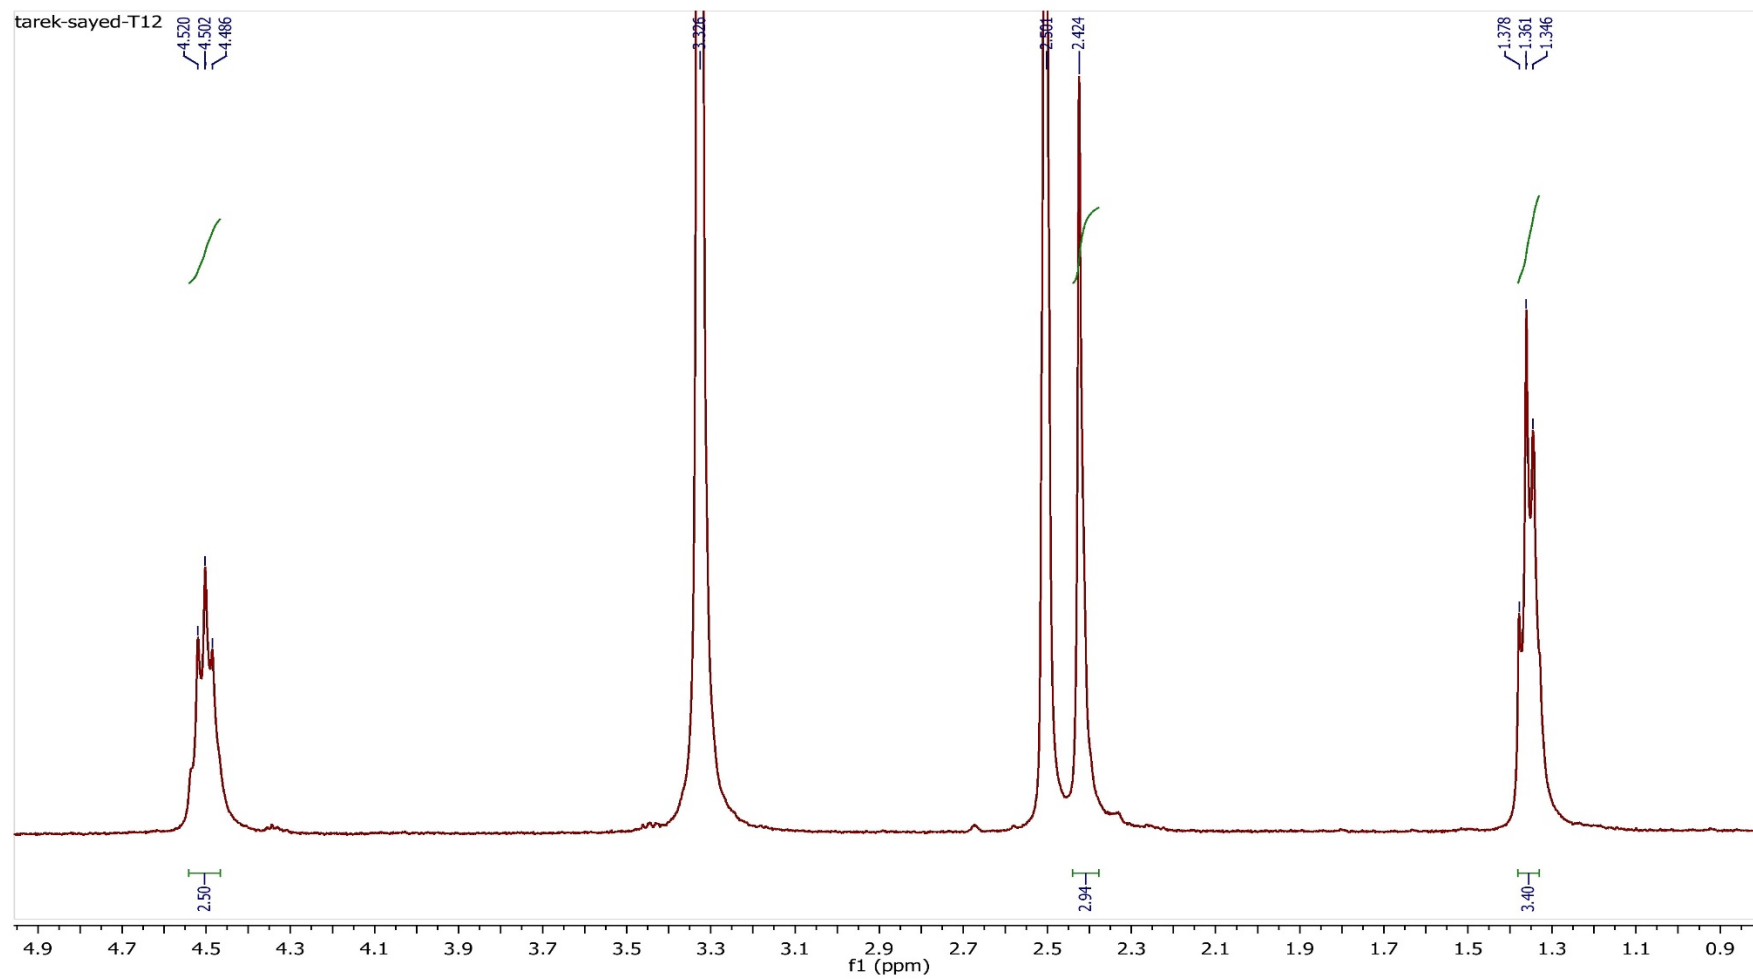

**Figure S28:** The enlargement of upfield region in  $^1\text{H}$ -NMR spectrum of compound **4d**.

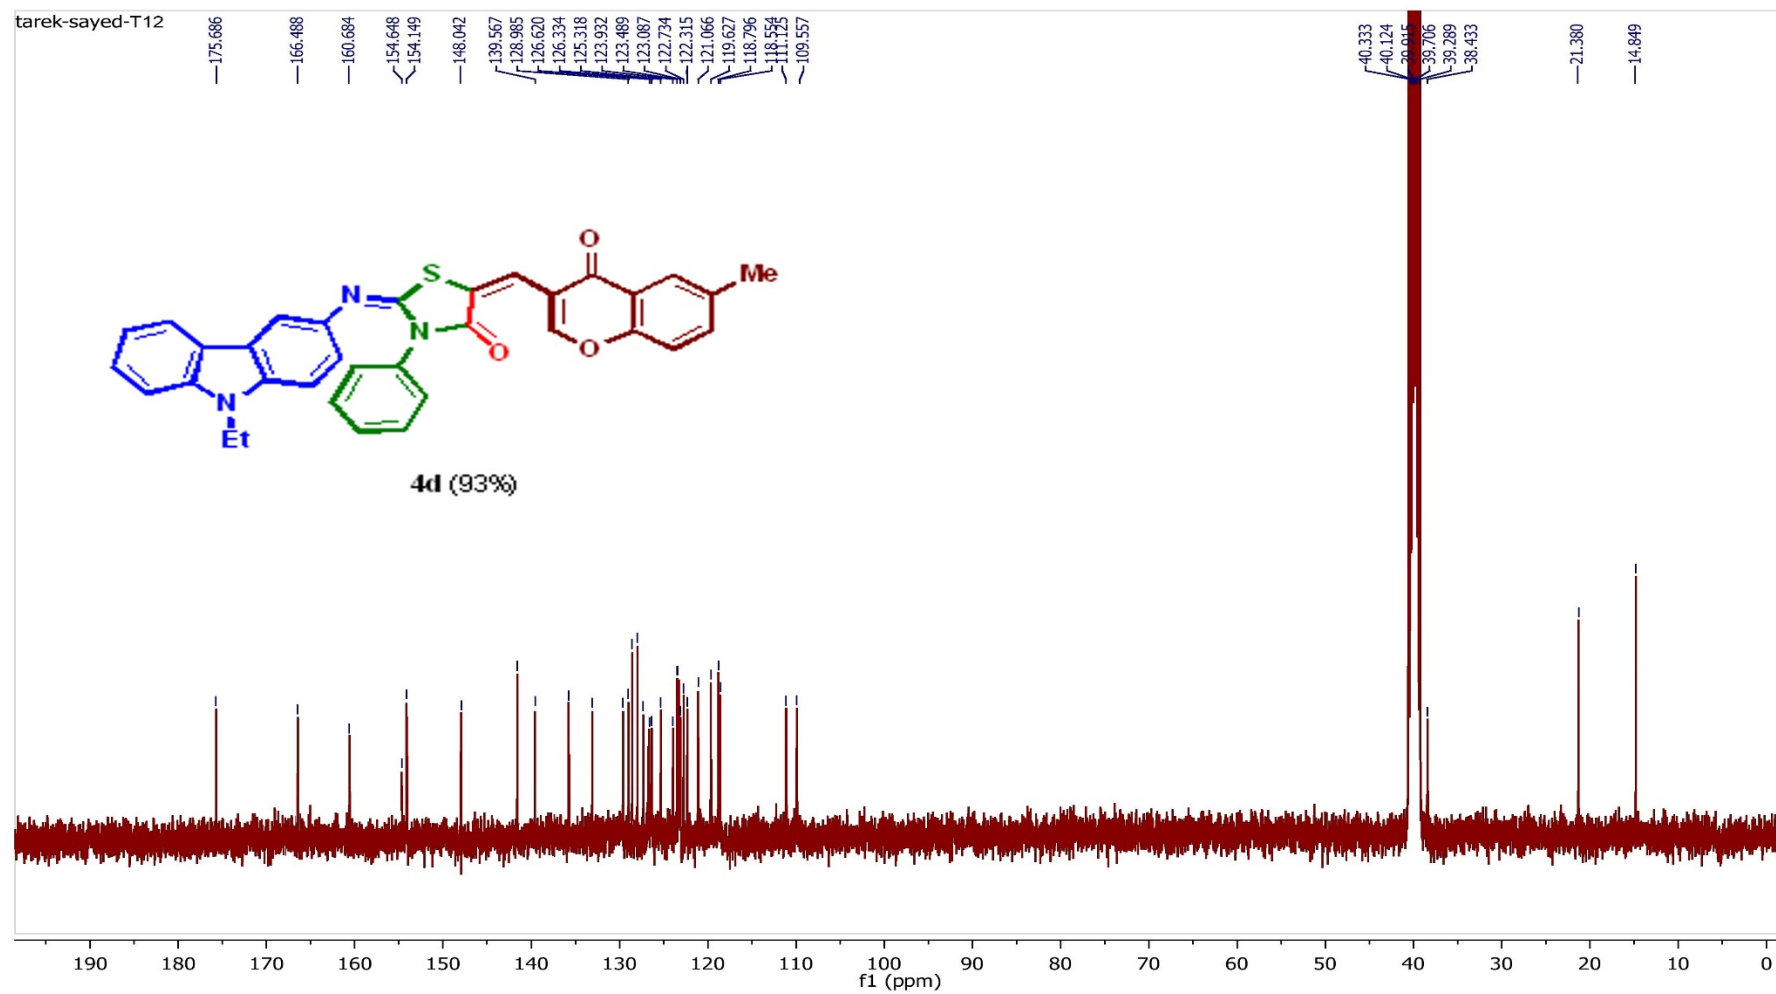

**Figure S29:** The  $^{13}\text{C}$ -NMR spectrum of compound **4d**.

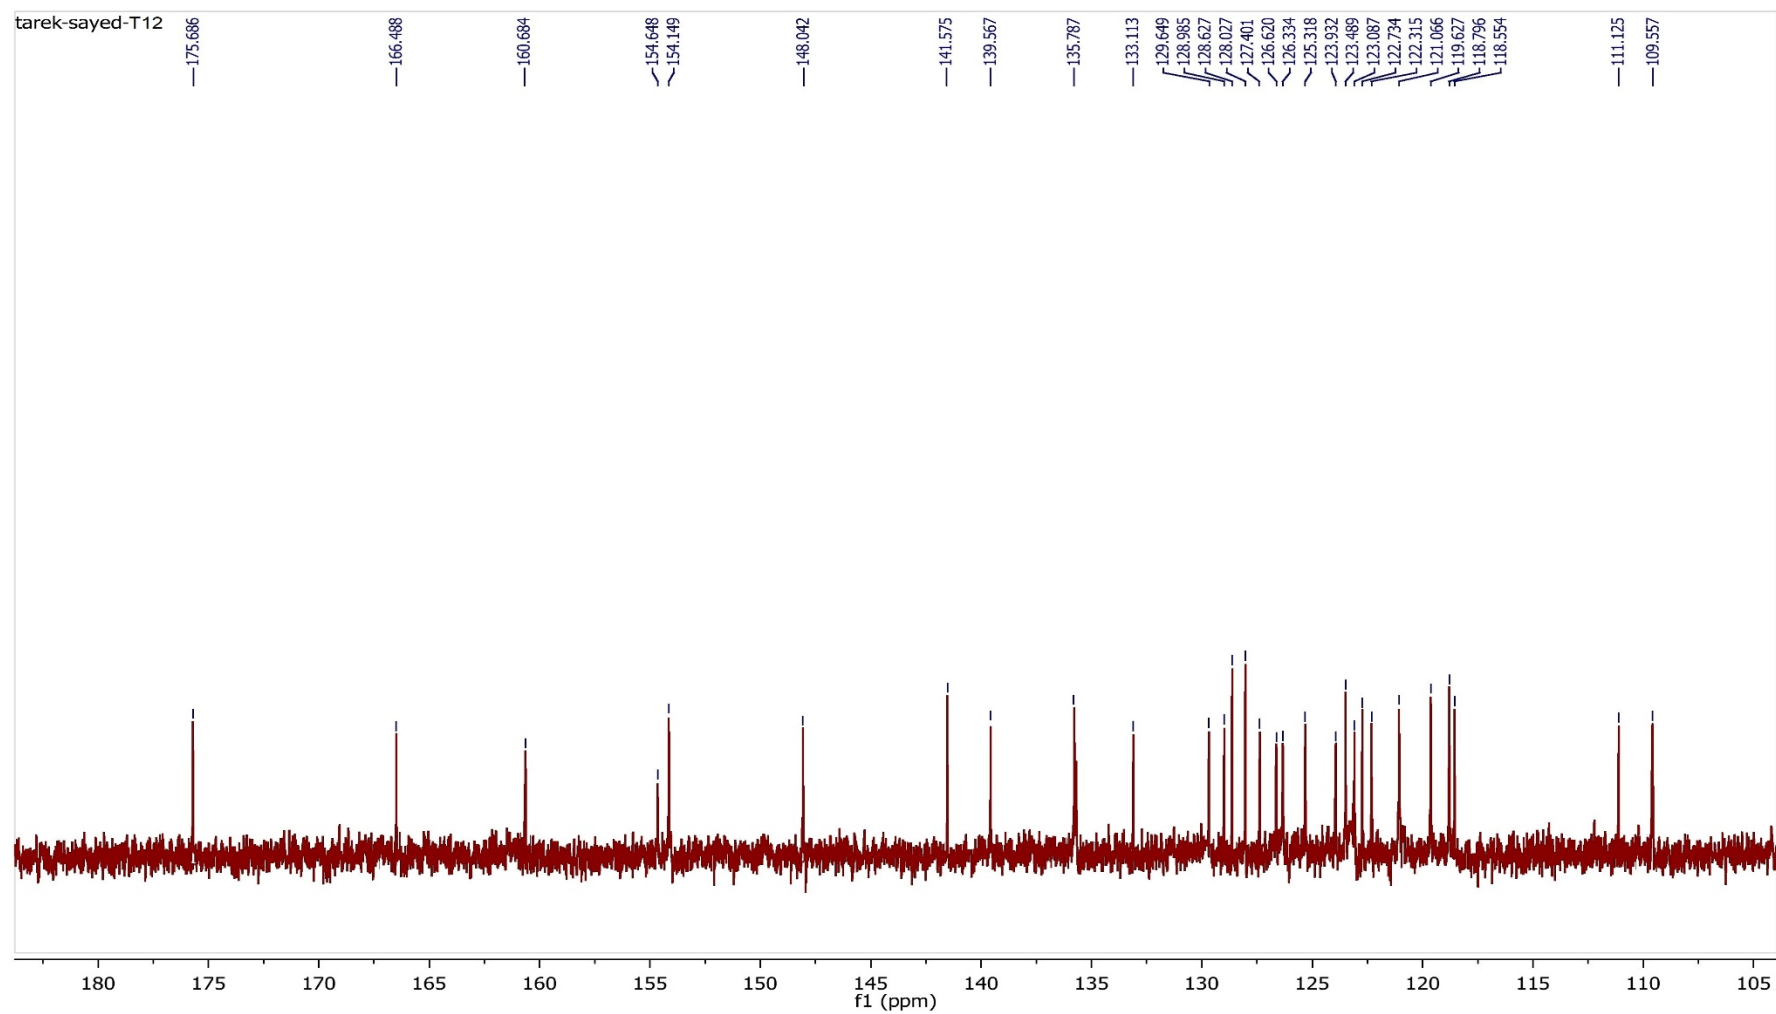

**Figure S30:** The enlargement of downfield region in  $^{13}\text{C}$ -NMR spectrum of compound **4d**.

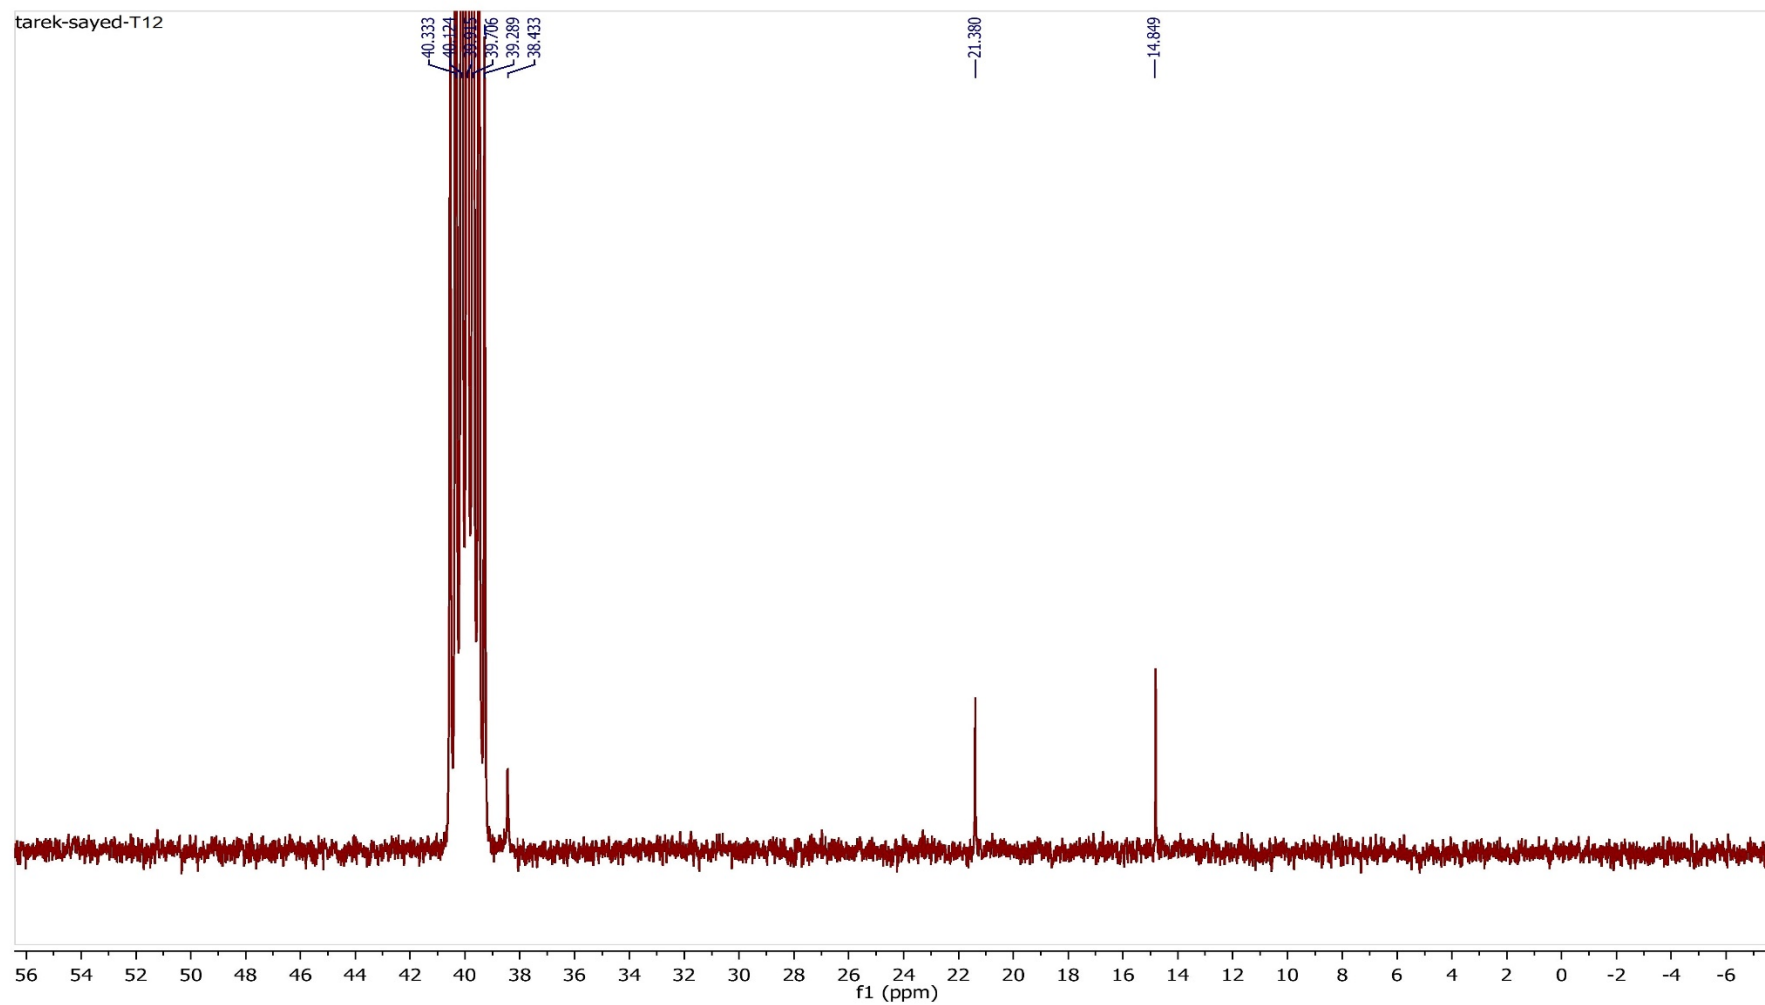

**Figure S31:** The enlargement of upfield region in  $^{13}\text{C}$ -NMR spectrum of compound **4d**.

tarek-T12 #29 RT: 0.50 AV: 1 SB: 2 0.97, 1.05 NL: 0.02E2  
T: {0,0} + e EI Full ms [40.00-1000.00]

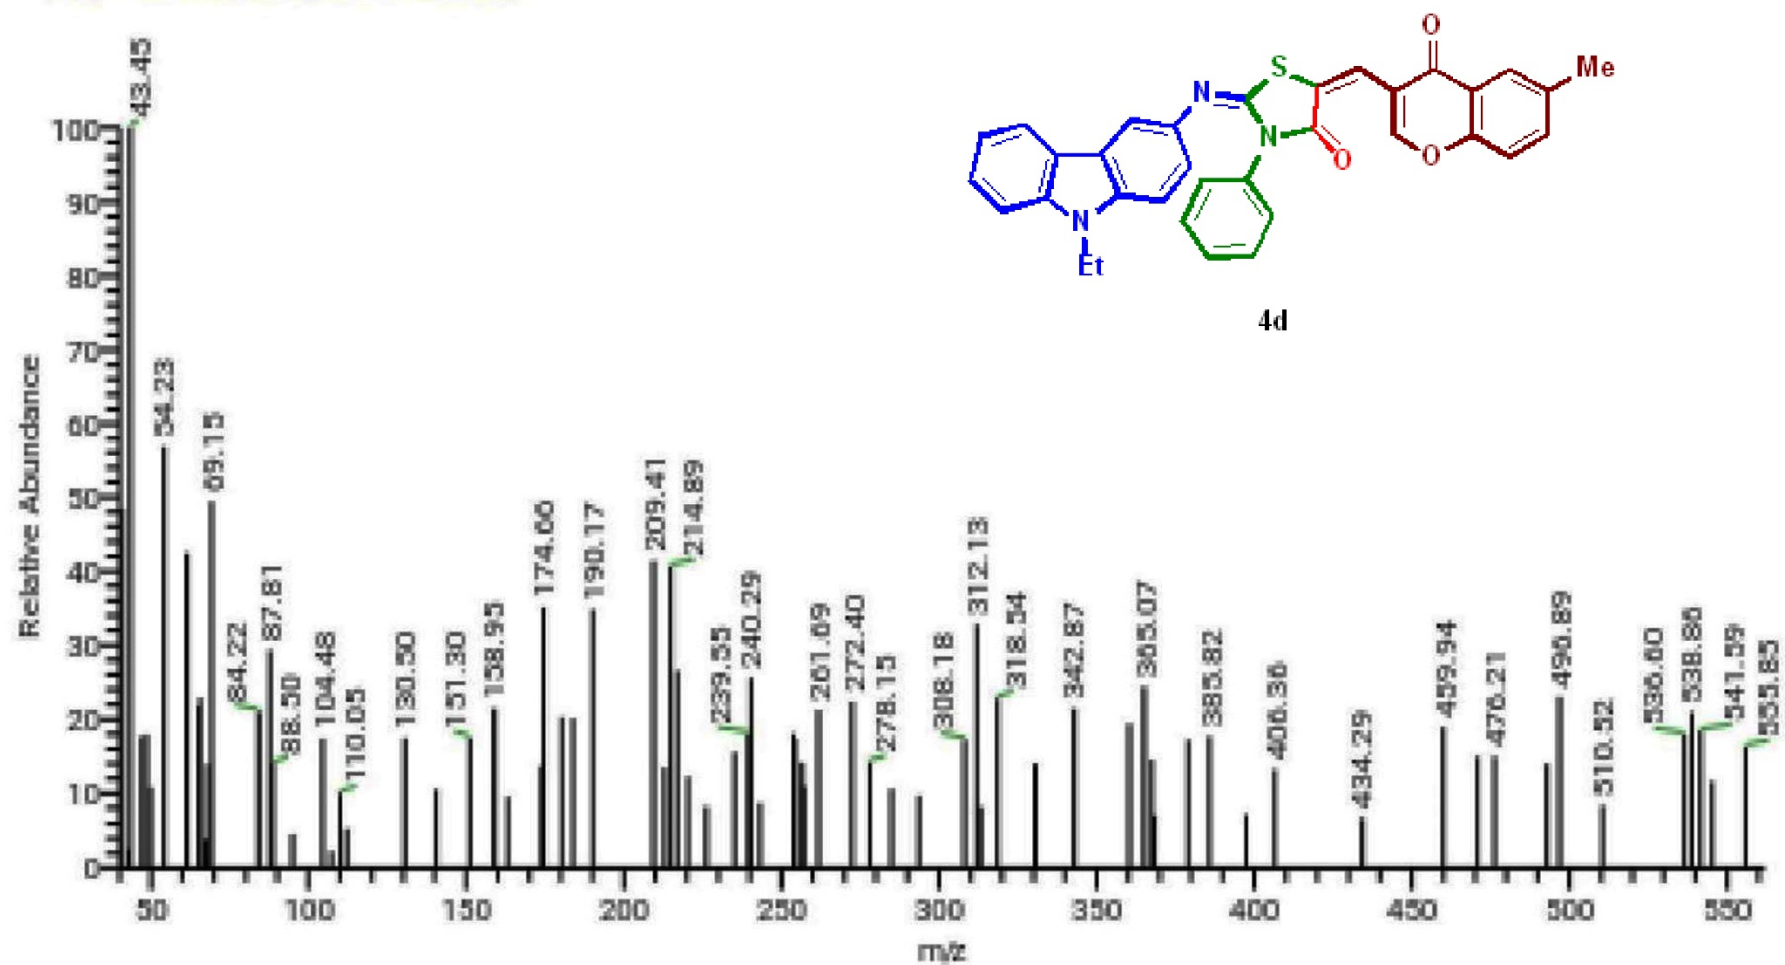

Figure S32: The mass spectrum of compound 4d.

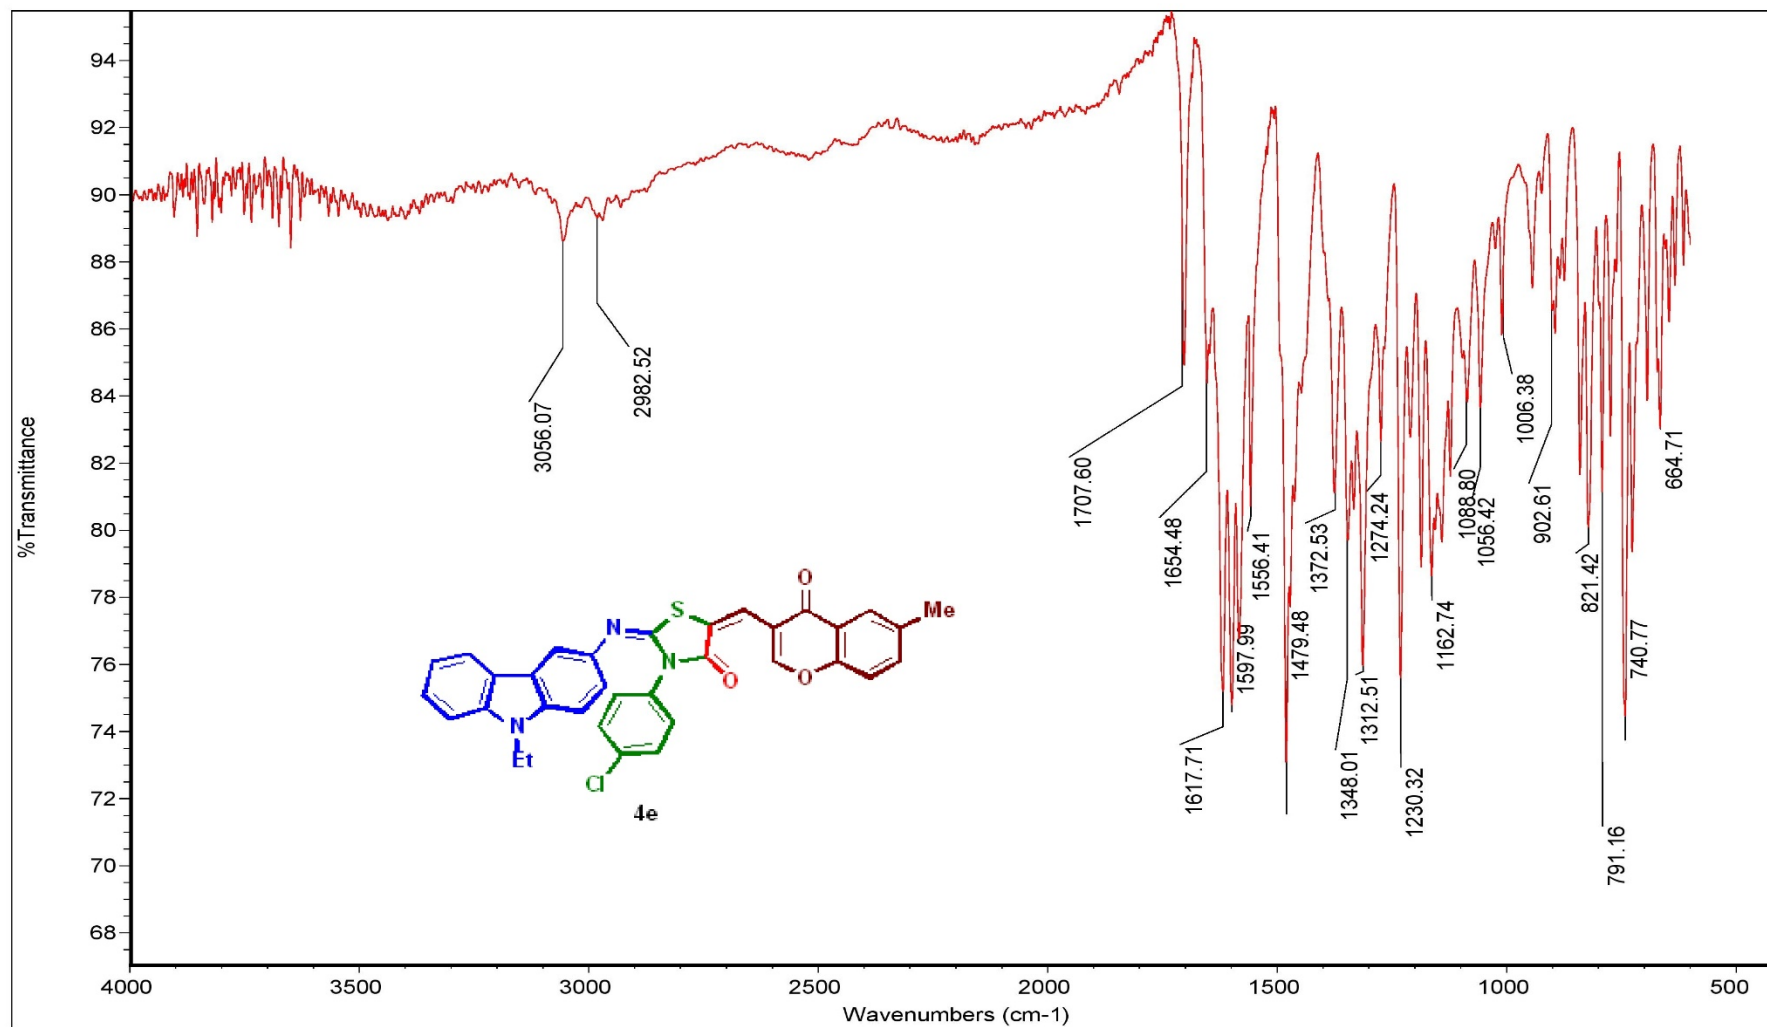

**Figure S33:** The IR spectrum of compound **4e**.

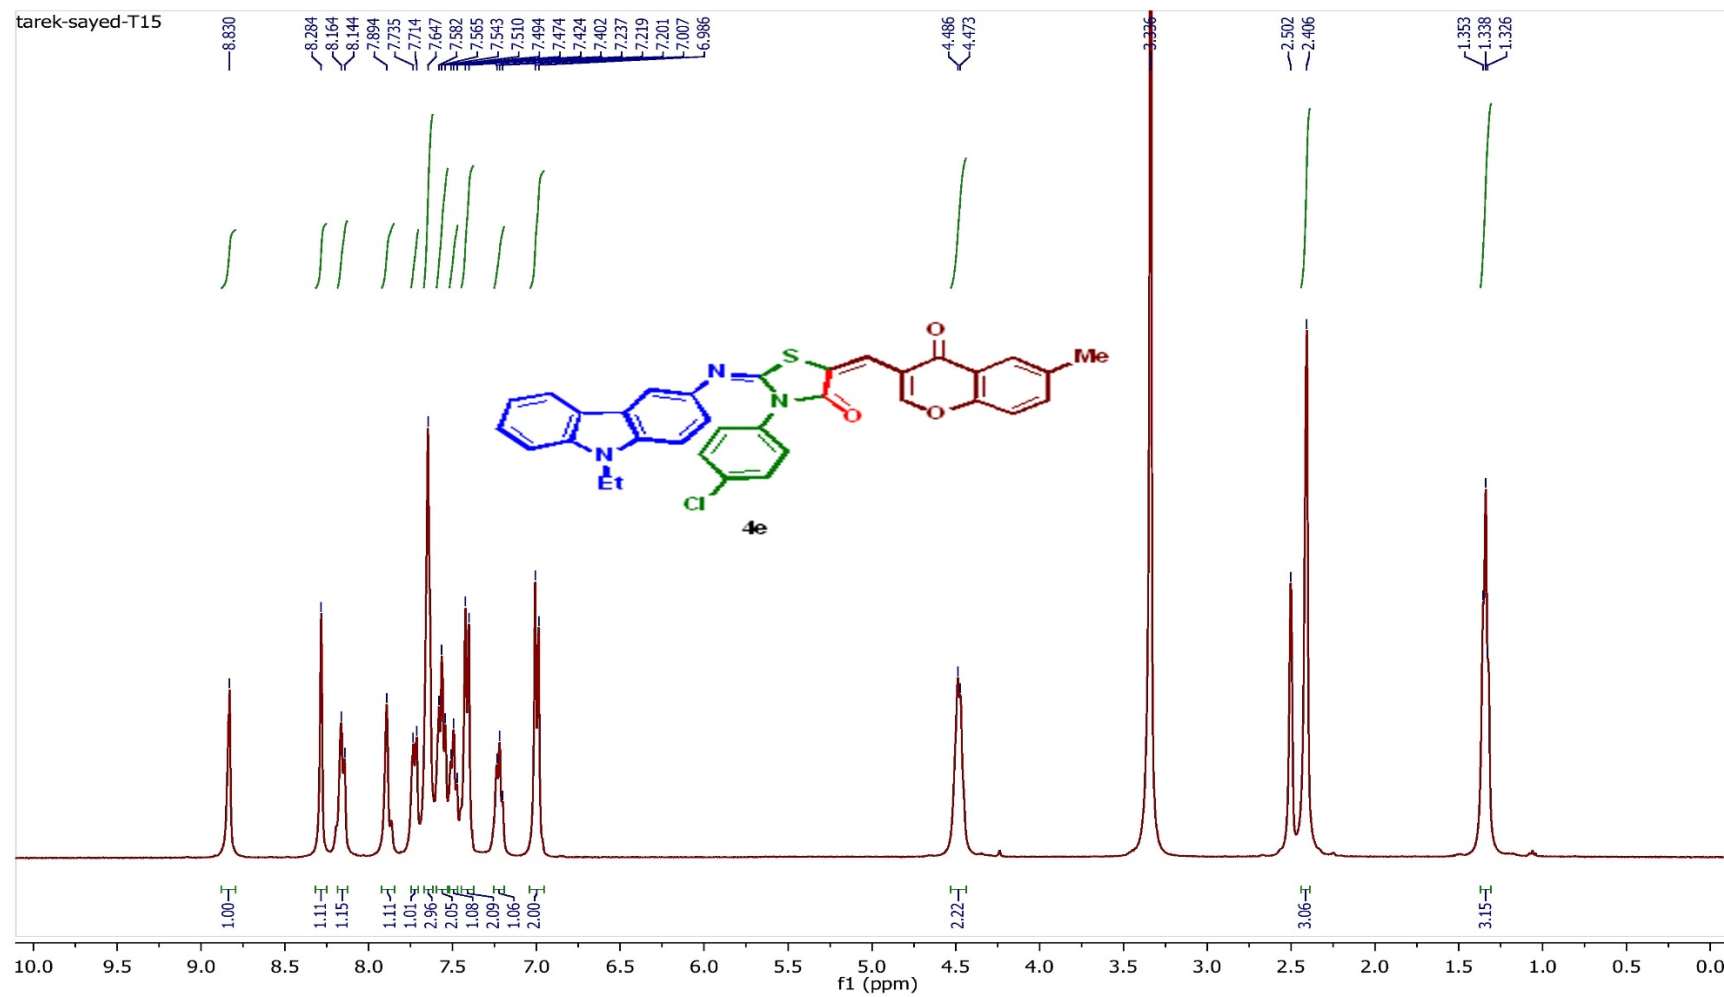

**Figure S34:** The  $^1\text{H}$ -NMR spectrum of compound **4e**.

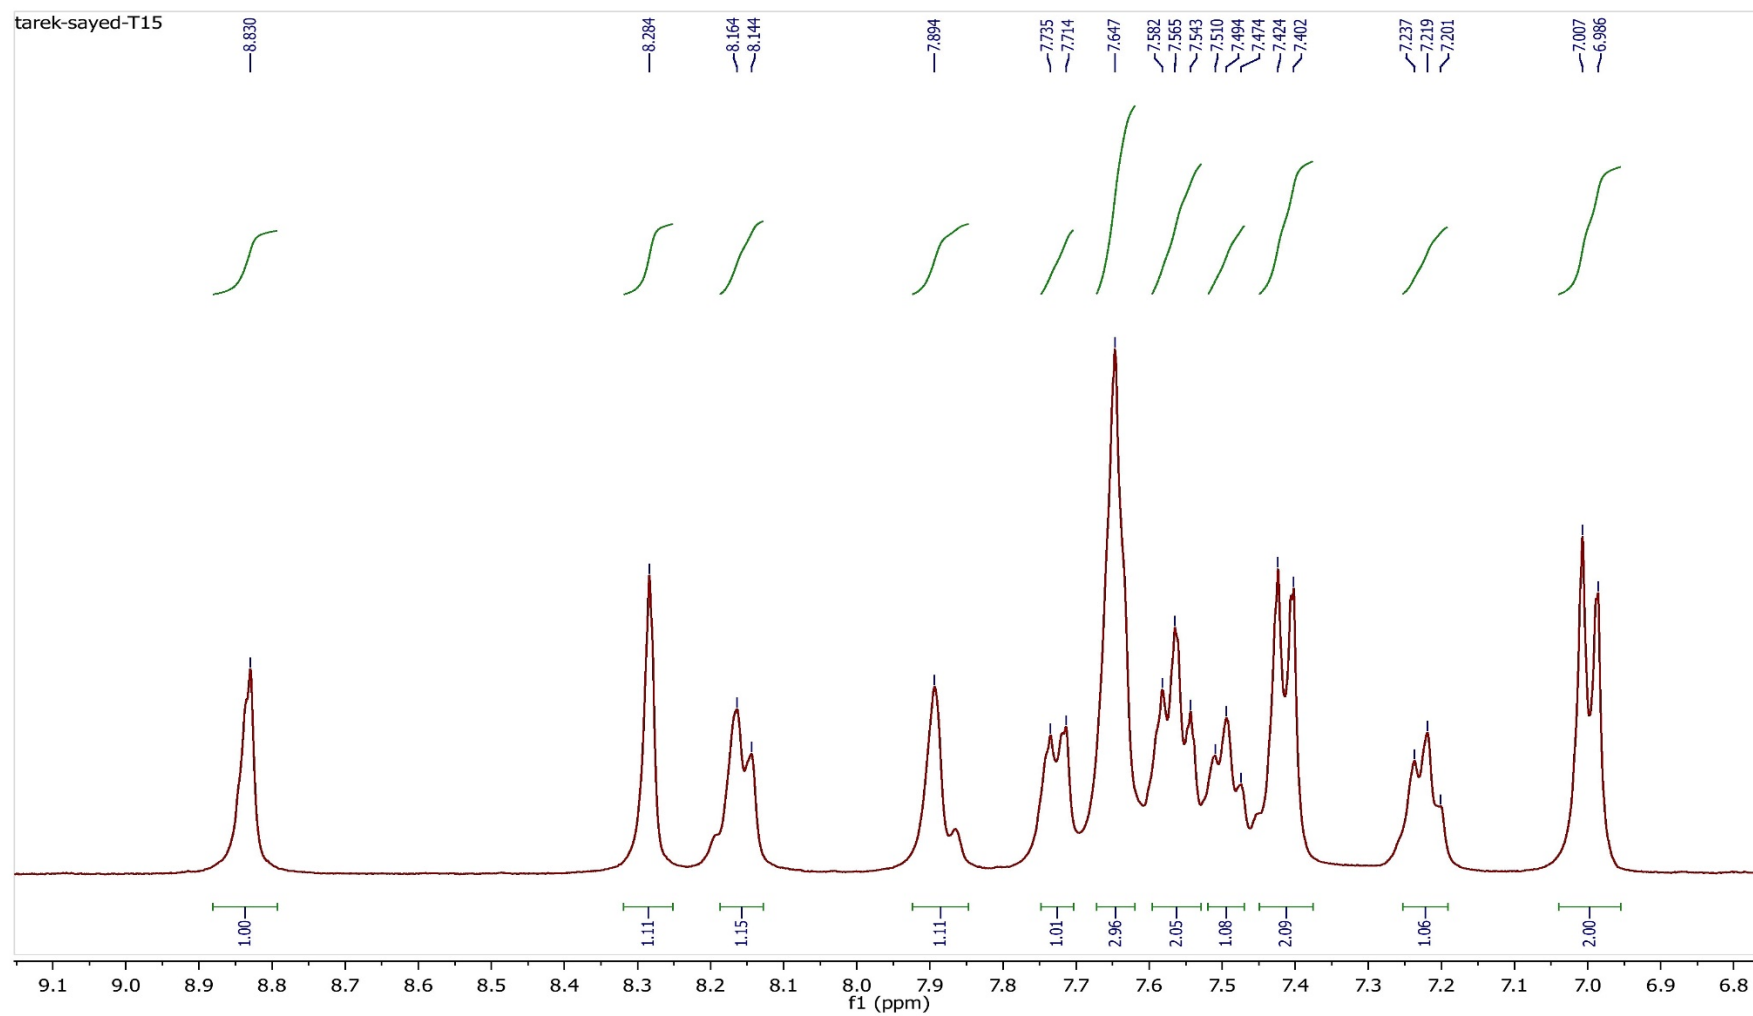

**Figure S35:** The enlargement of downfield region in  $^1\text{H}$ -NMR spectrum of compound **4e**.



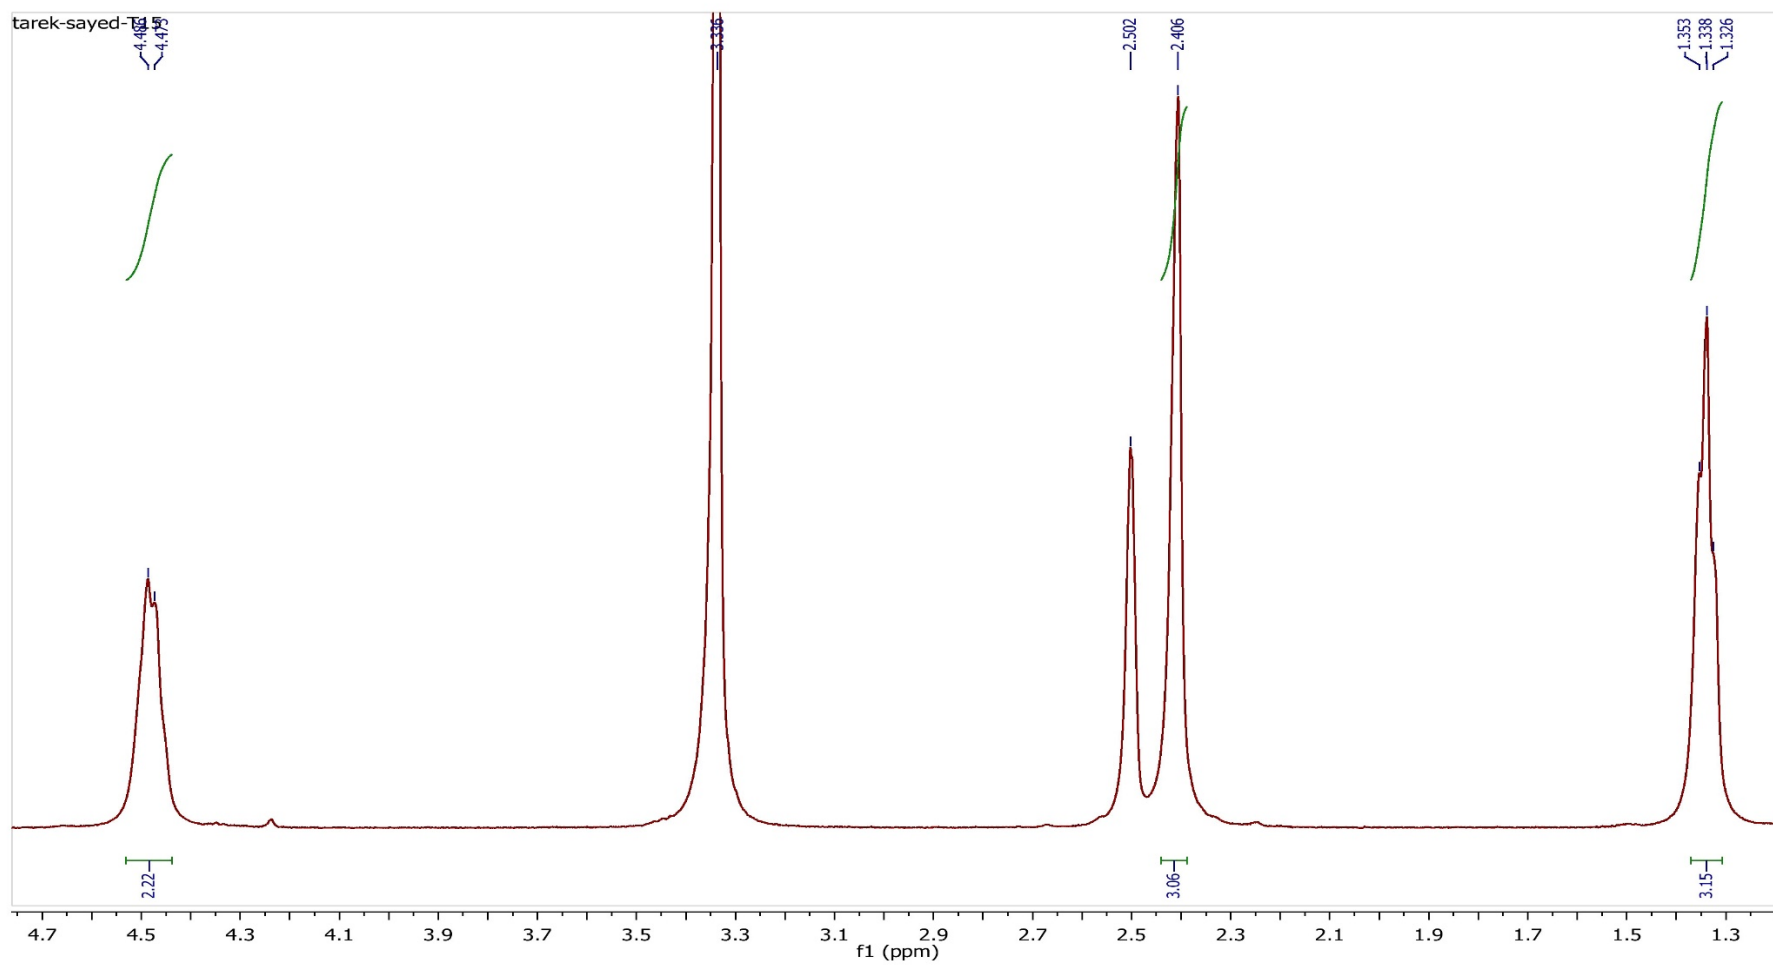

**Figure S36:** The enlargement of upfield region in  $^1\text{H}$ -NMR spectrum of compound 4e.

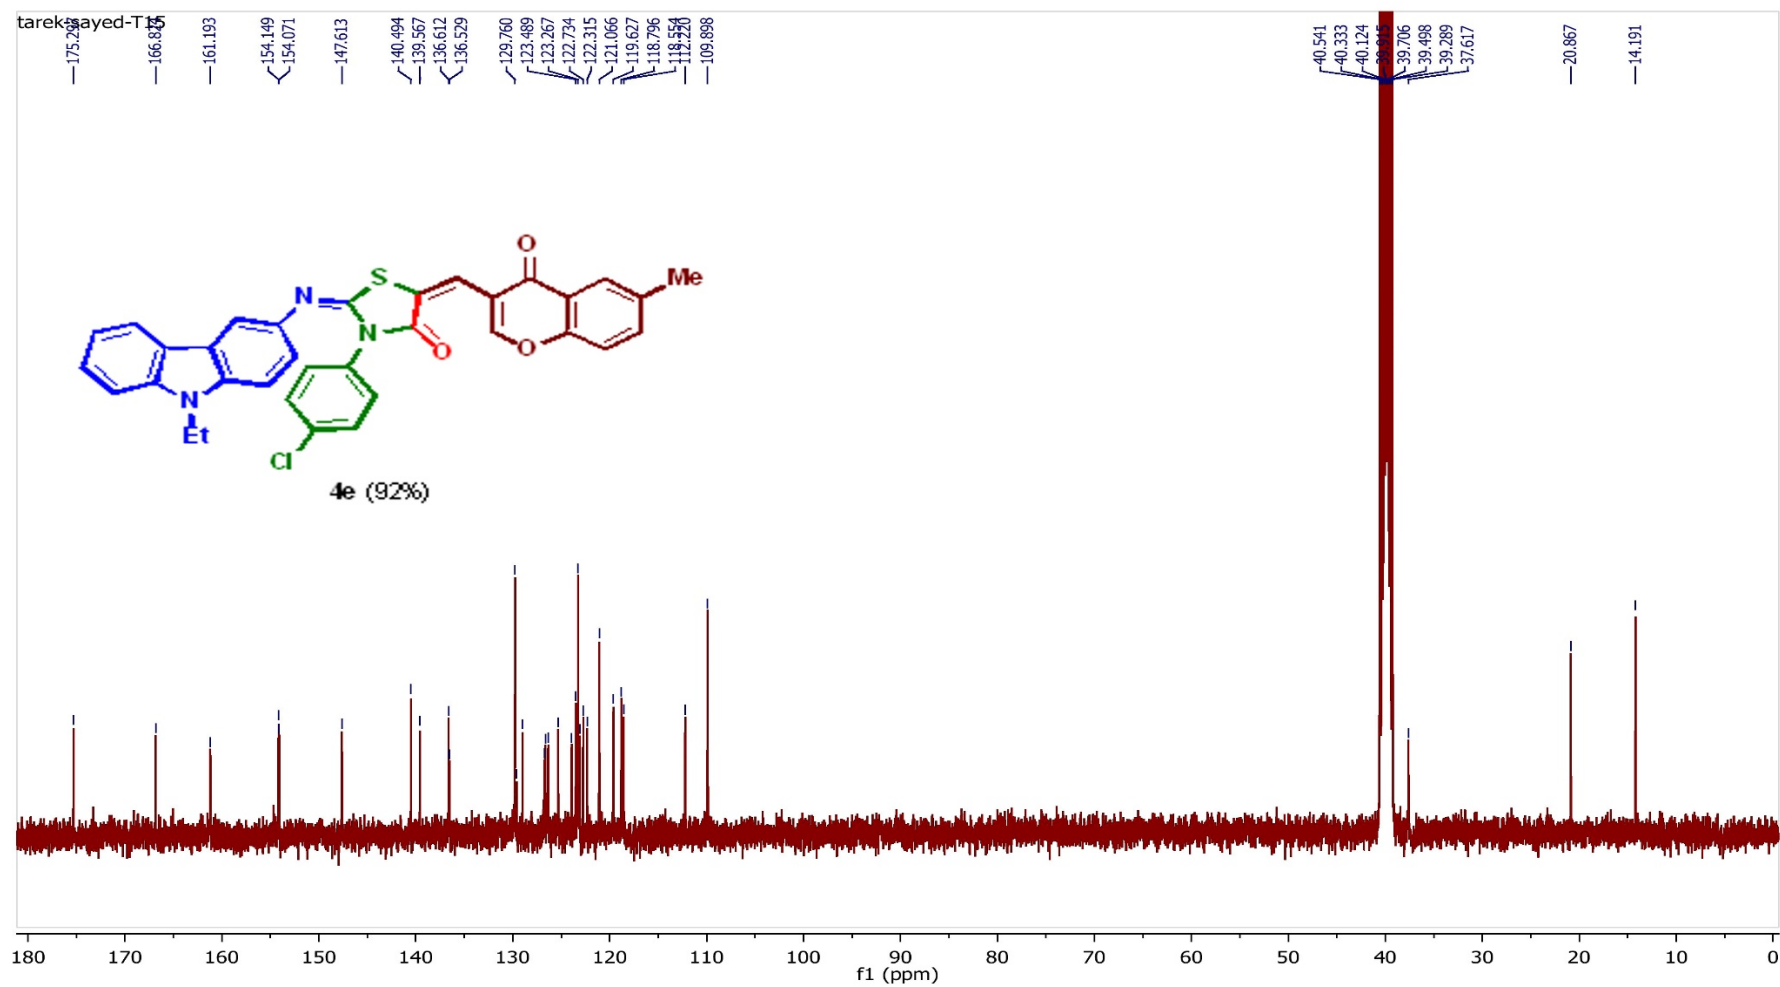

**Figure S37:** The  $^{13}\text{C}$ -NMR spectrum of compound **4e**.

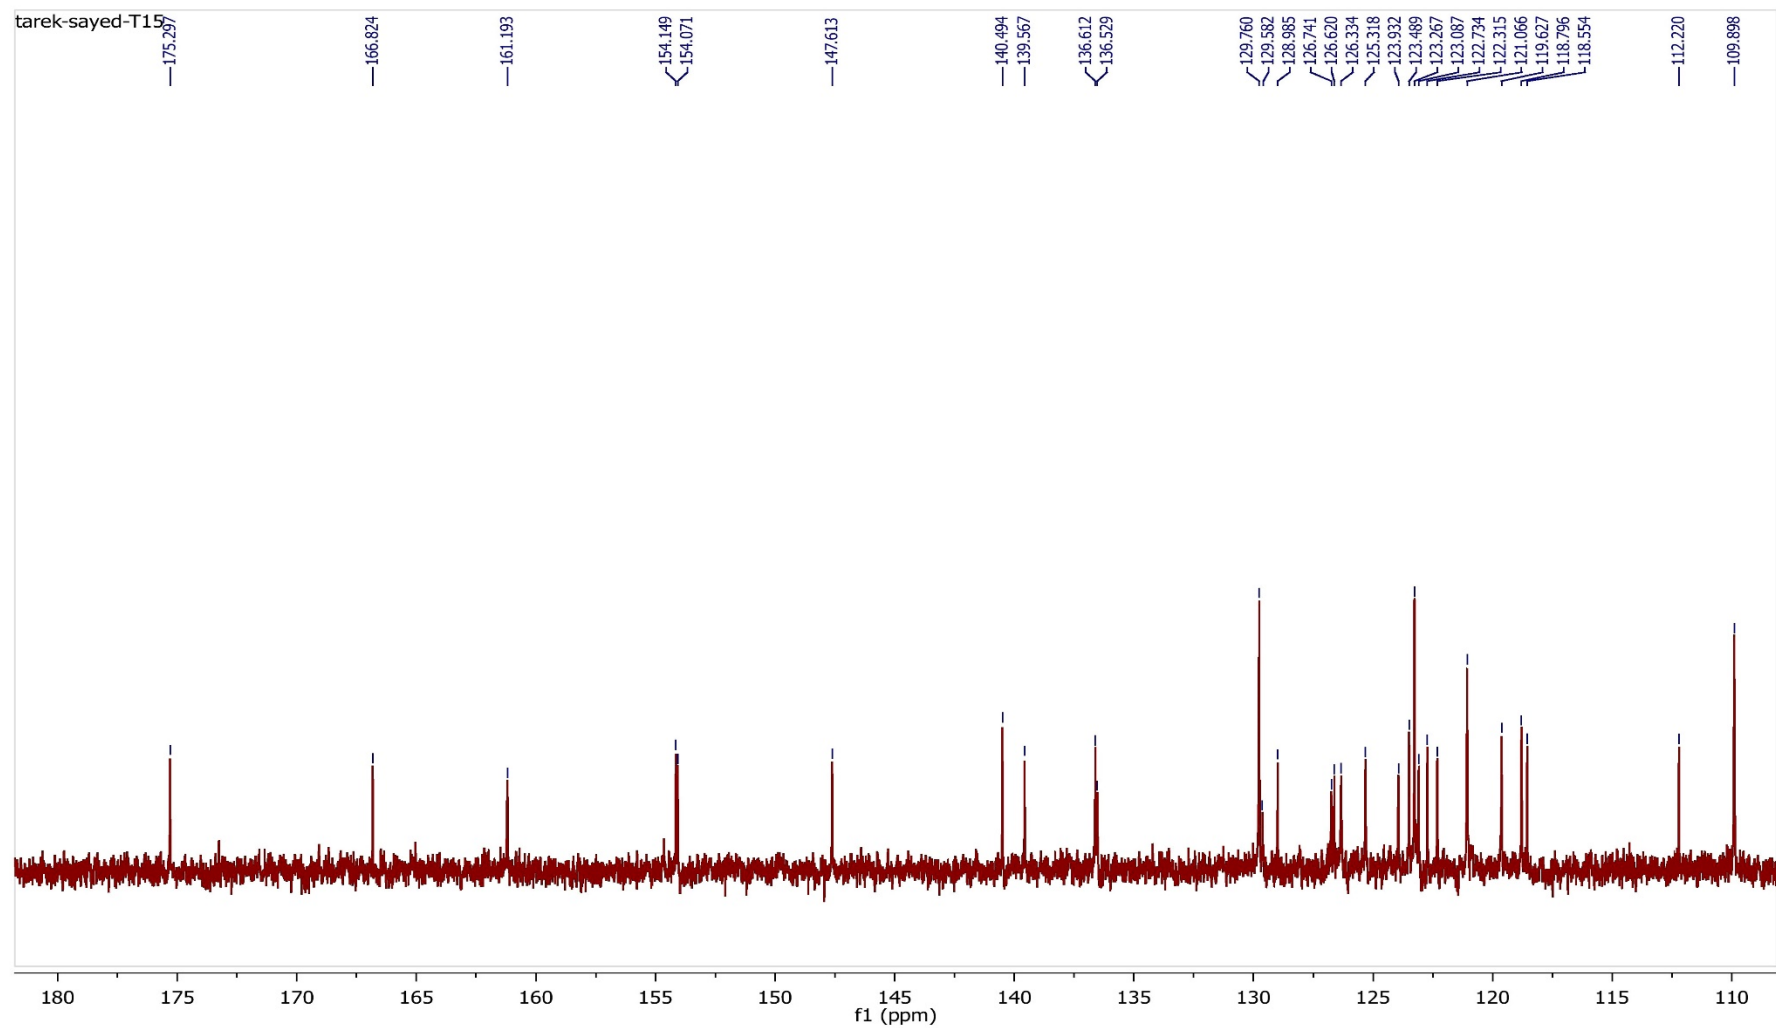

**Figure S38:** The enlargement of downfield region in  $^{13}\text{C}$ -NMR spectrum of compound **4e**.

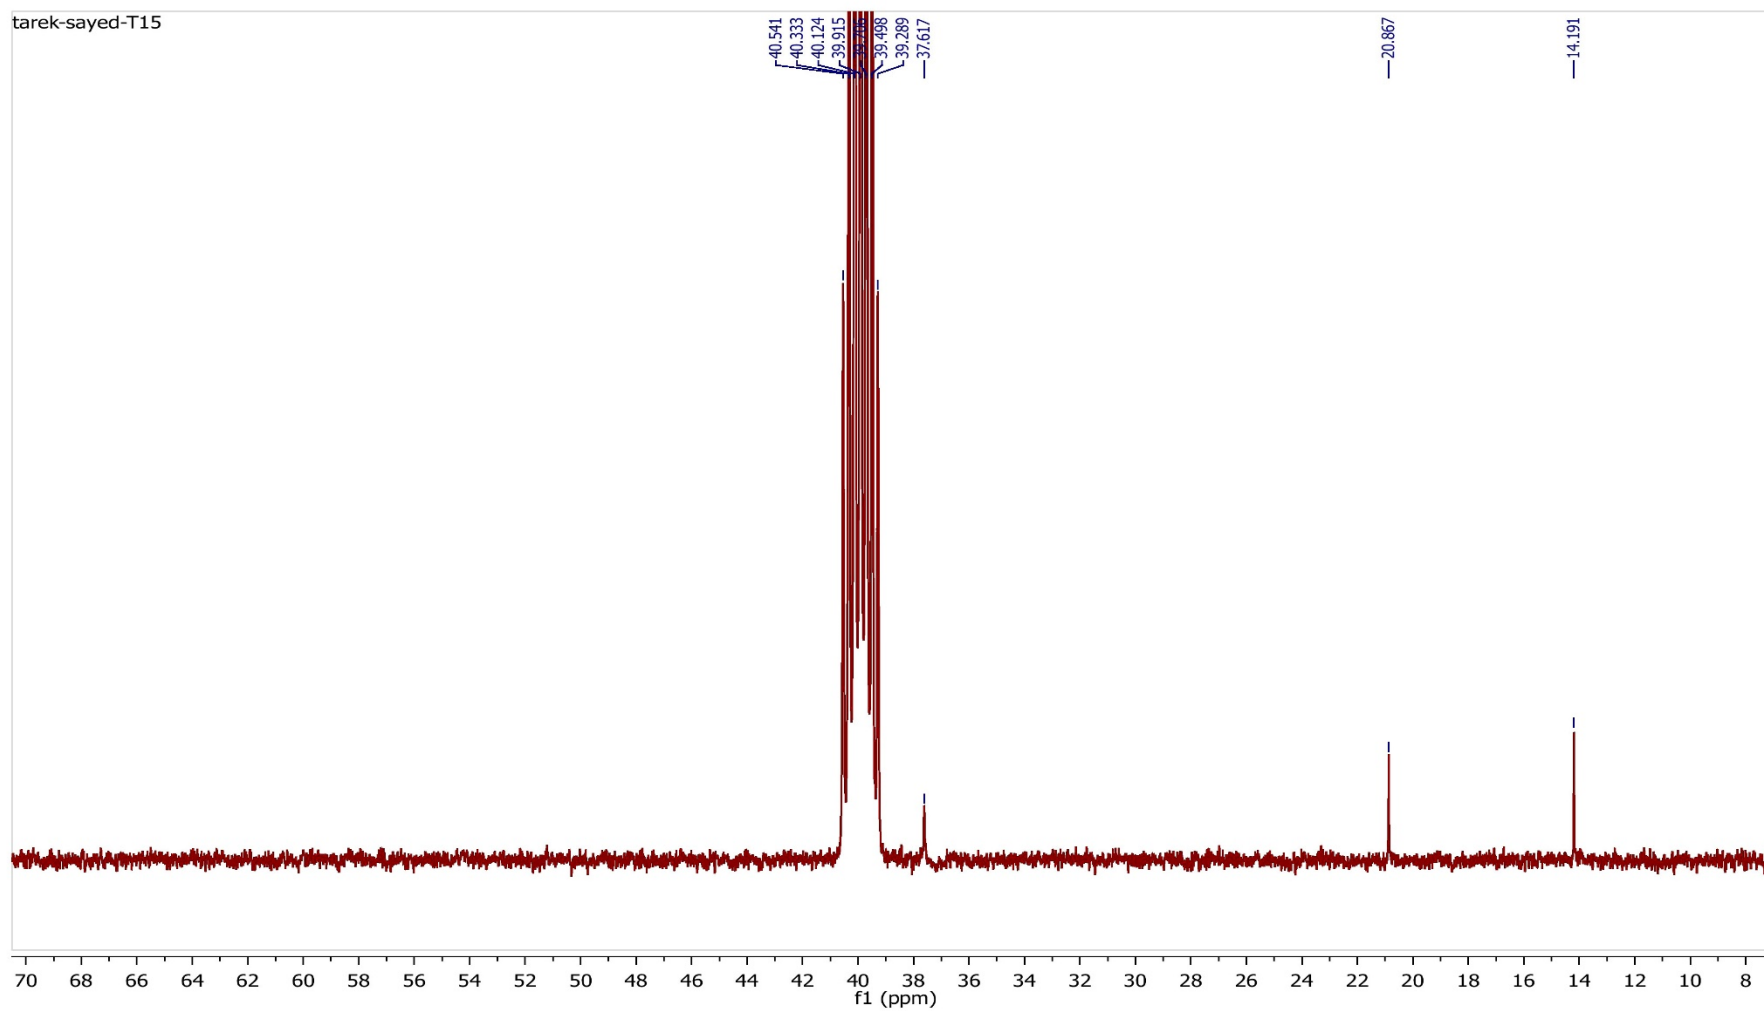

**Figure S39:** The enlargement of upfield region in  $^{13}\text{C}$ -NMR spectrum of compound **4e**.

tarek-T15 #277 RT: 4.65 AV: 1 SB: 2 3.82, 3.53 NL: 4.34E2  
T: (0,0) + e EI Full ms [40.00-1000.00]

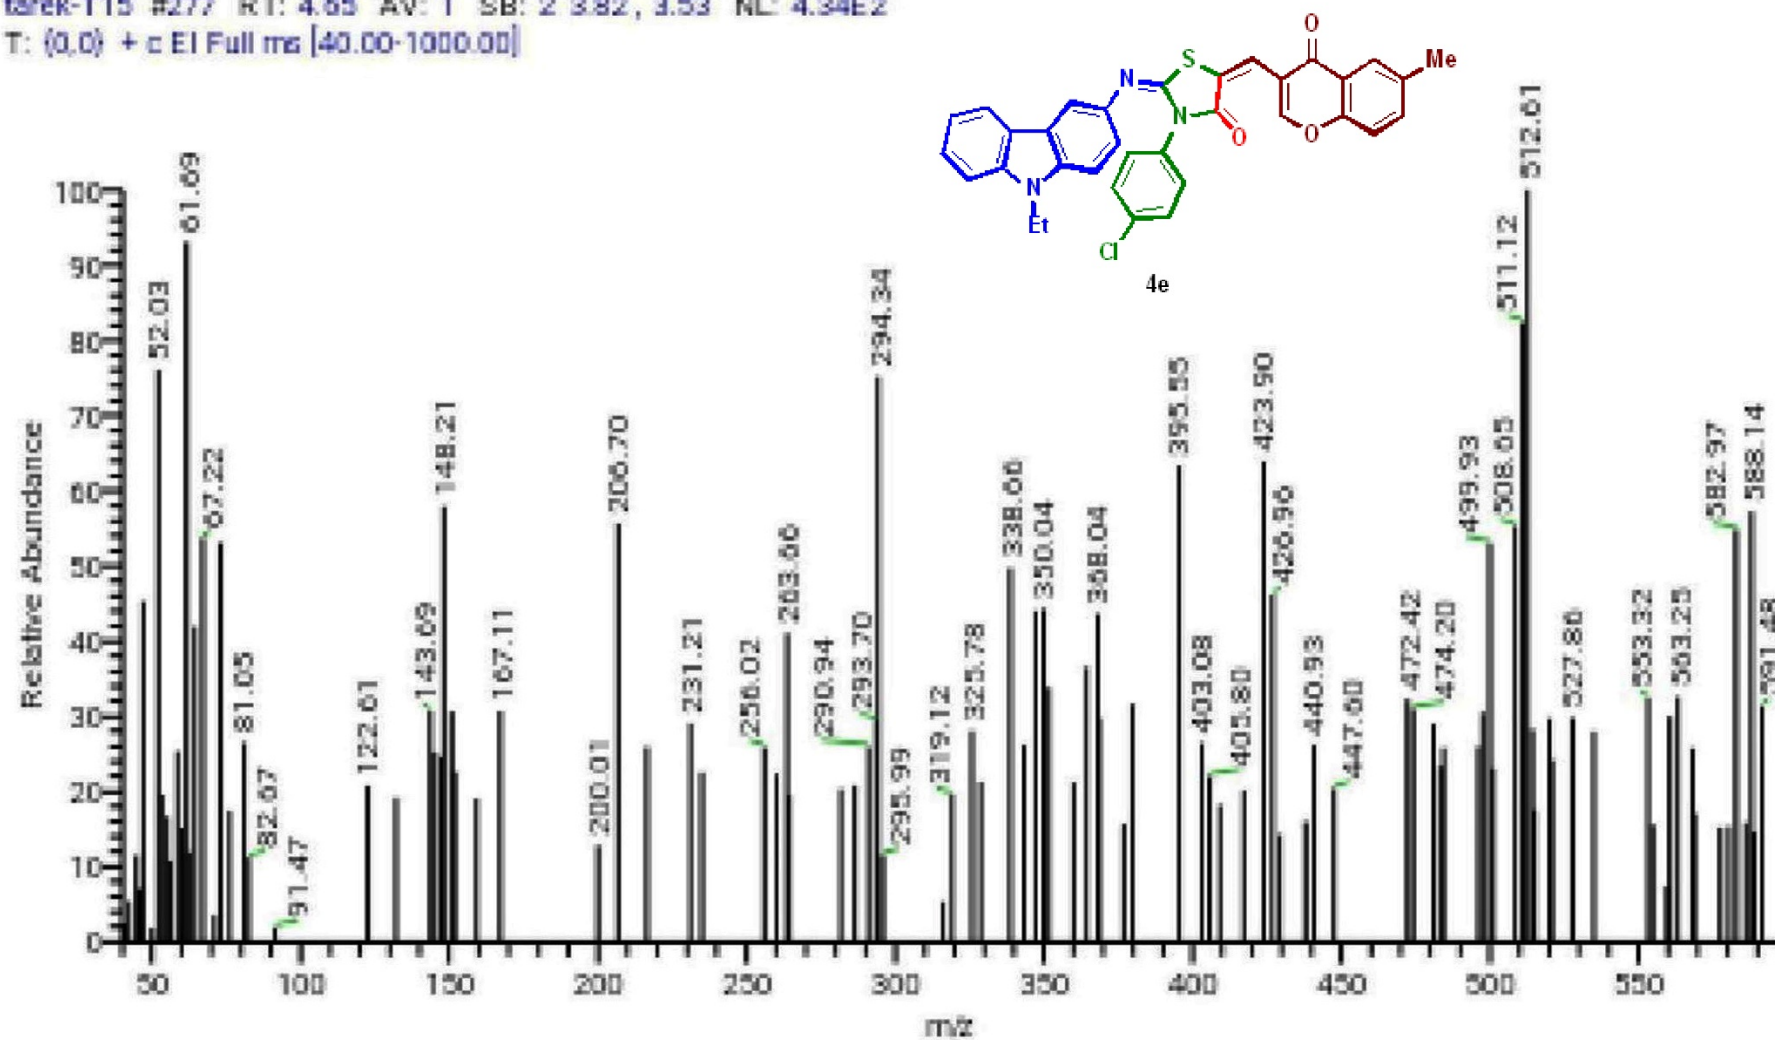

Figure S40: The mass spectrum of compound 4e.

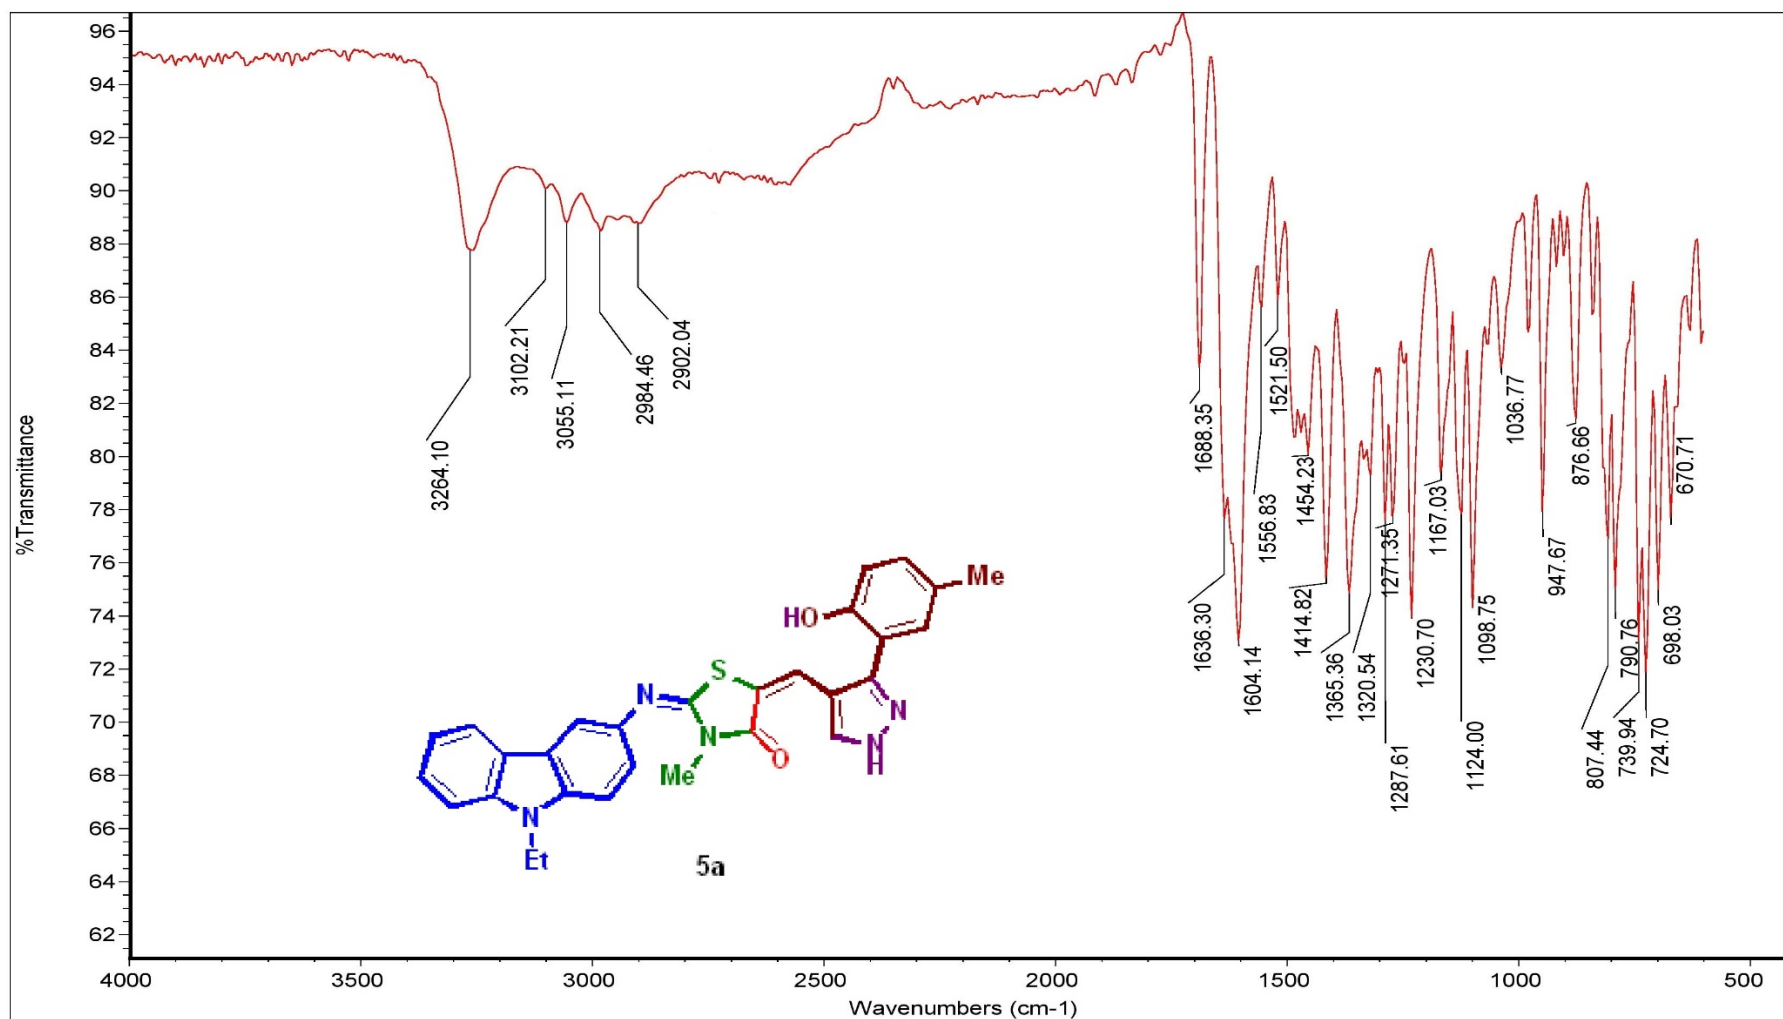

**Figure S41:** The IR spectrum of compound **5a**.

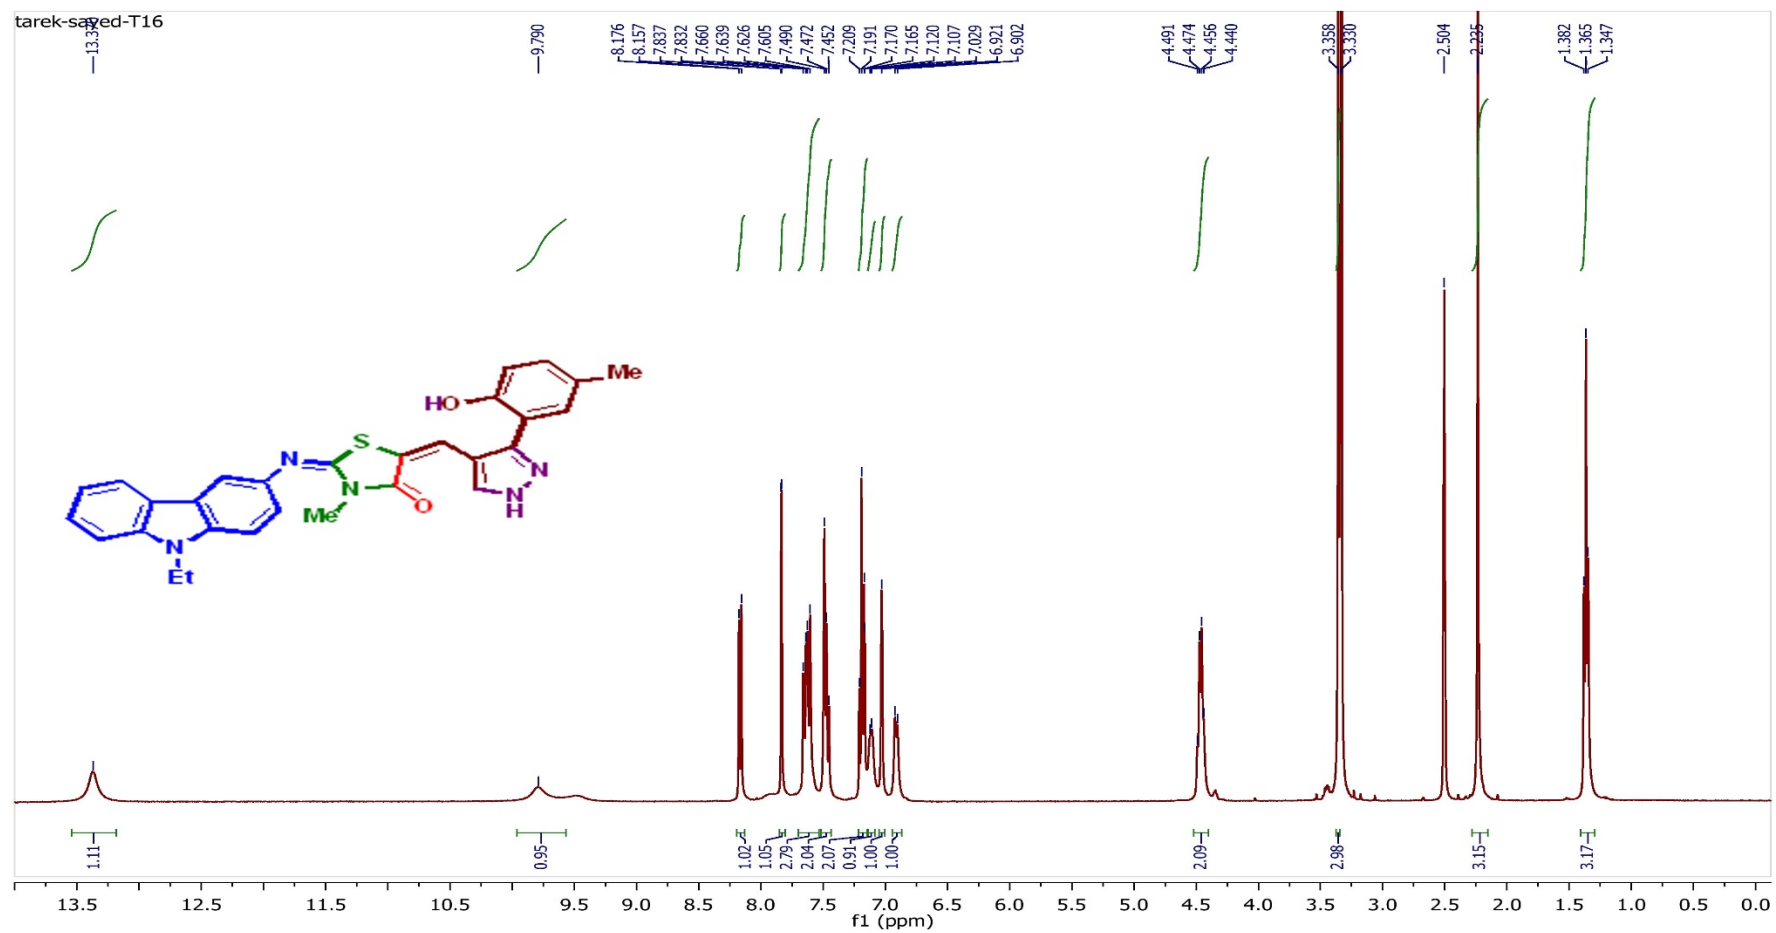

**Figure S42:** The  $^1\text{H}$ -NMR spectrum of compound **5a**.

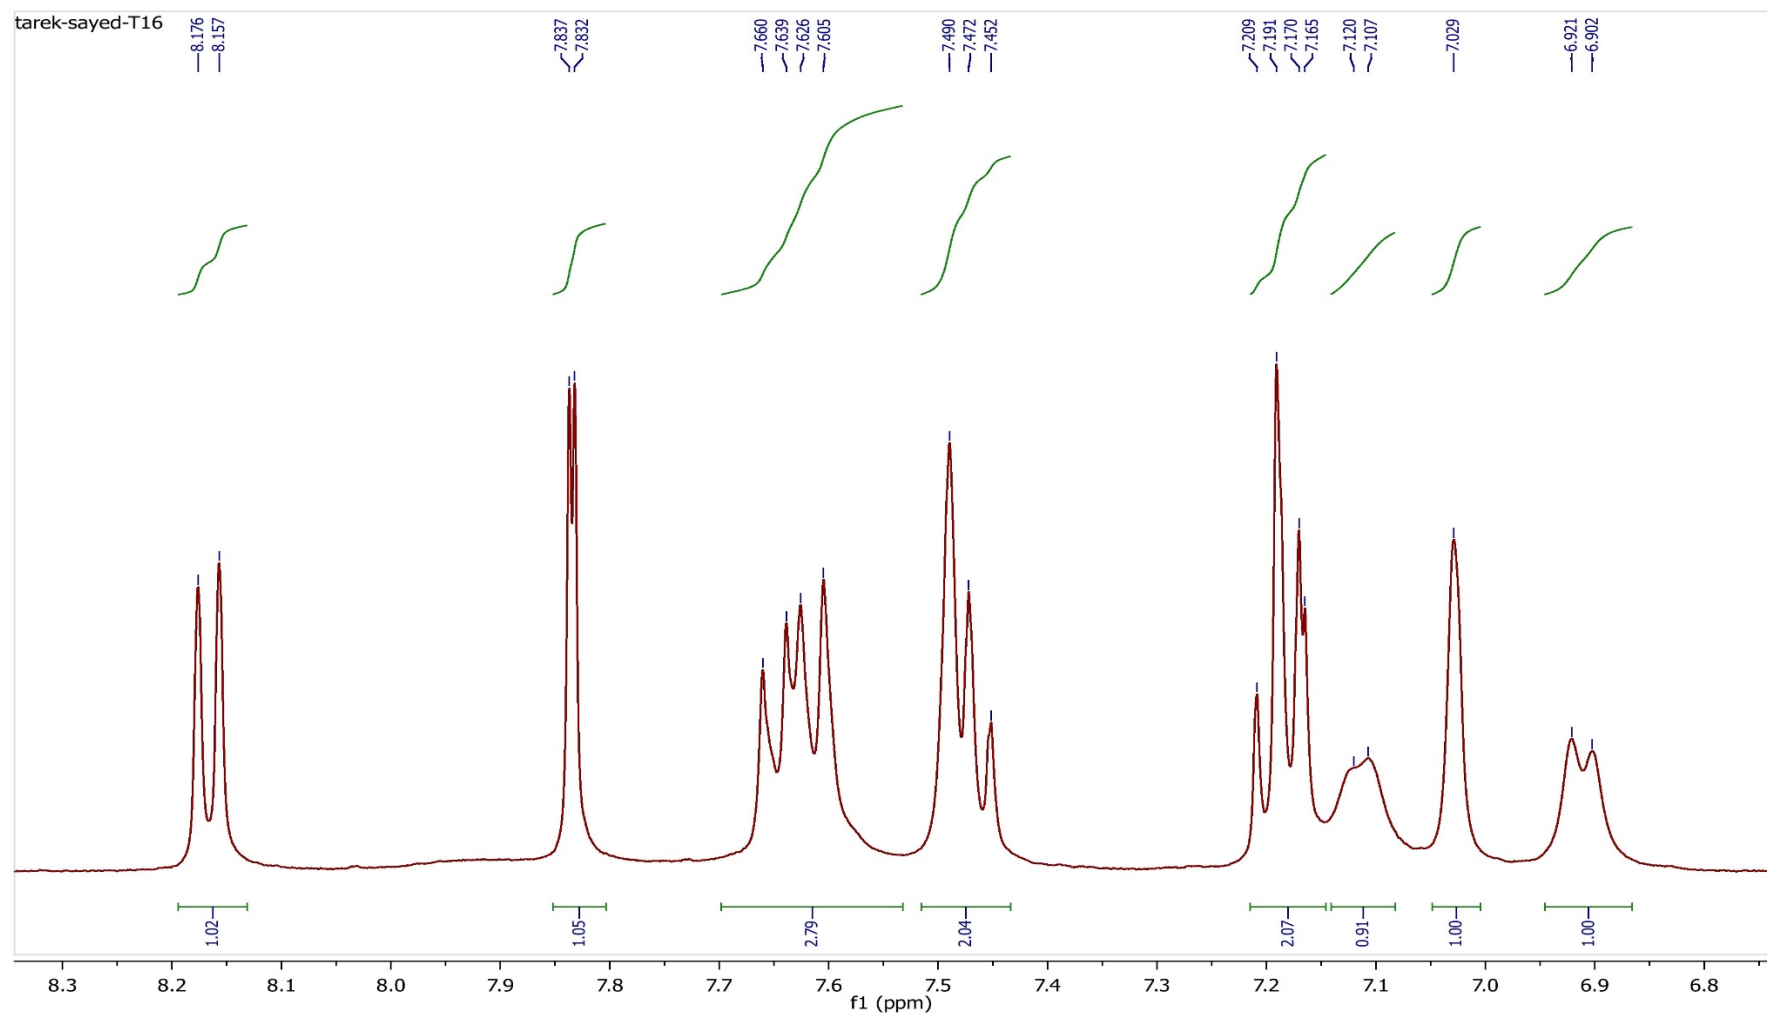

**Figure S43:** The enlargement of downfield region in <sup>1</sup>H-NMR spectrum of compound **5a**.



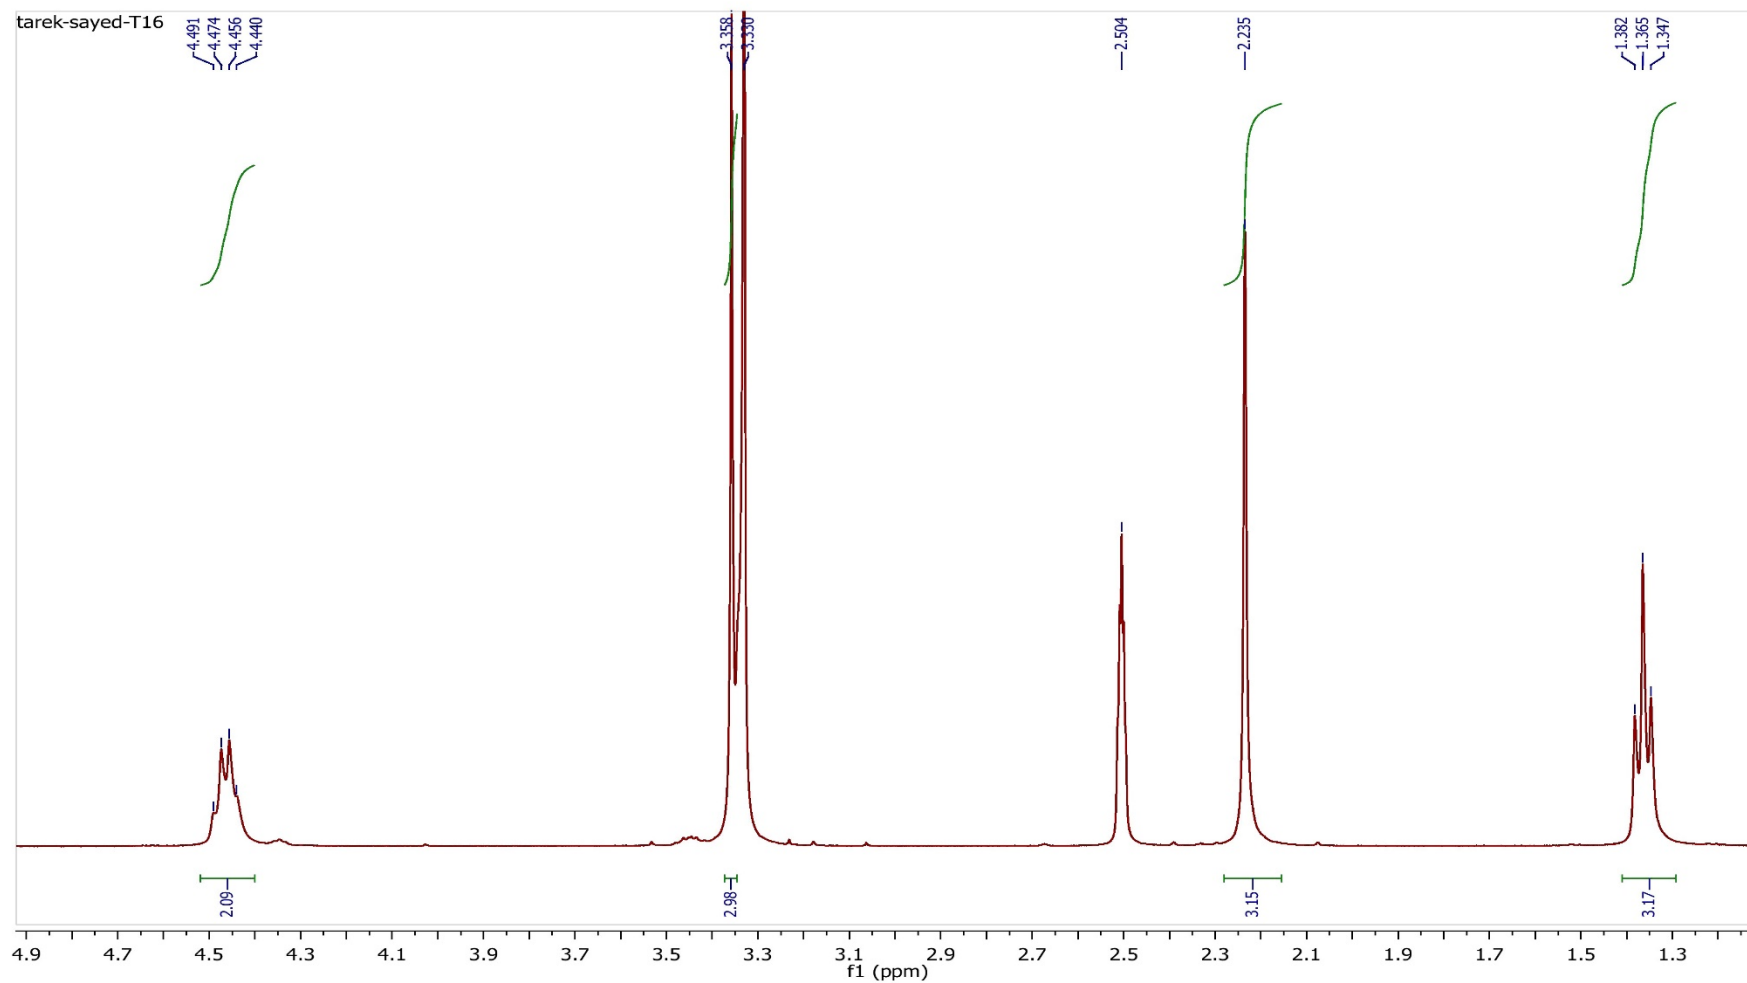

**Figure S44:** The enlargement of upfield region in  $^1\text{H}$ -NMR spectrum of compound **5a**.

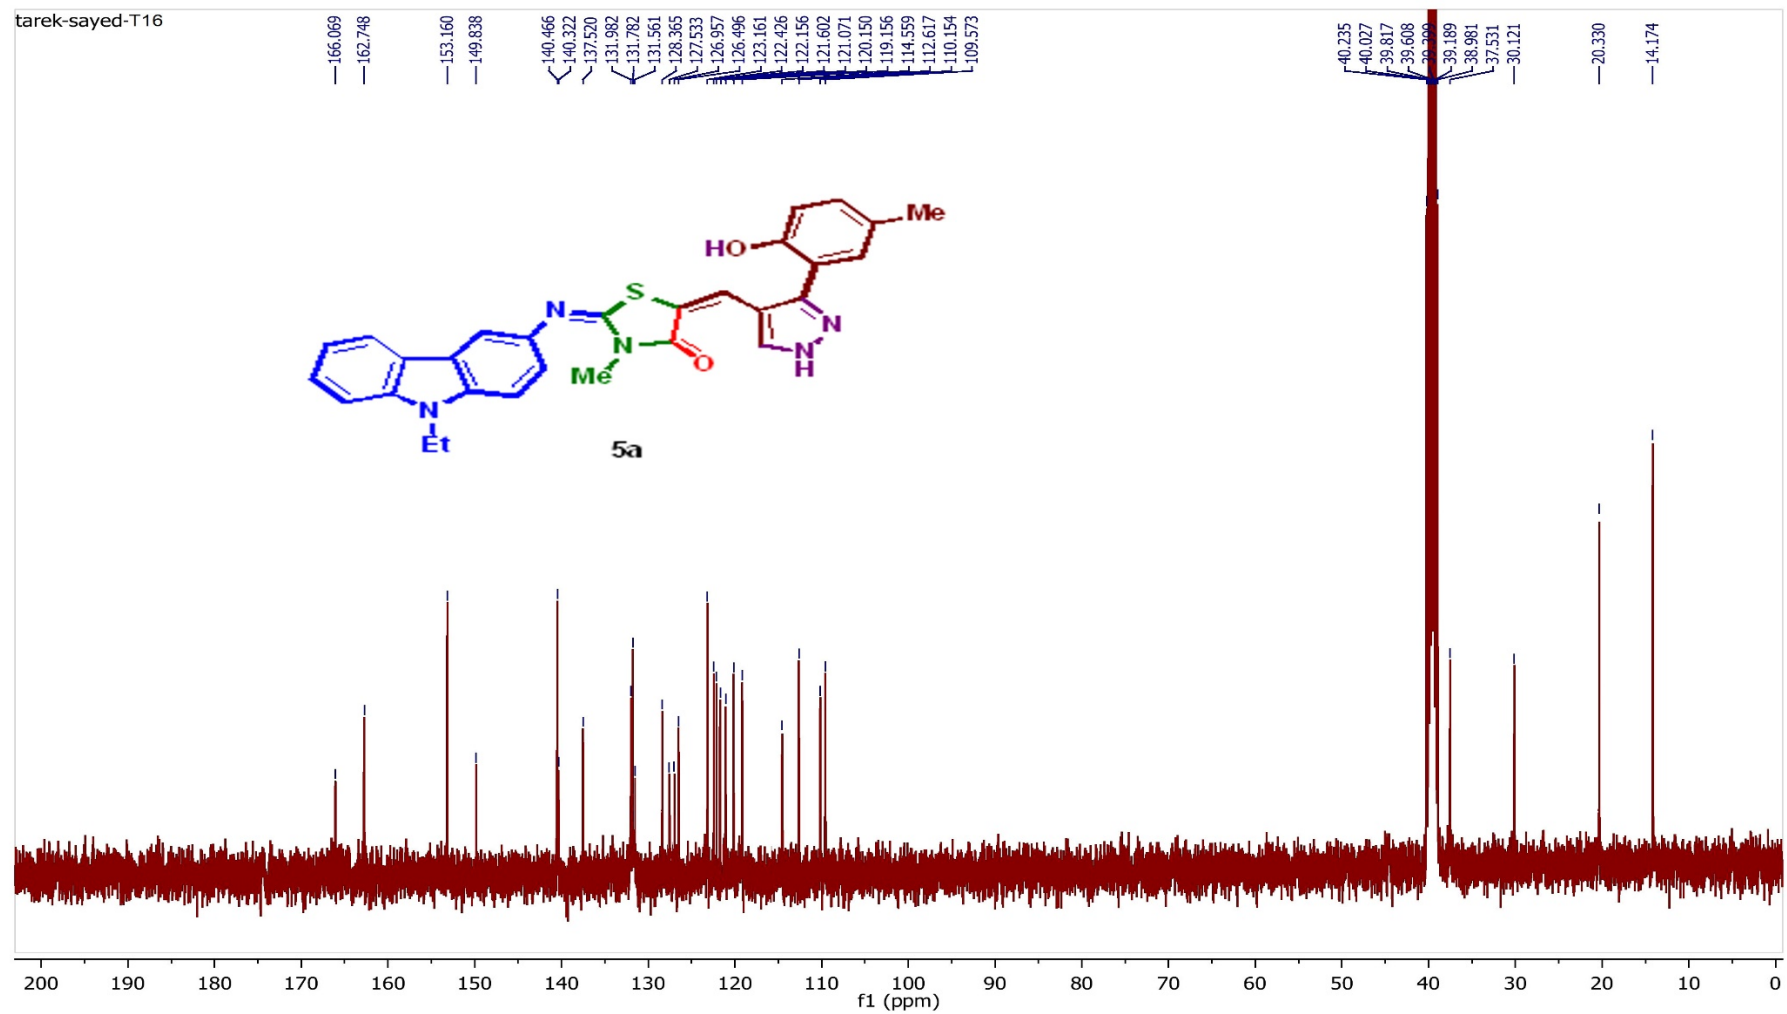

**Figure S45:** The  $^{13}\text{C}$ -NMR spectrum of compound **5a**.

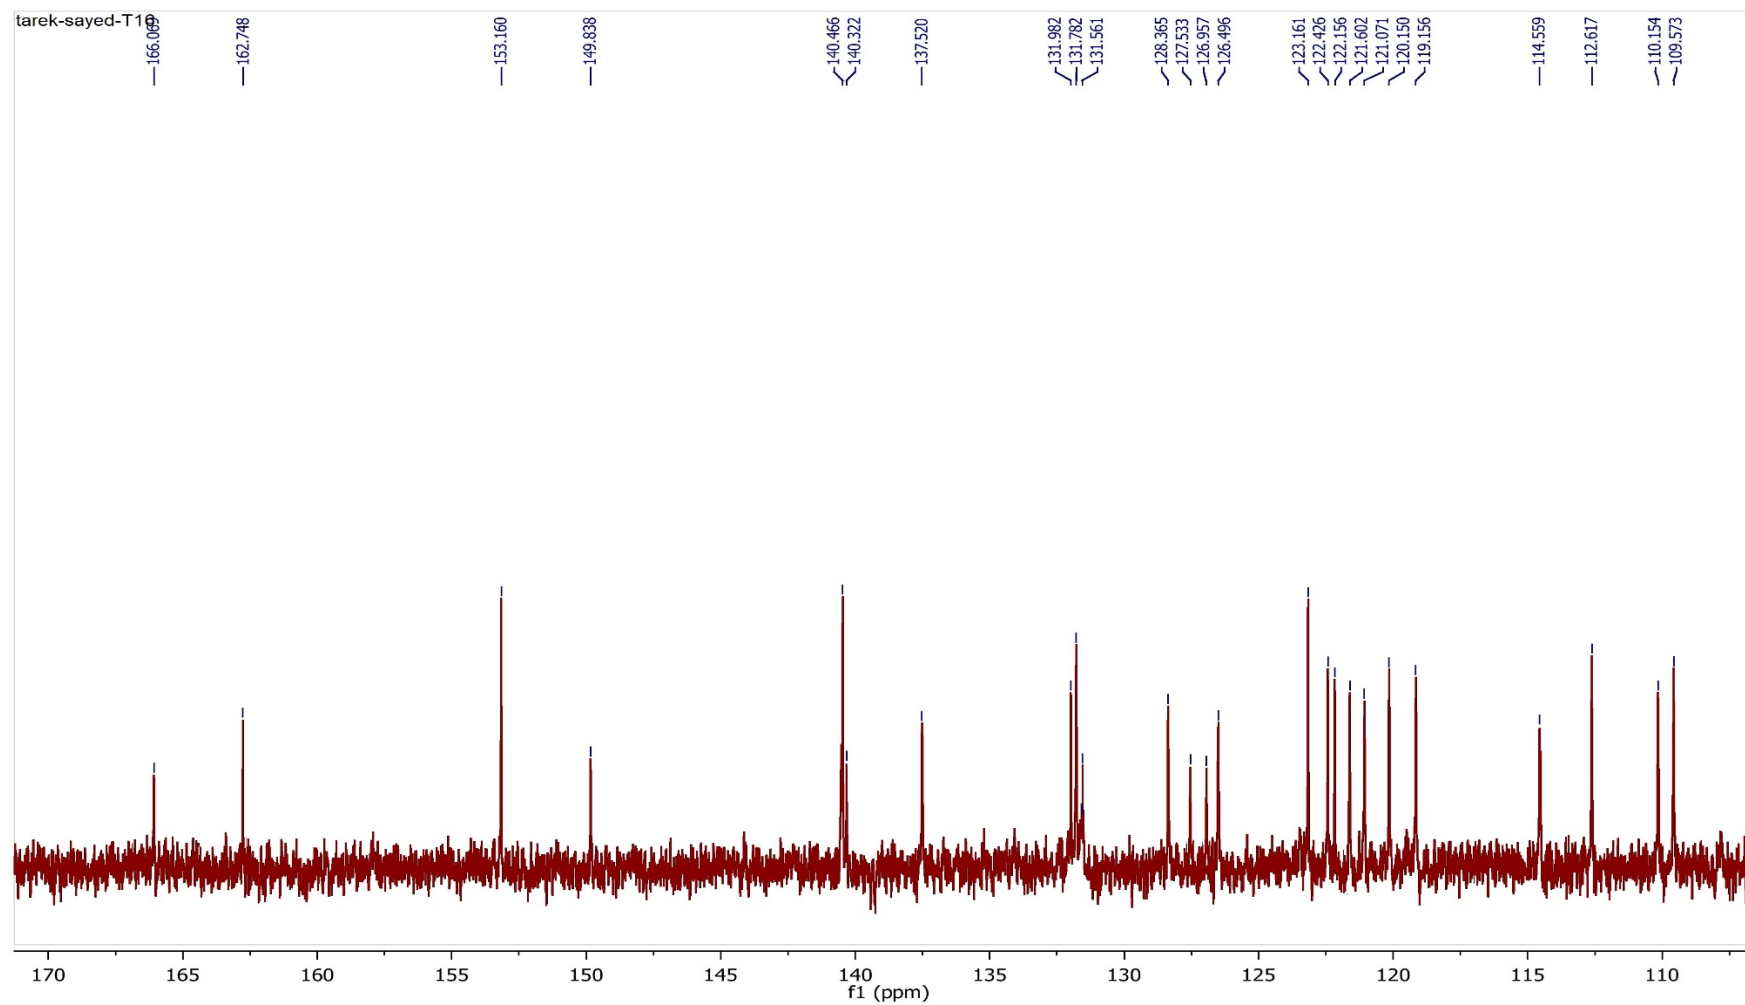

**Figure S46:** The enlargement of downfield region in  $^{13}\text{C}$ -NMR spectrum of compound **5a**.

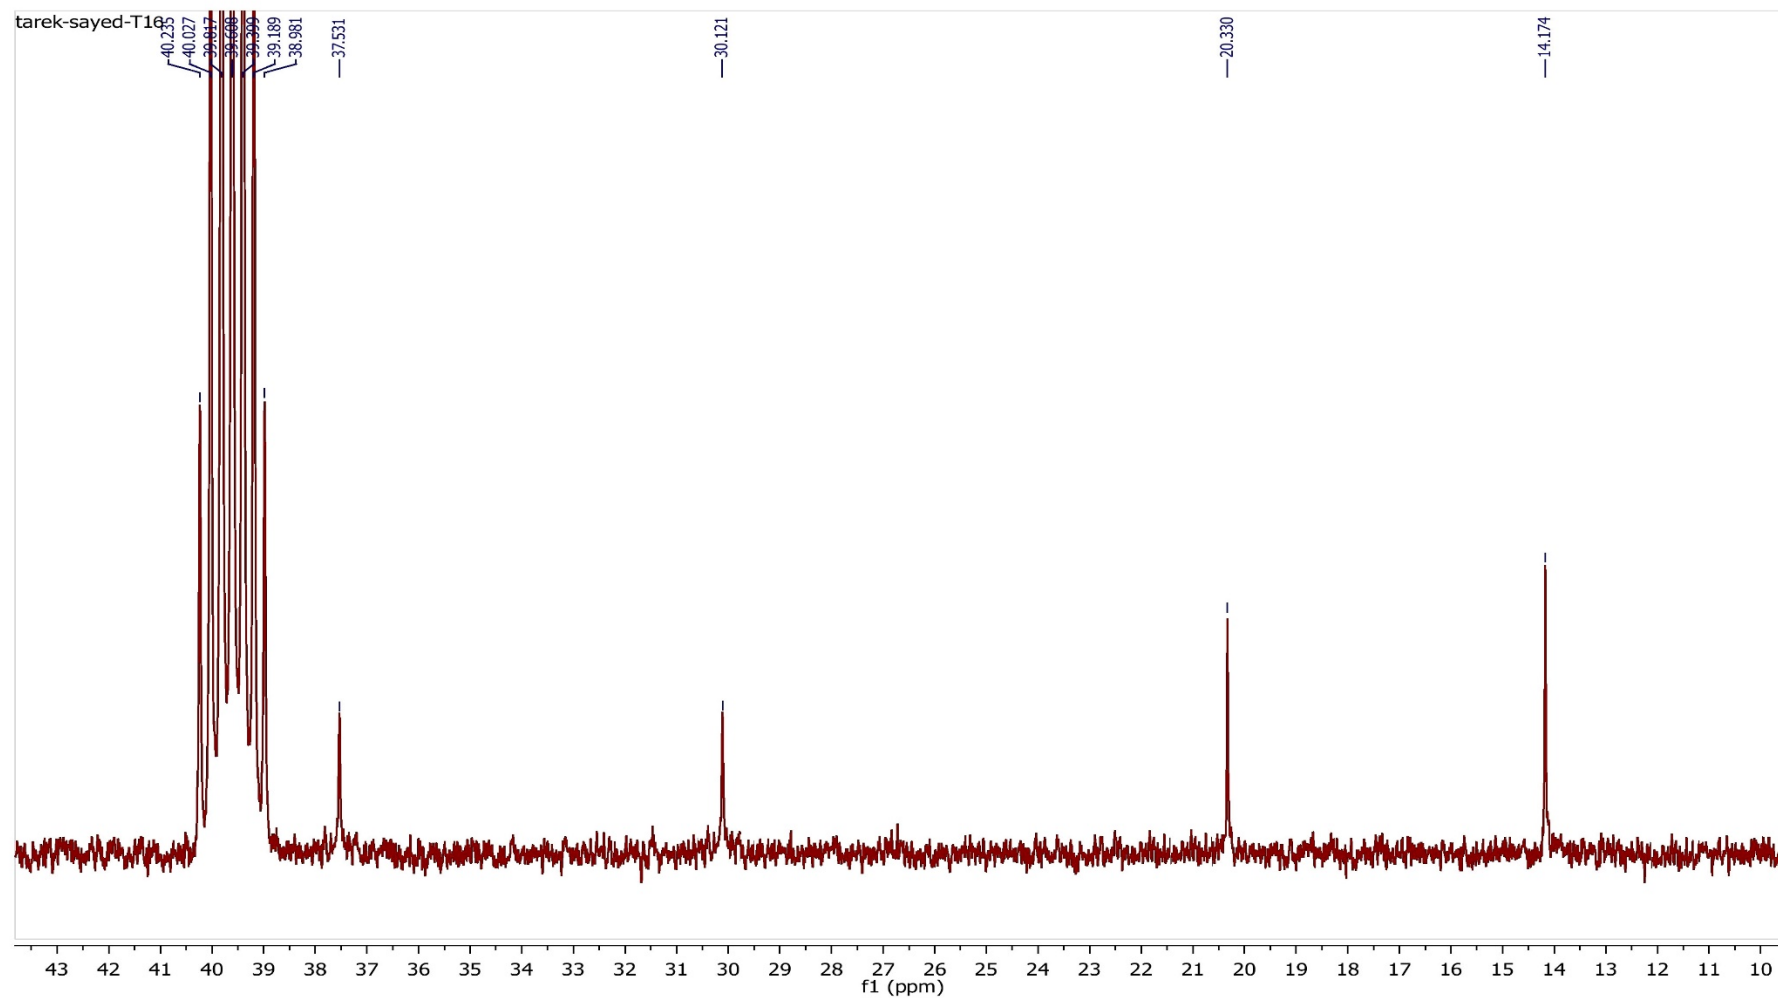

**Figure S47:** The enlargement of upfield region in  $^{13}\text{C}$ -NMR spectrum of compound **5a**.

Chemical structure of compound **5a** is shown. It consists of a 2-ethyl-1H-indole-3-yl group connected to a 4-methyl-5-(2-hydroxy-4-methylphenyl)-1,3,4-thiazolidine-2-thione moiety.

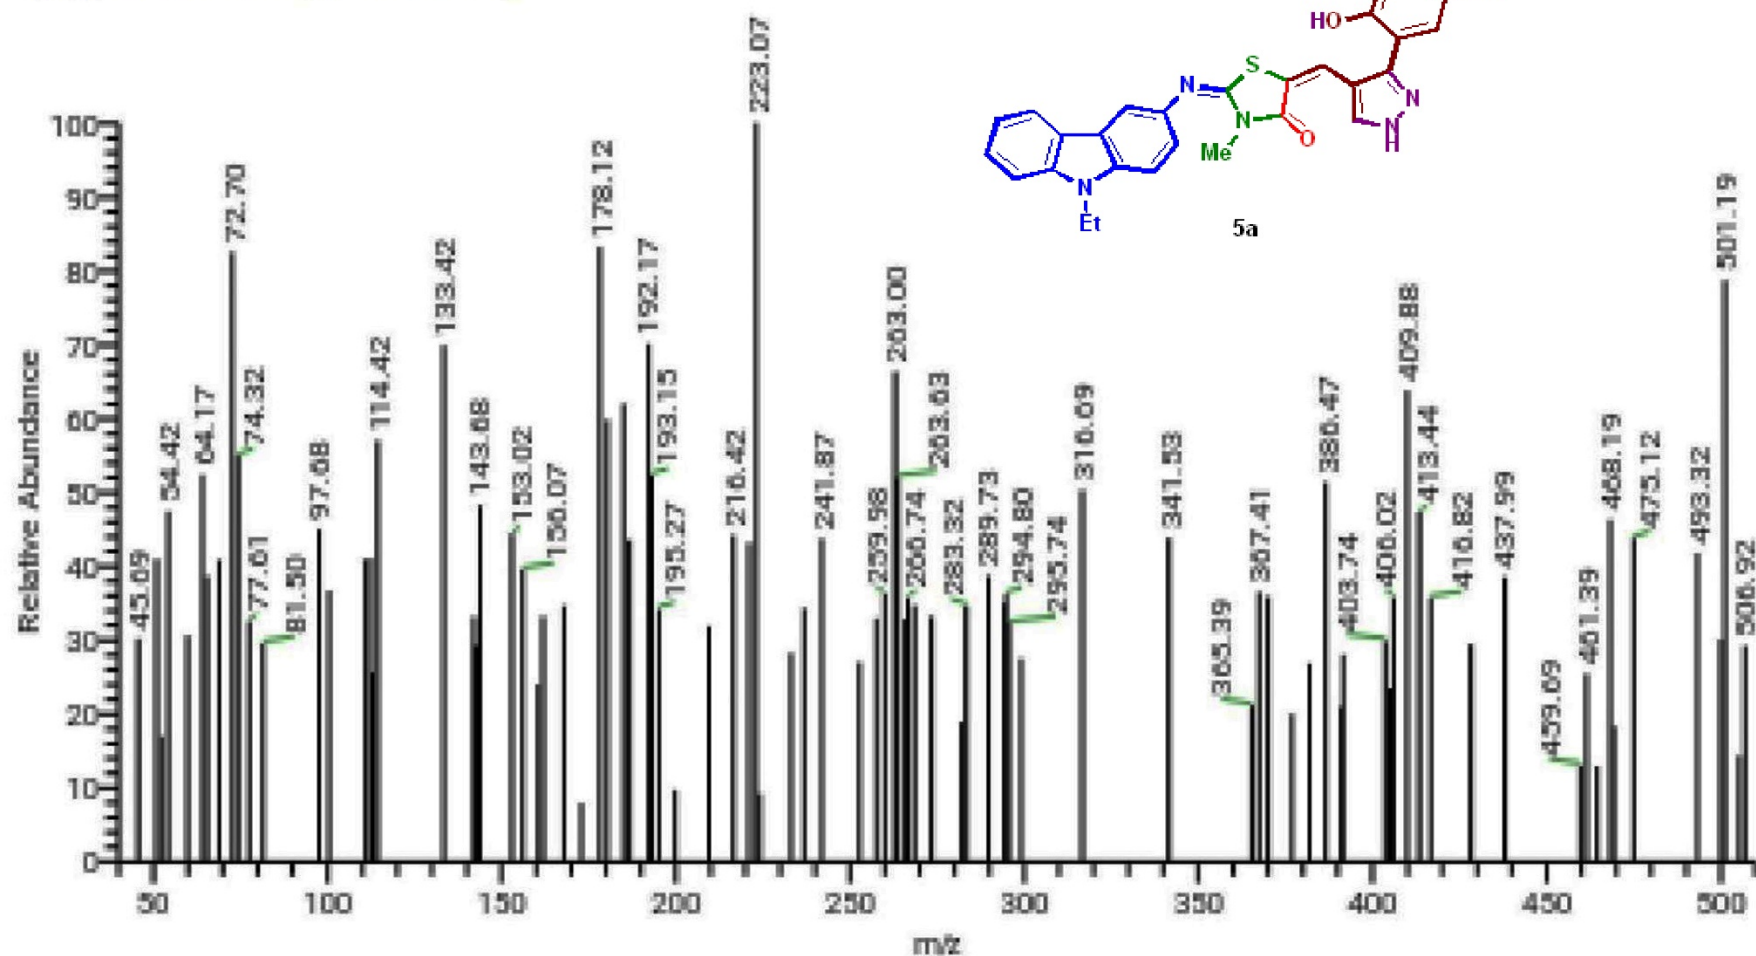

**Figure S48:** The mass spectrum of compound **5a**.

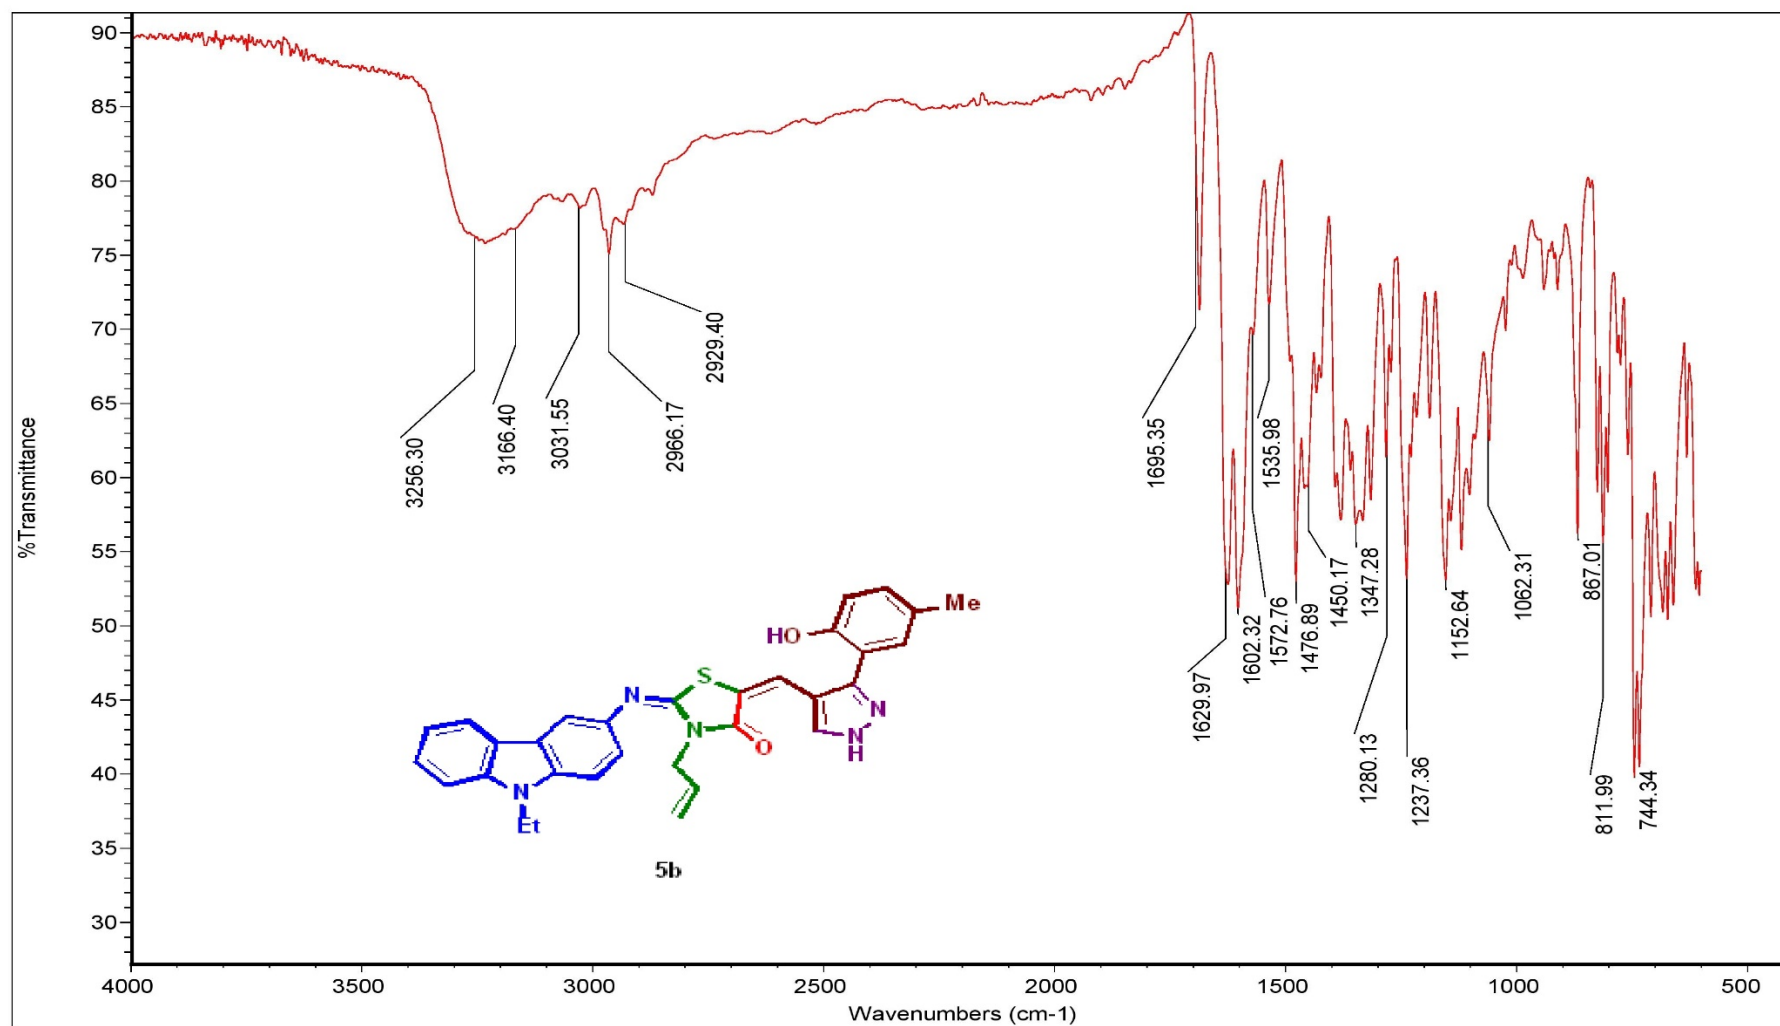

**Figure S49:** The IR spectrum of compound **5b**.

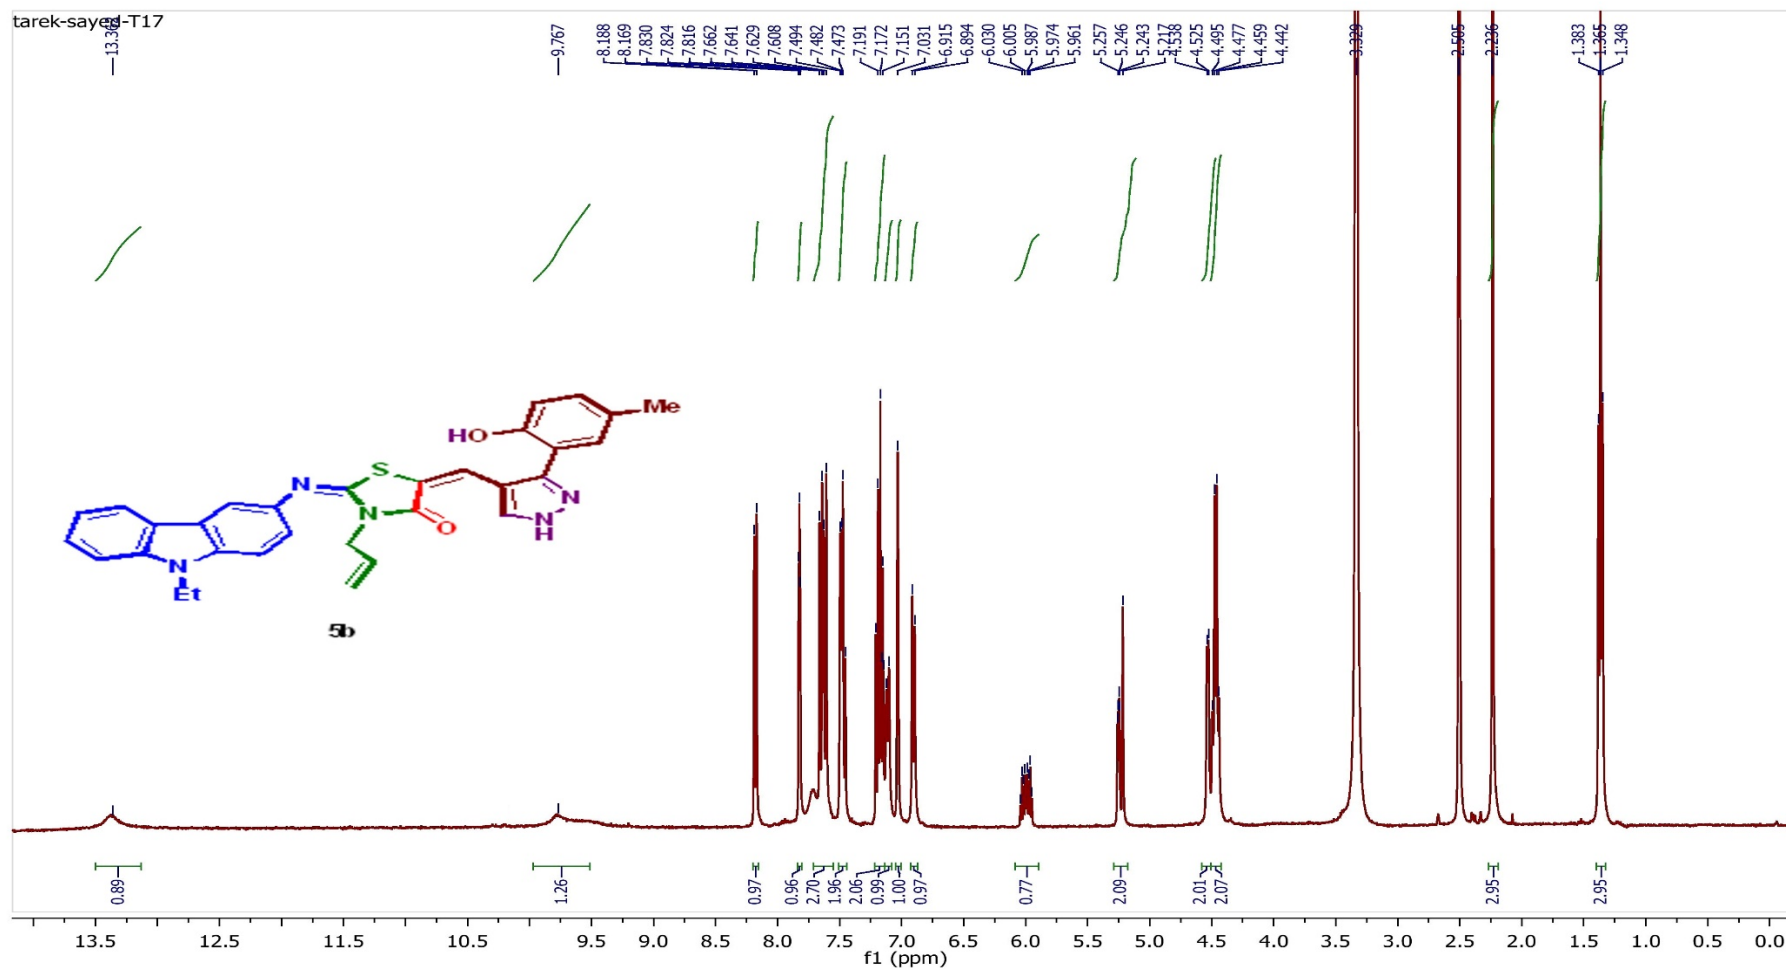

Figure S50: The  $^1\text{H}$ -NMR spectrum of compound **5b**.

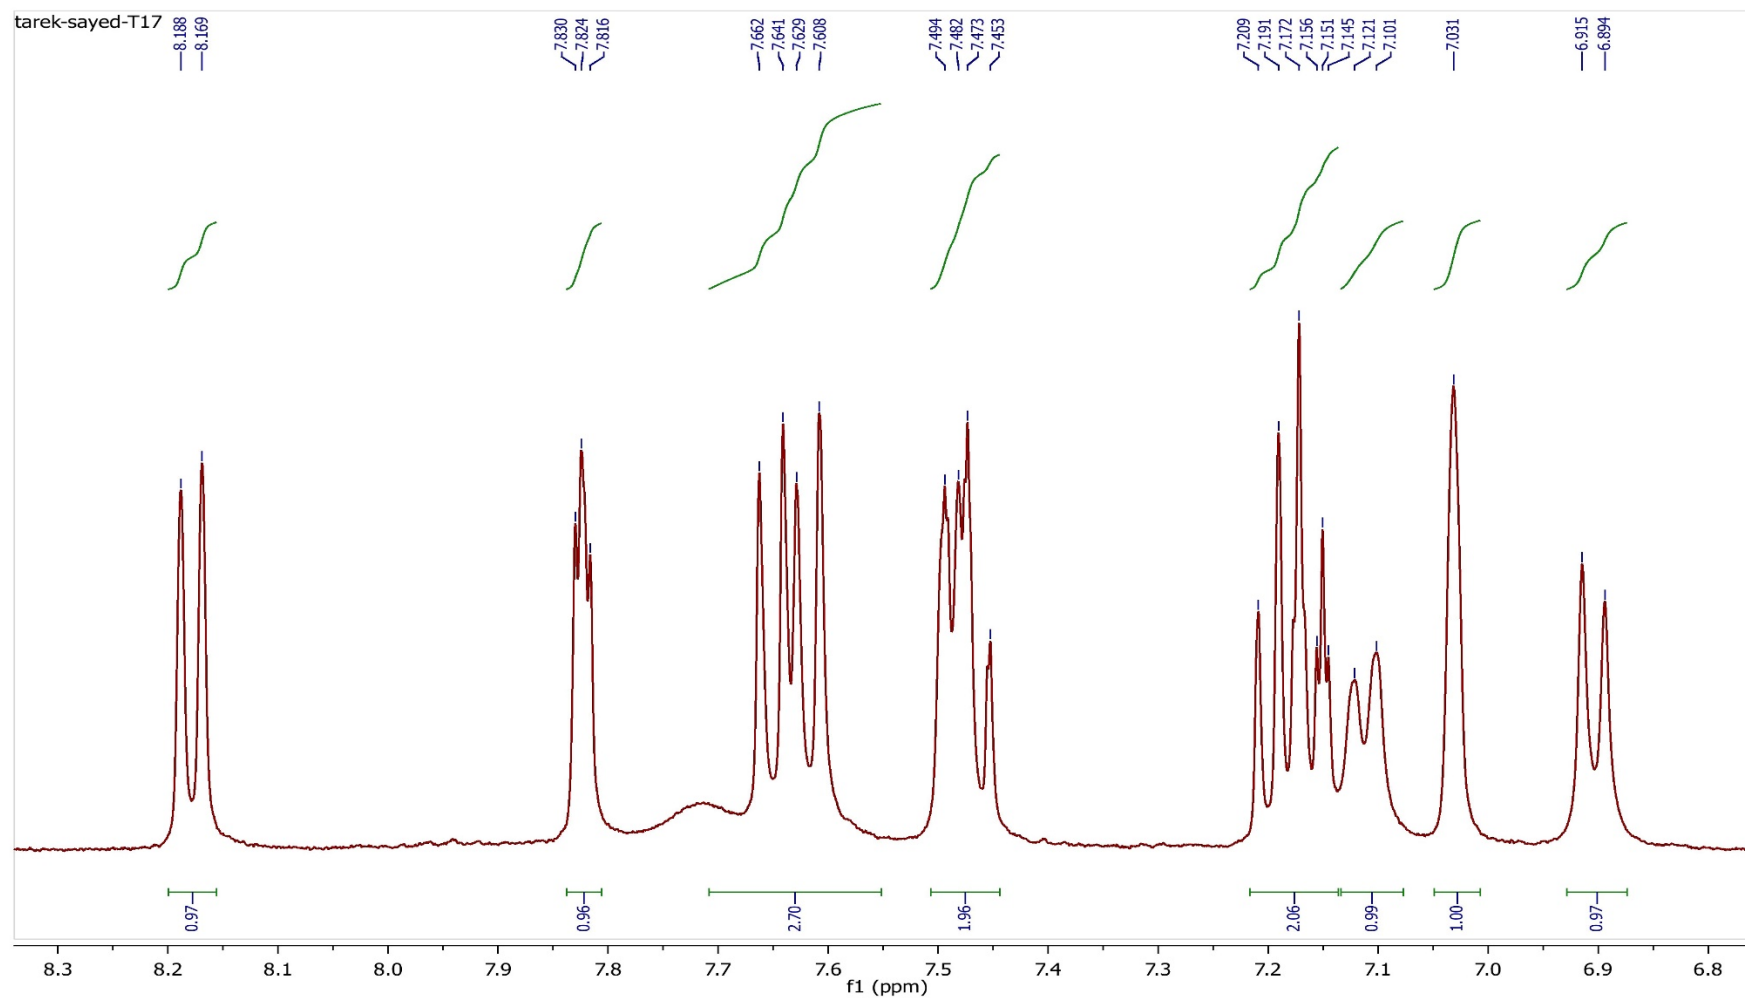

**Figure S51:** The enlargement of downfield region in <sup>1</sup>H-NMR spectrum of compound **5b**.



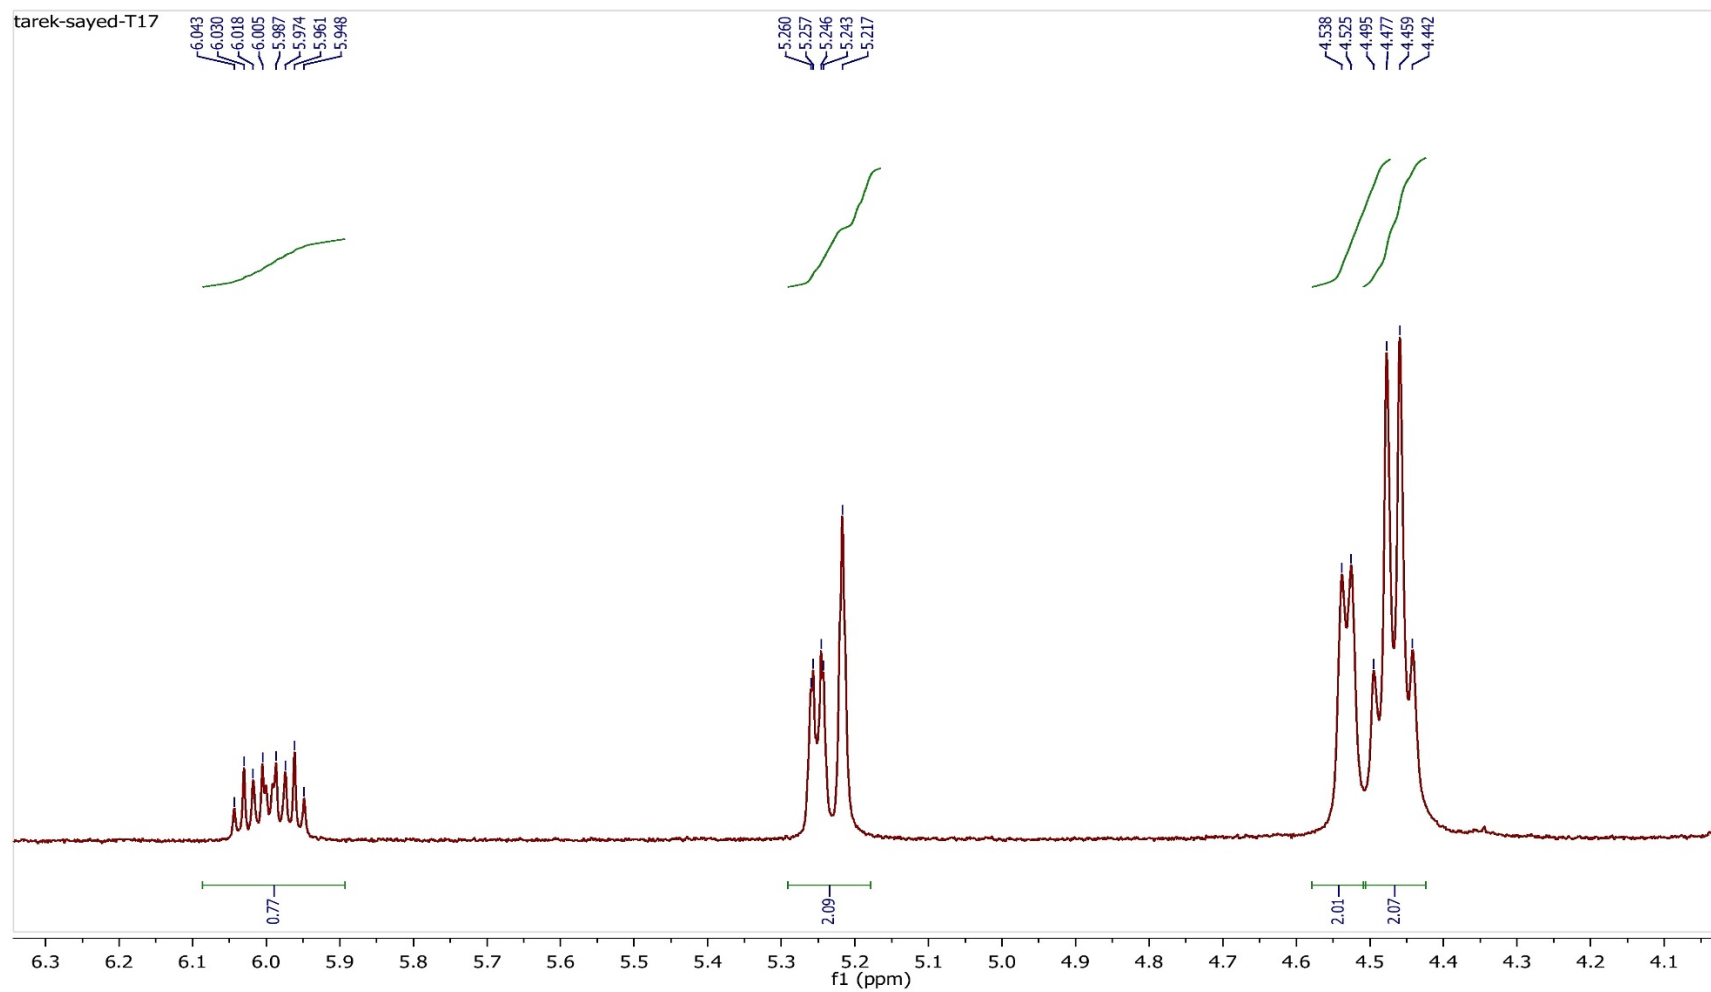

**Figure S52:** The enlargement of upfield region in  $^1\text{H}$ -NMR spectrum of compound **5b**.

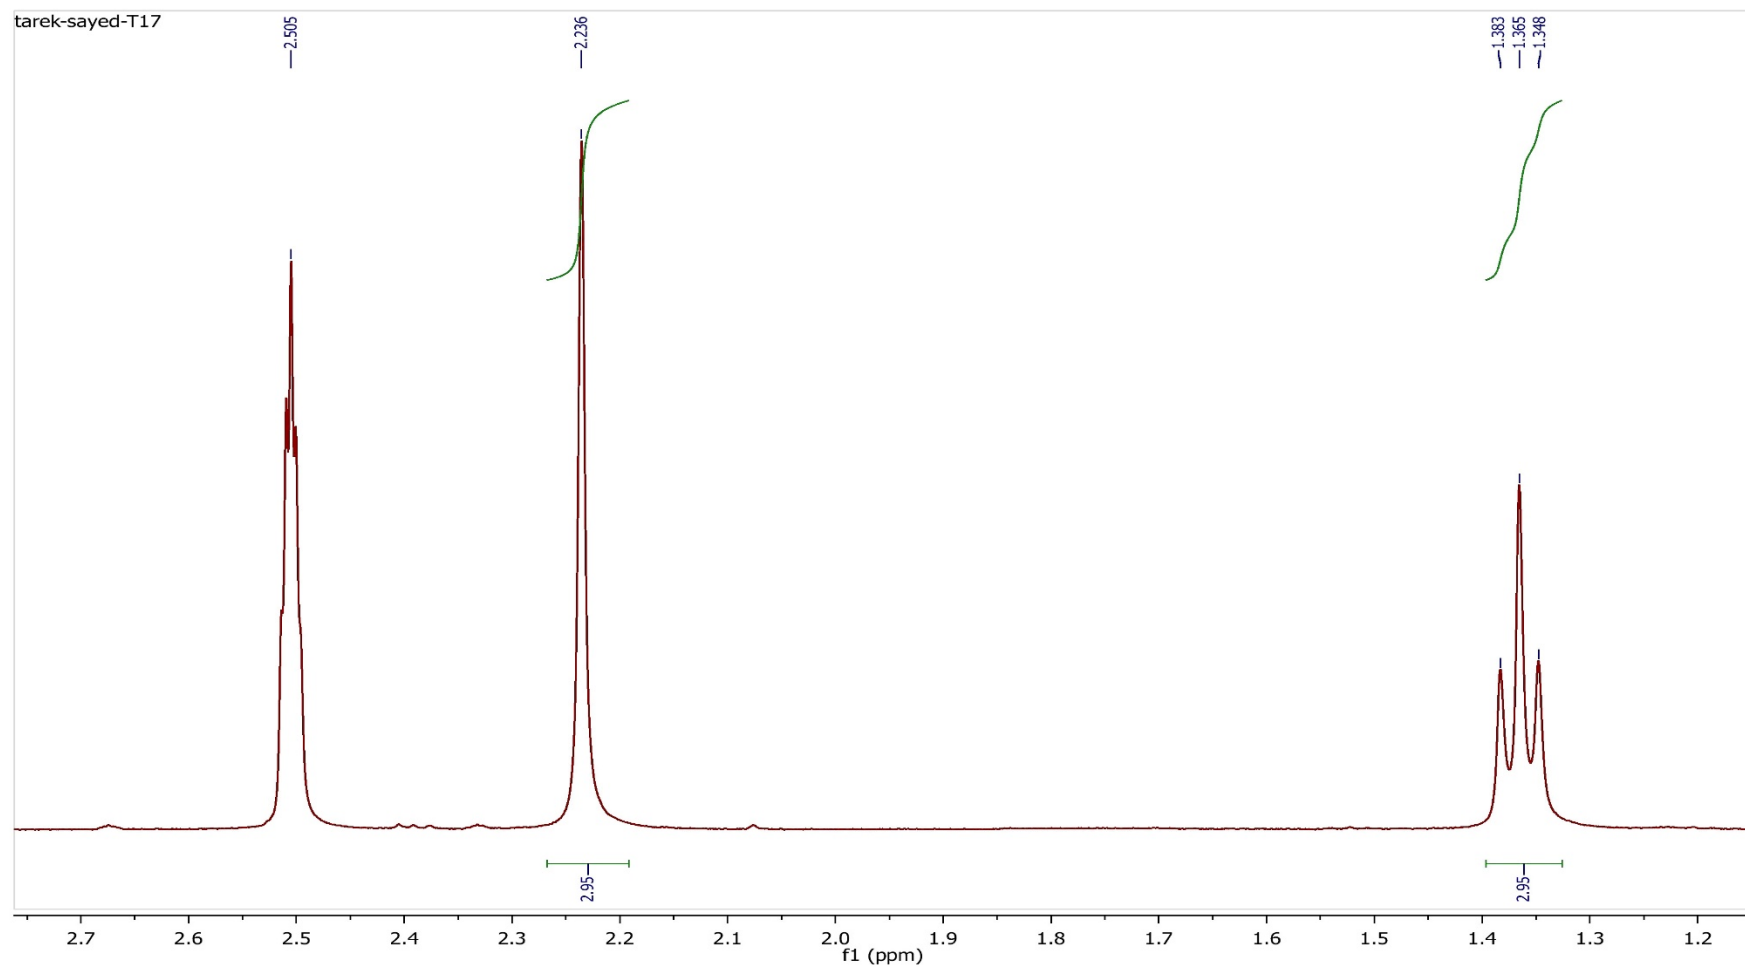

**Figure S53:** The enlargement of upfield region in  $^1\text{H}$ -NMR spectrum of compound **5b**.

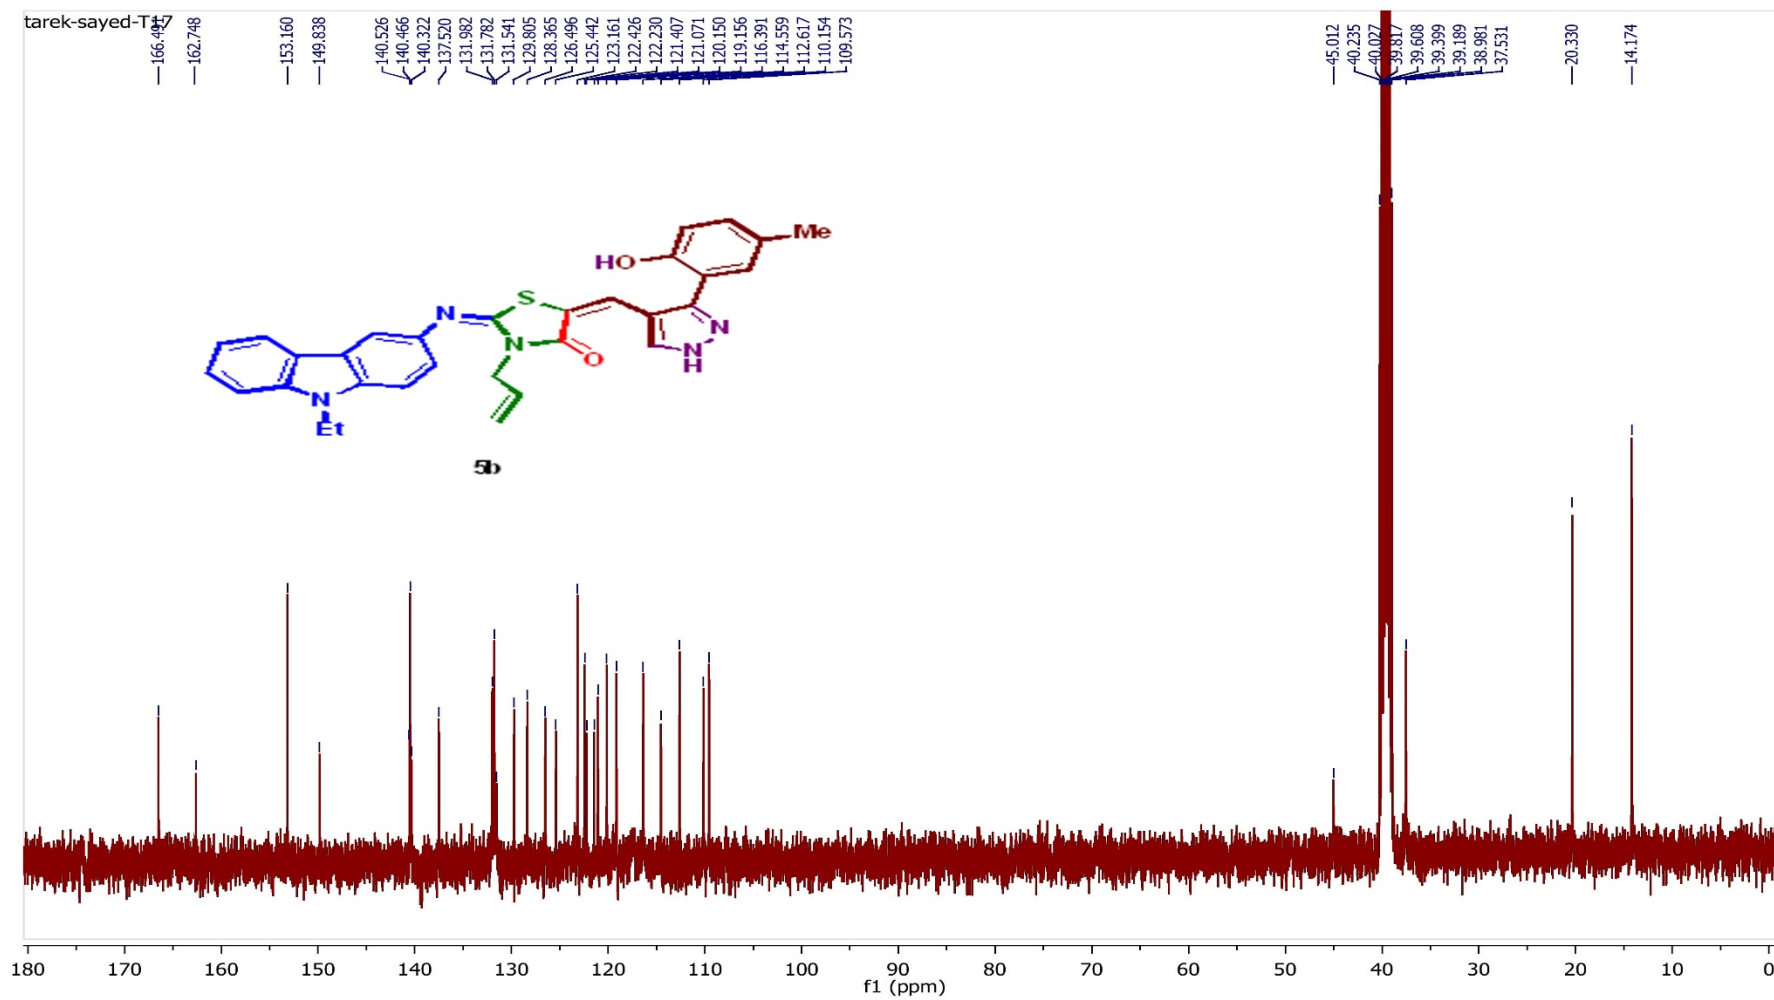

**Figure S54:** The  $^{13}\text{C}$ -NMR spectrum of compound **5b**.

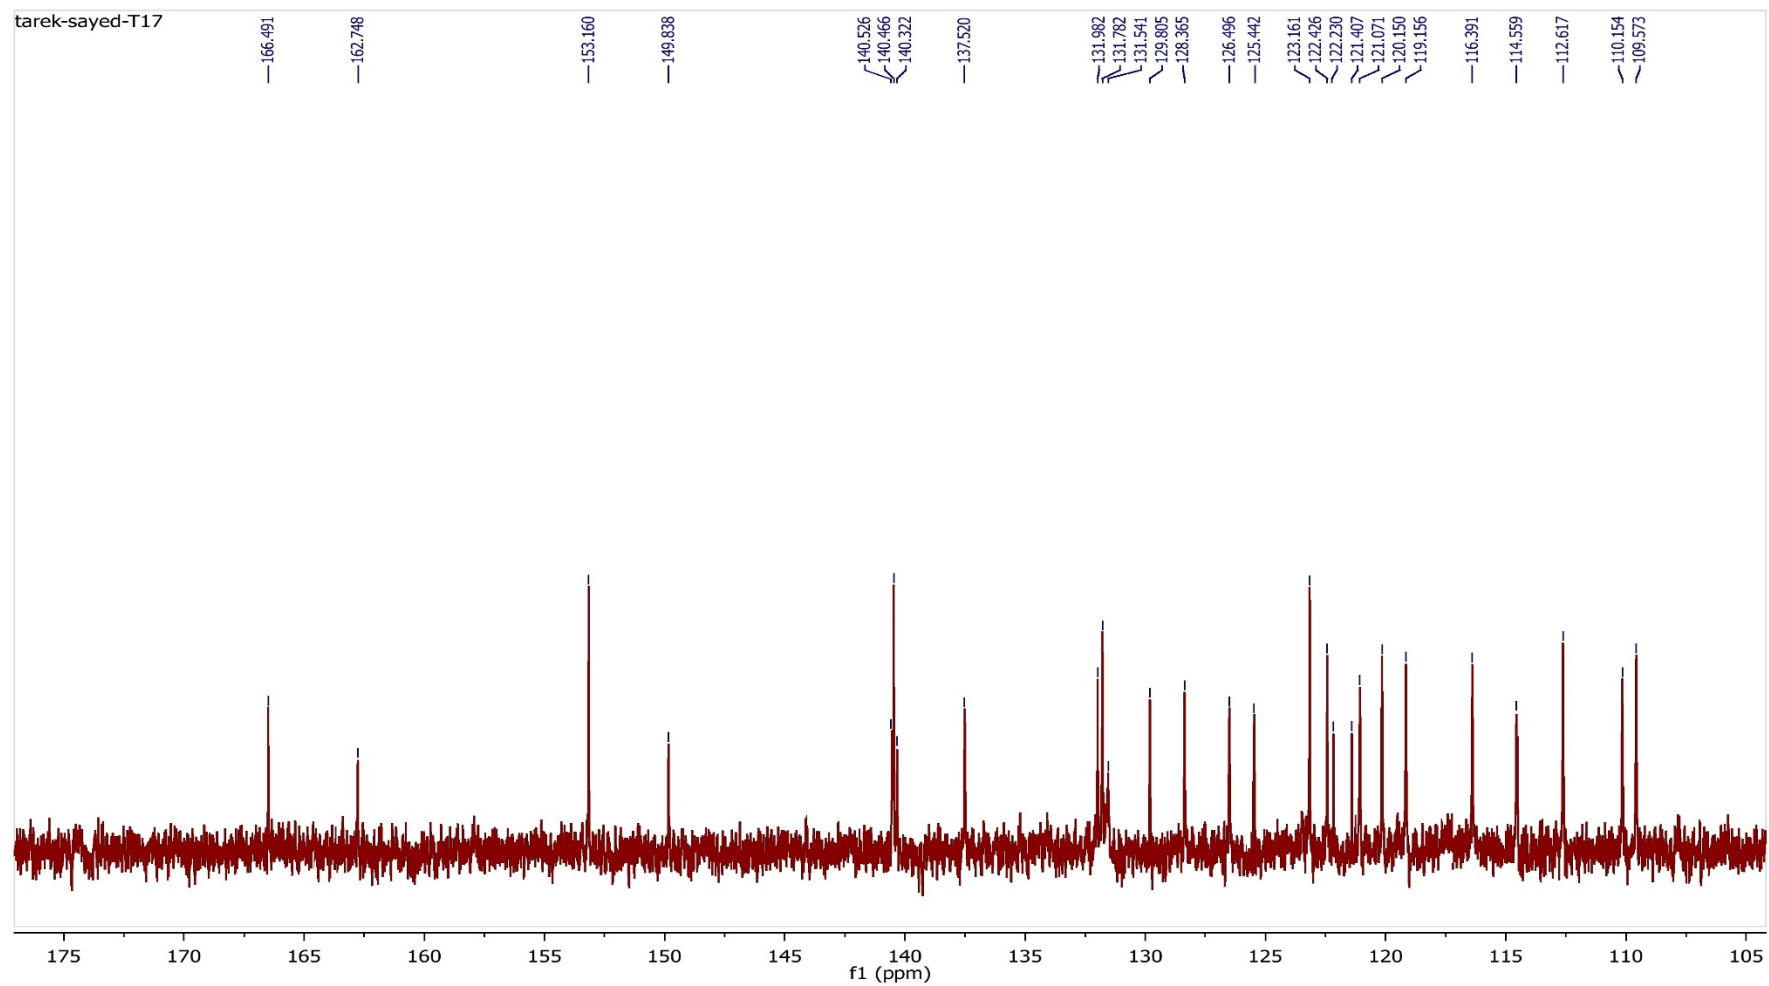

**Figure S55:** The enlargement of downfield region in  $^{13}\text{C}$ -NMR spectrum of compound **5b**.

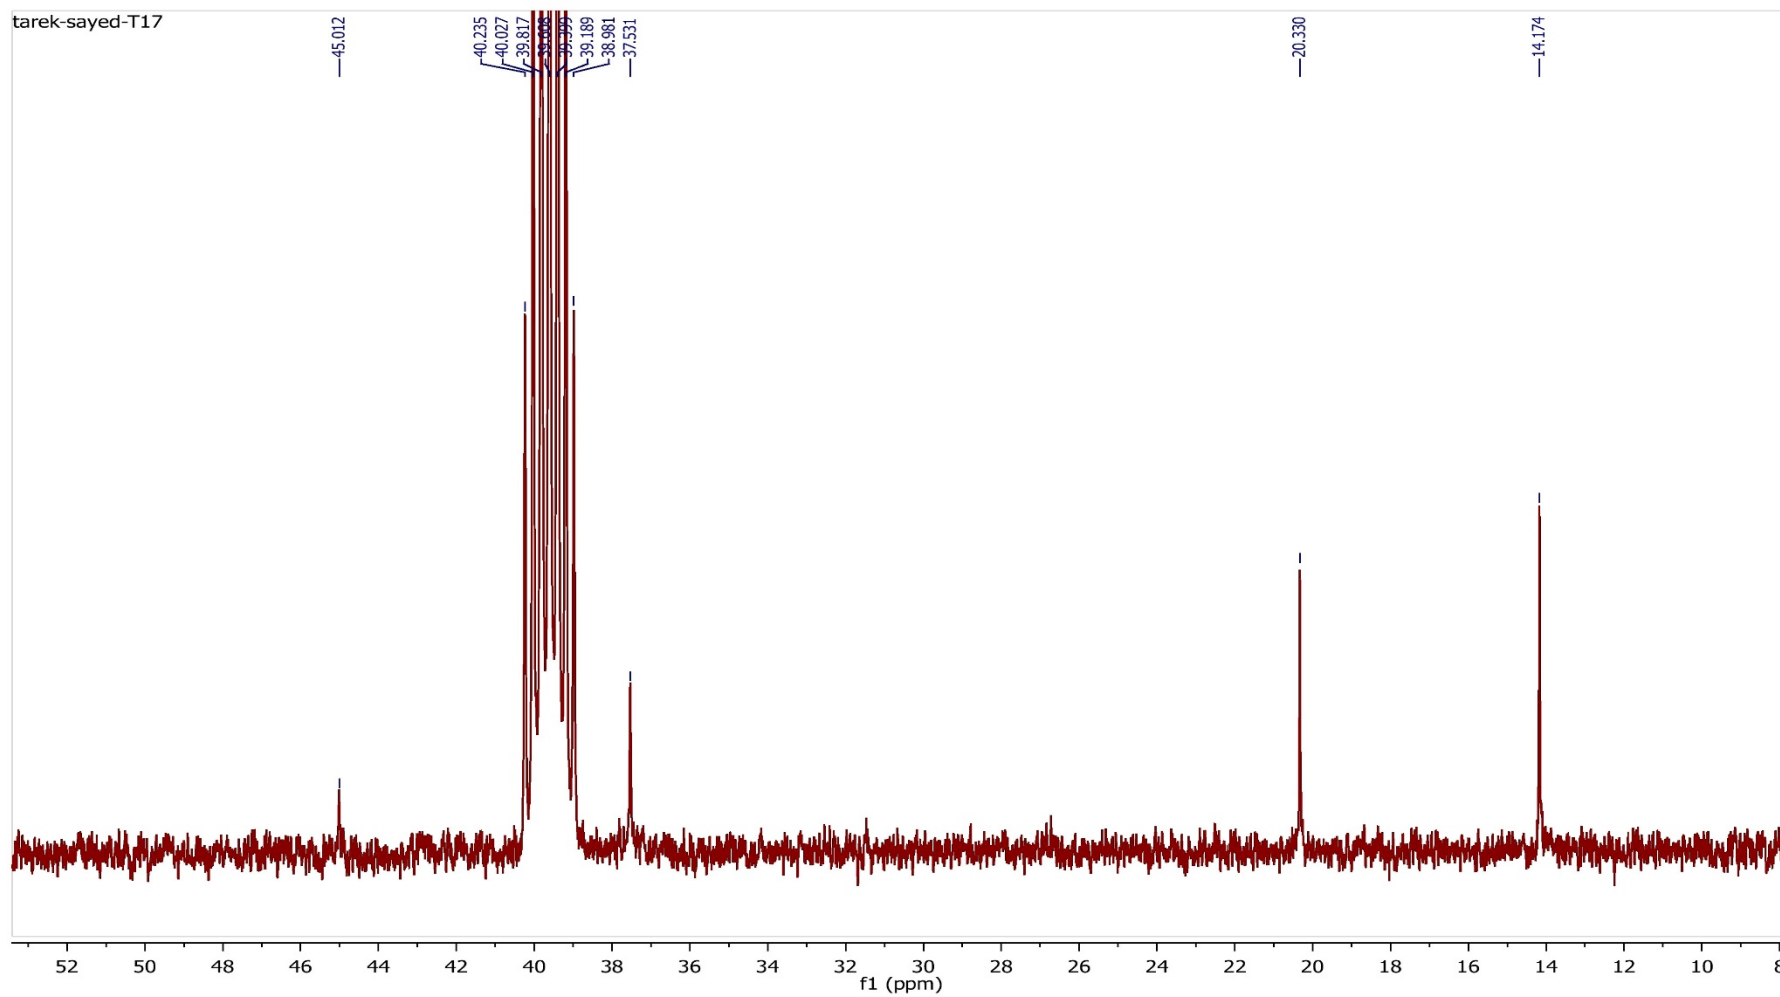

**Figure S56:** The enlargement of upfield region in  $^{13}\text{C}$ -NMR spectrum of compound **5b**.

tarek-17 #48-50 RT: 0.82-0.85 AV: 3 SB: 2 3.82, 3.53 NL: 1.57E2  
T: (0,0) +c EI Full ms [40.00-1000.00]

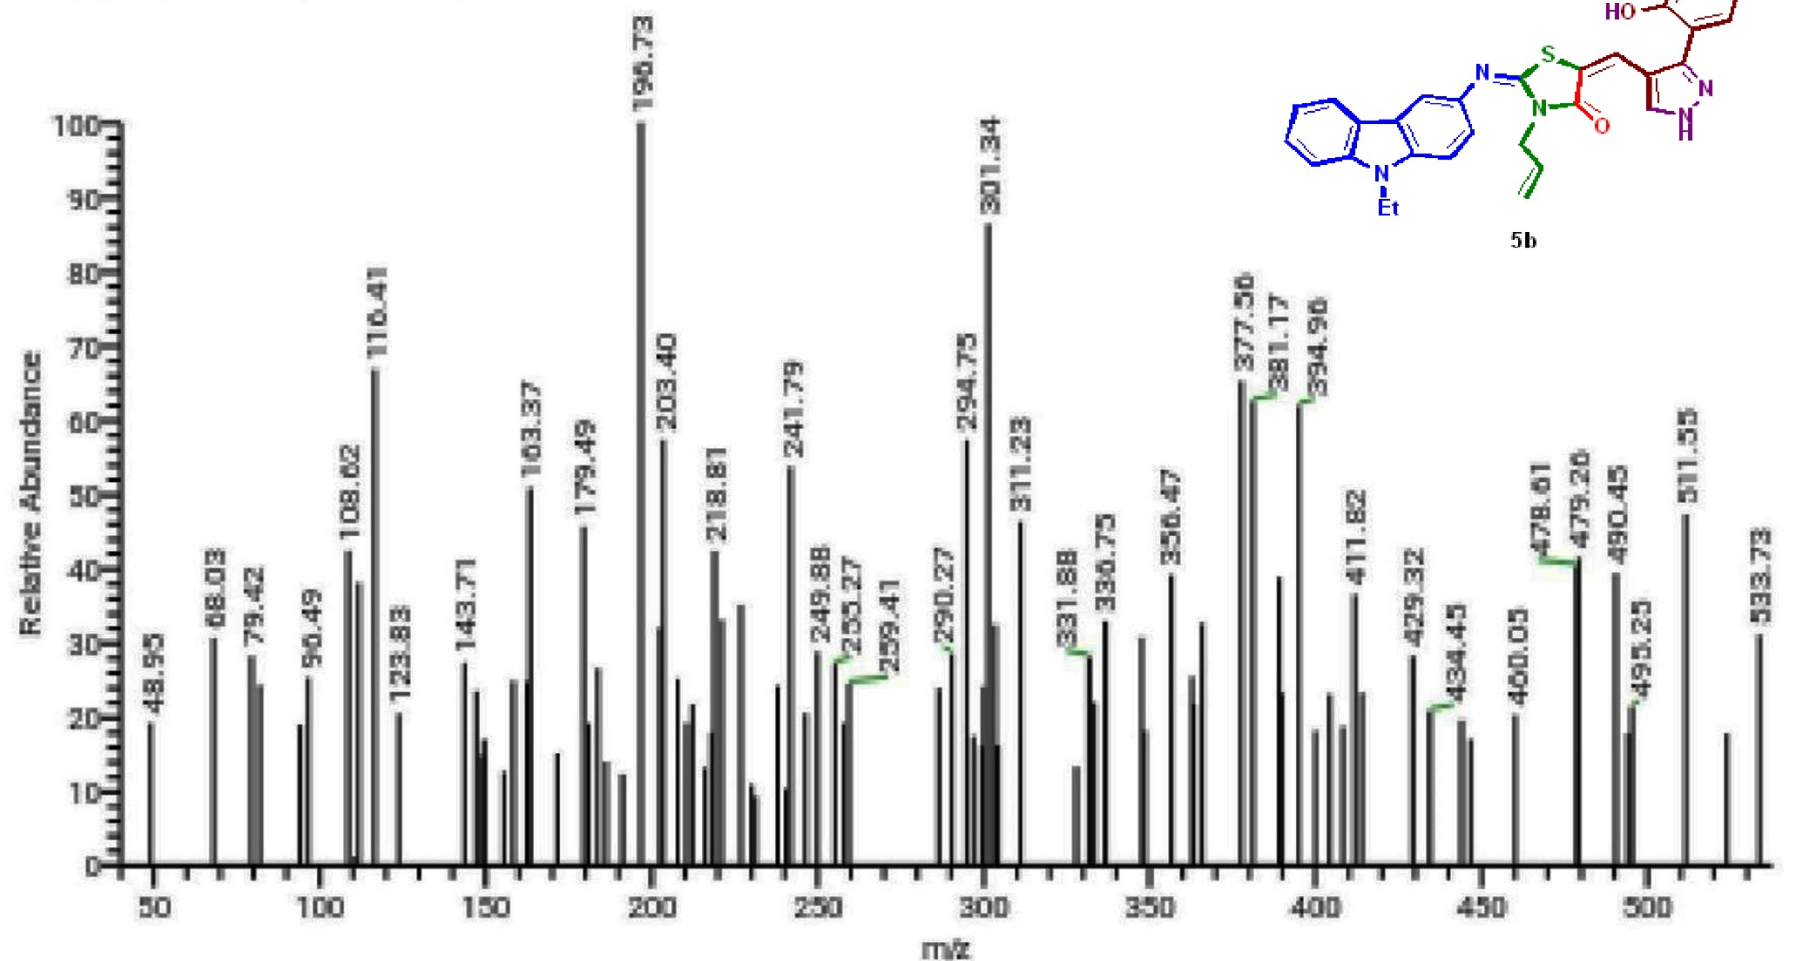

Figure S57: The mass spectrum of compound 5b.

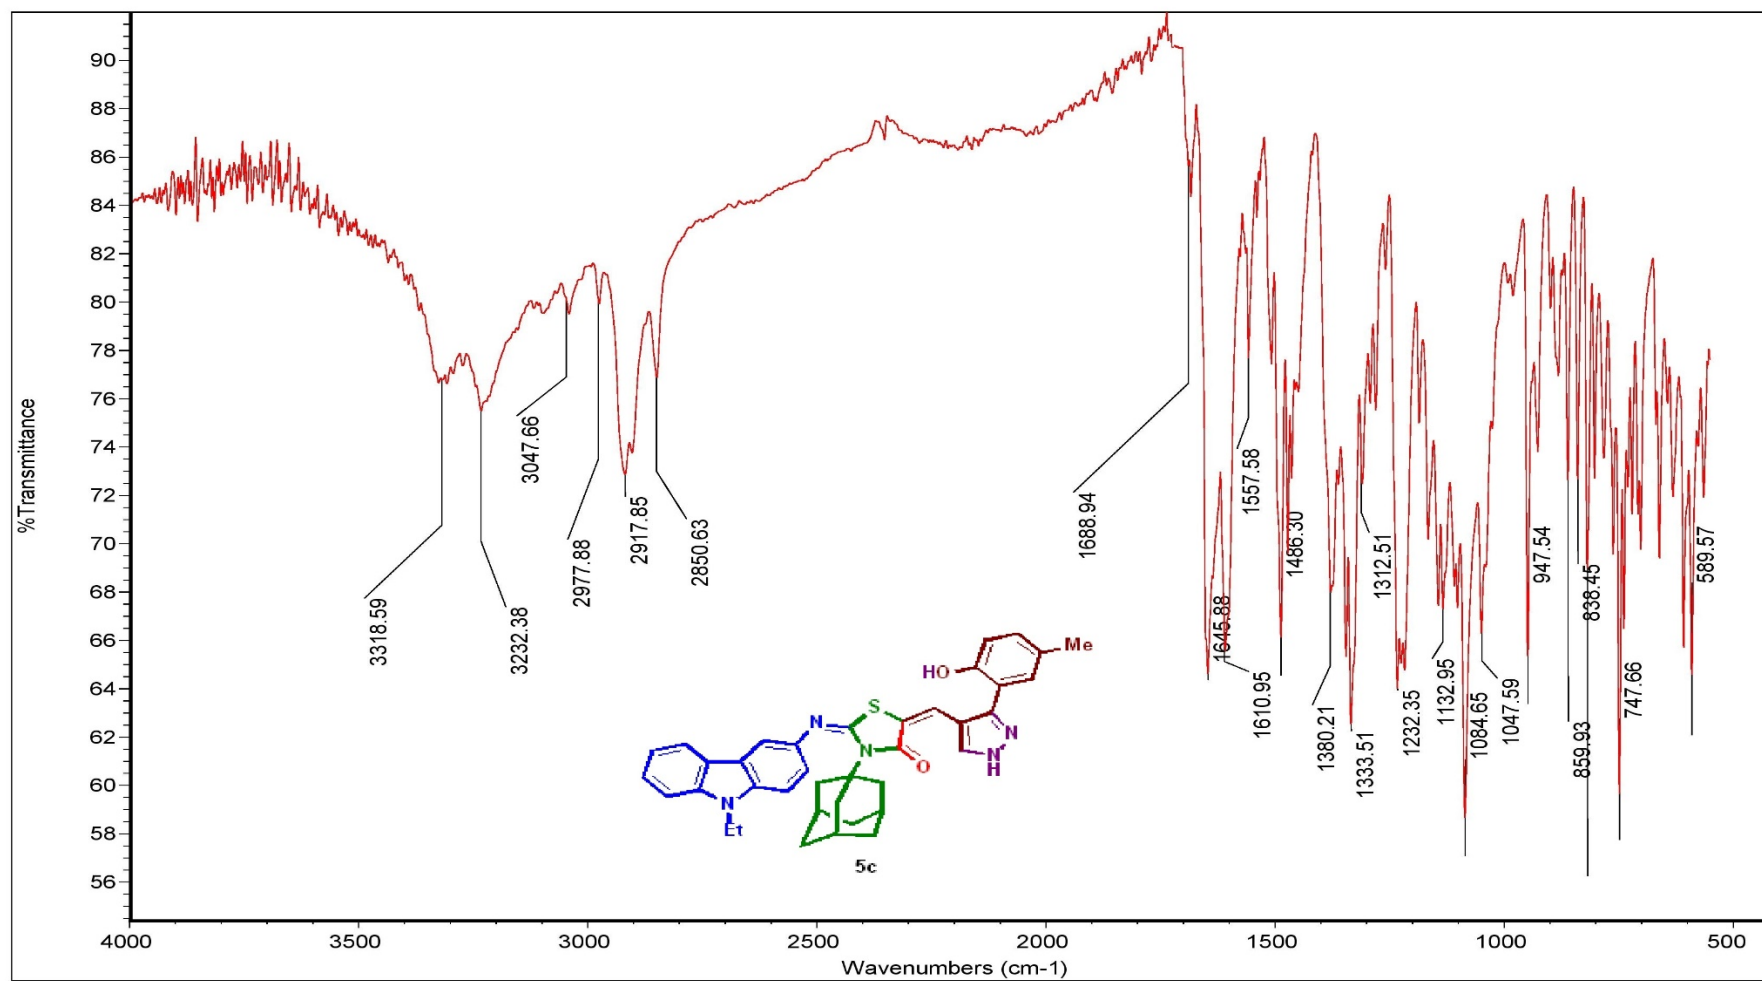

**Figure S58:** The IR spectrum of compound **5c**.

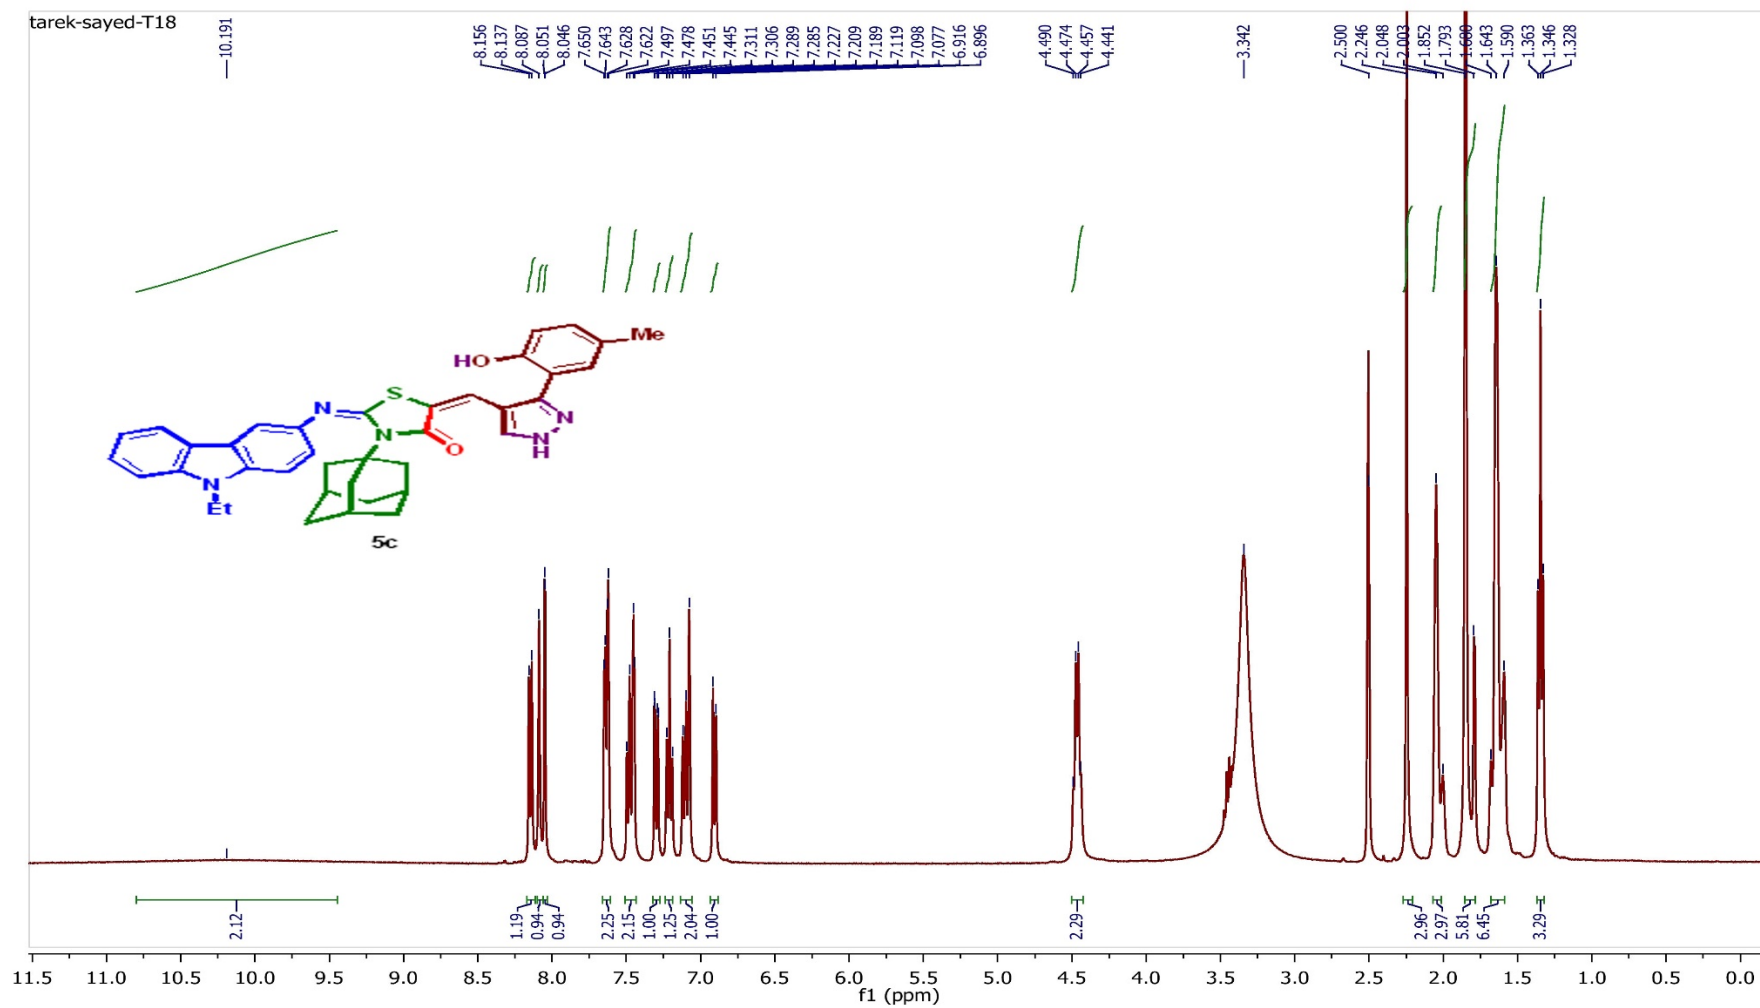

**Figure S59:** The  $^1\text{H}$ -NMR spectrum of compound **5c**.



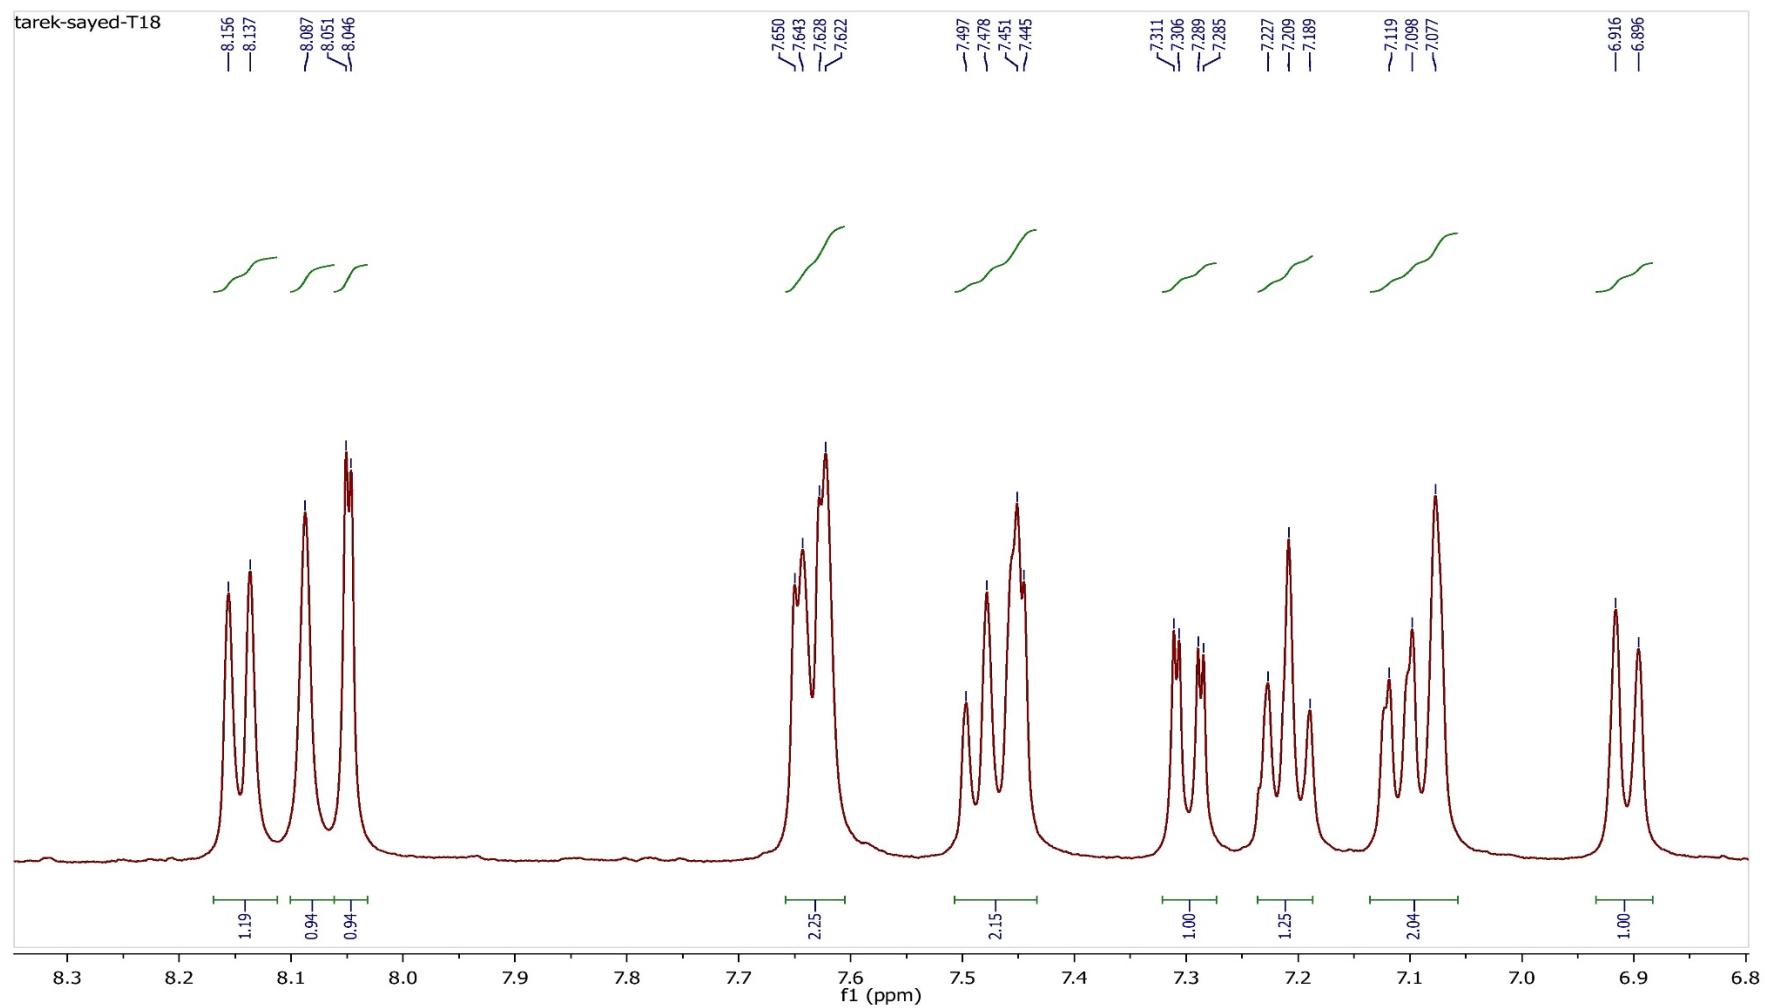

**Figure S60:** The enlargement of downfield region in  $^1\text{H}$ -NMR spectrum of compound **5c**.

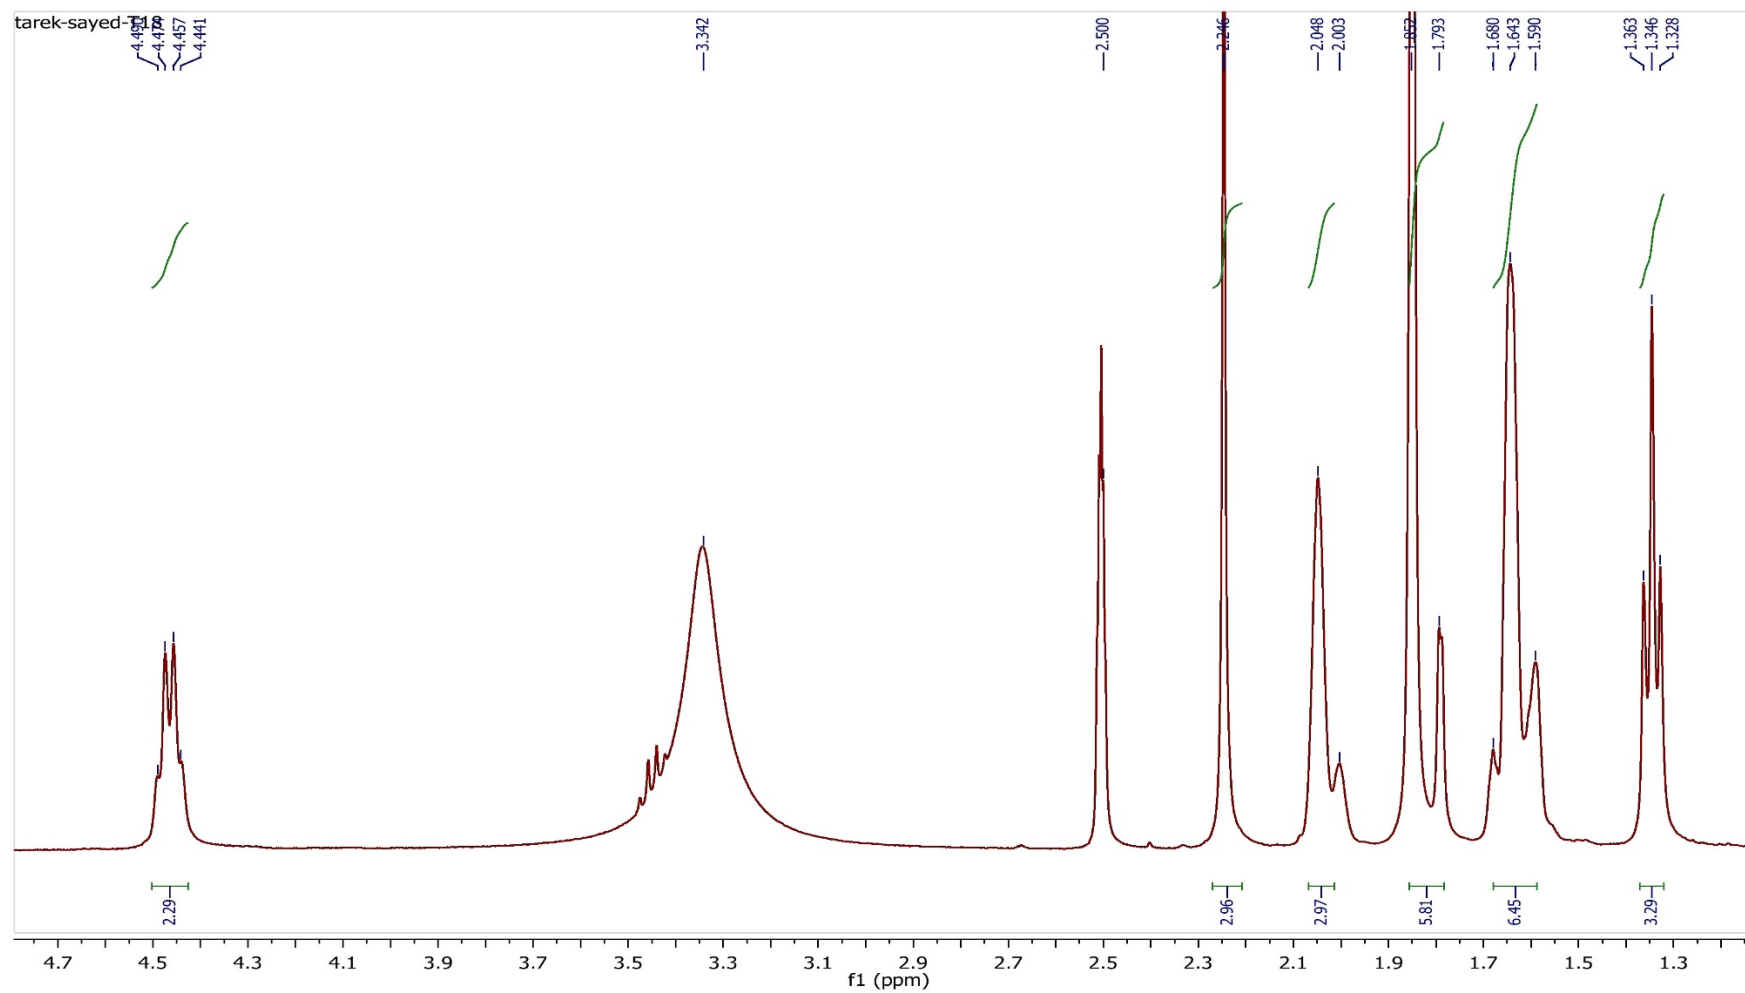

**Figure S61:** The enlargement of upfield region in  $^1\text{H}$ -NMR spectrum of compound **5c**.

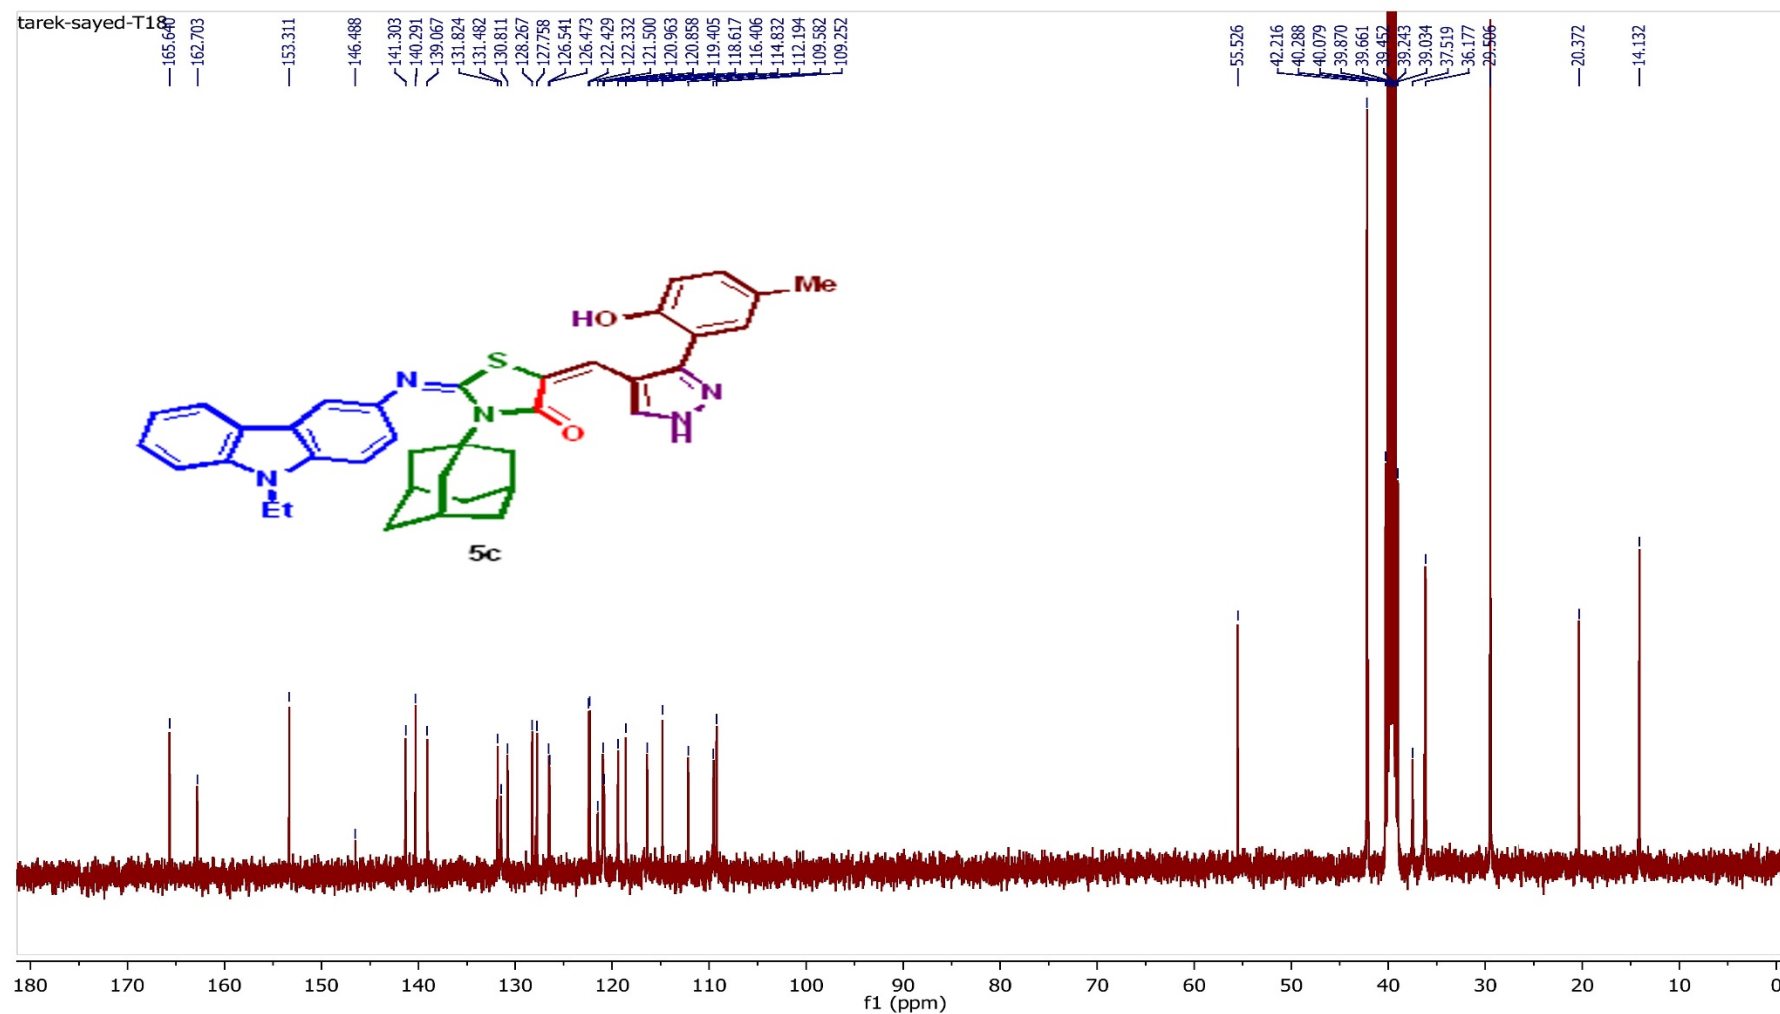

**Figure S62:** The  $^{13}\text{C}$ -NMR spectrum of compound **5c**.

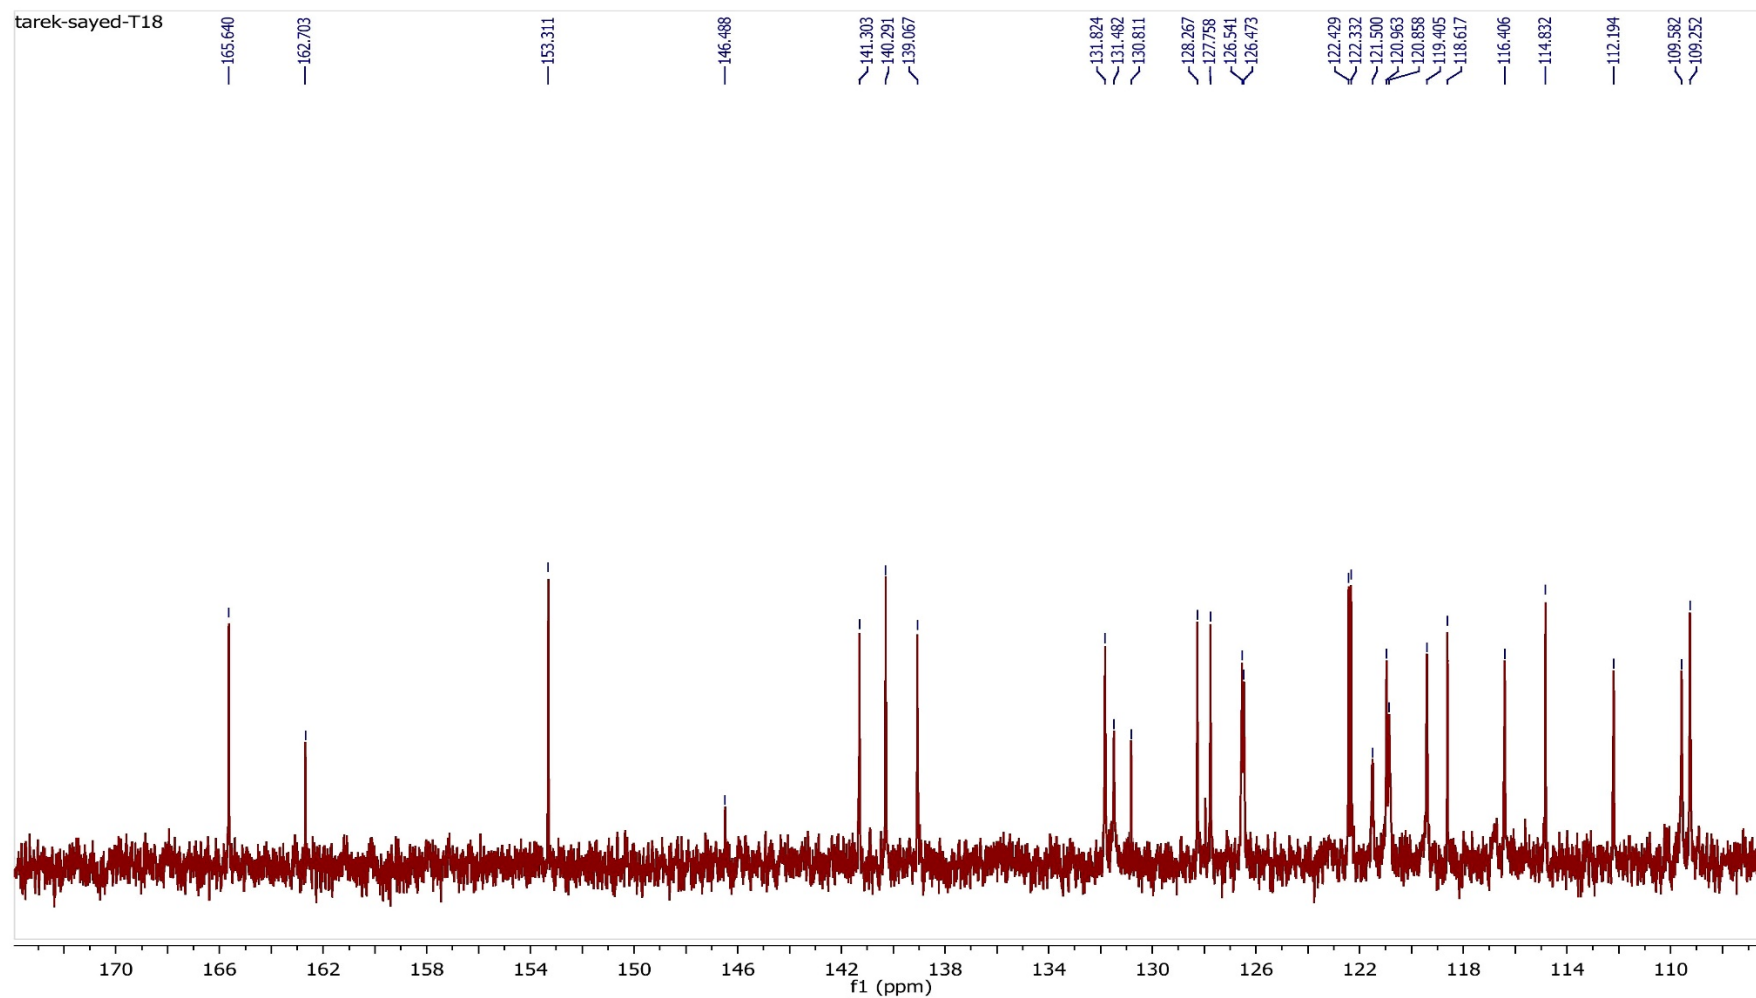

**Figure S63:** The enlargement of downfield region in  $^{13}\text{C}$ -NMR spectrum of compound **5c**.

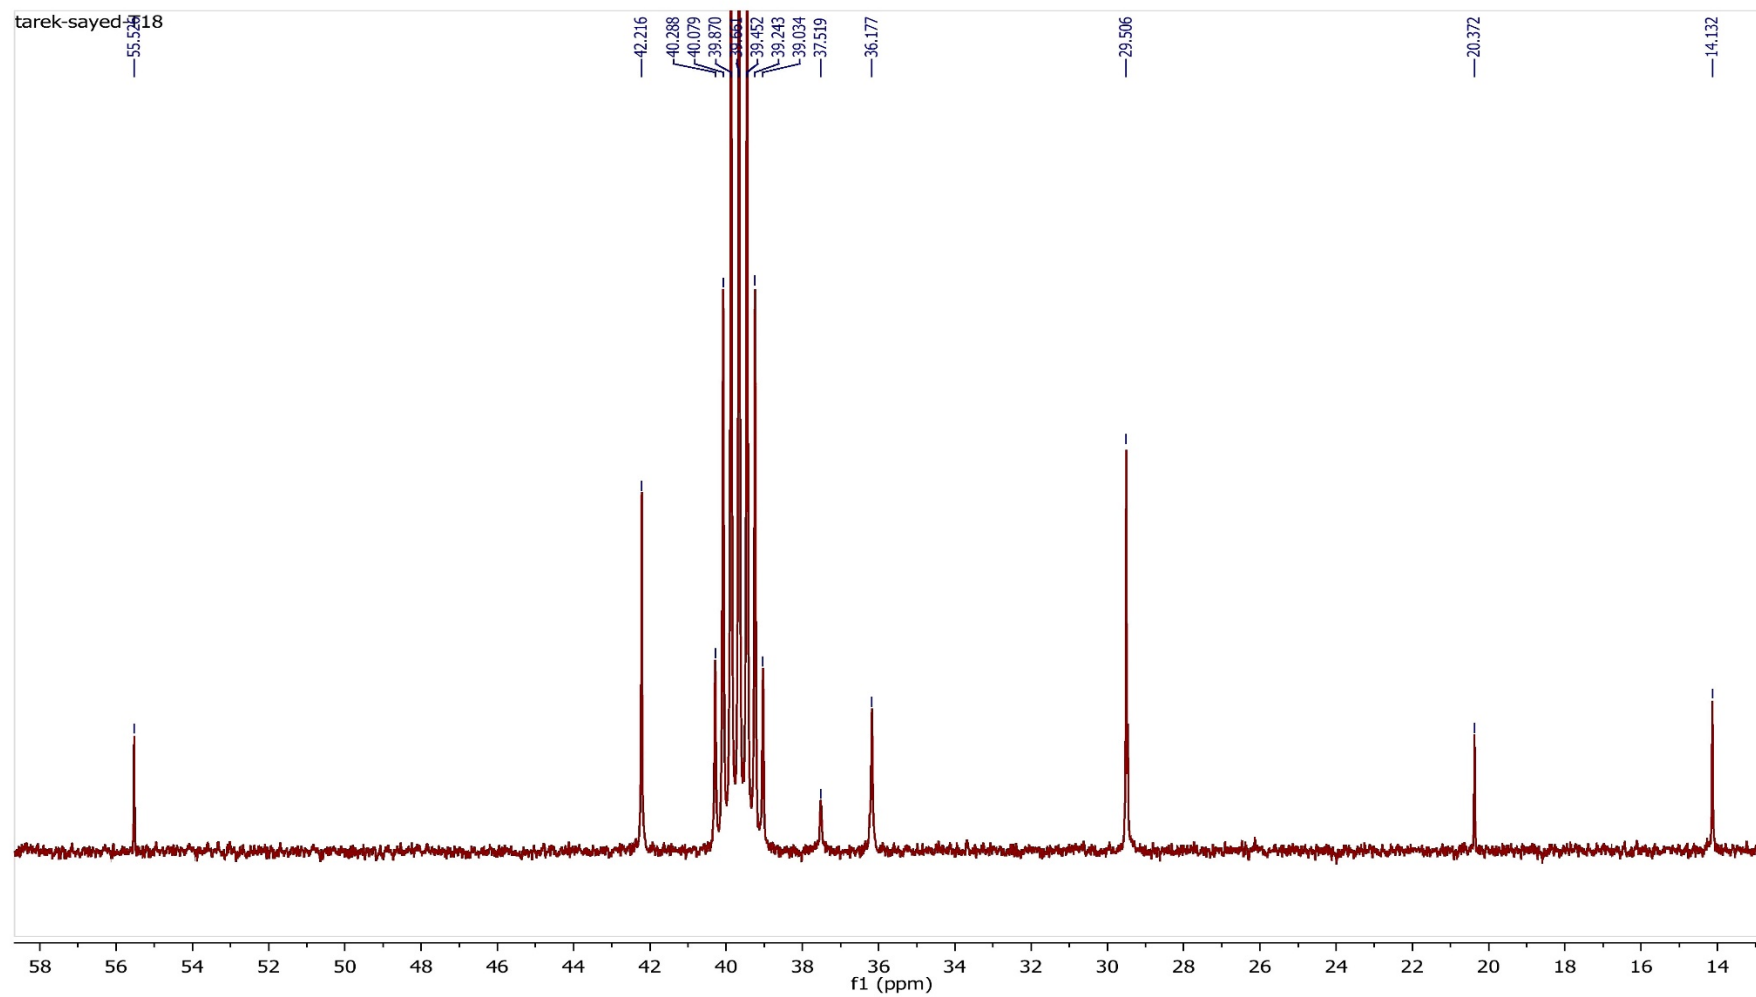

**Figure S64:** The enlargement of upfield region in  $^{13}\text{C}$ -NMR spectrum of compound **5c**.

tarek-T18 #243 RT: 4.08 AV: 1 SB: 2 3.82, 3.53 NL: 2.07E3  
T: (0,0) + e EI Full ms [40.00-1000.00]

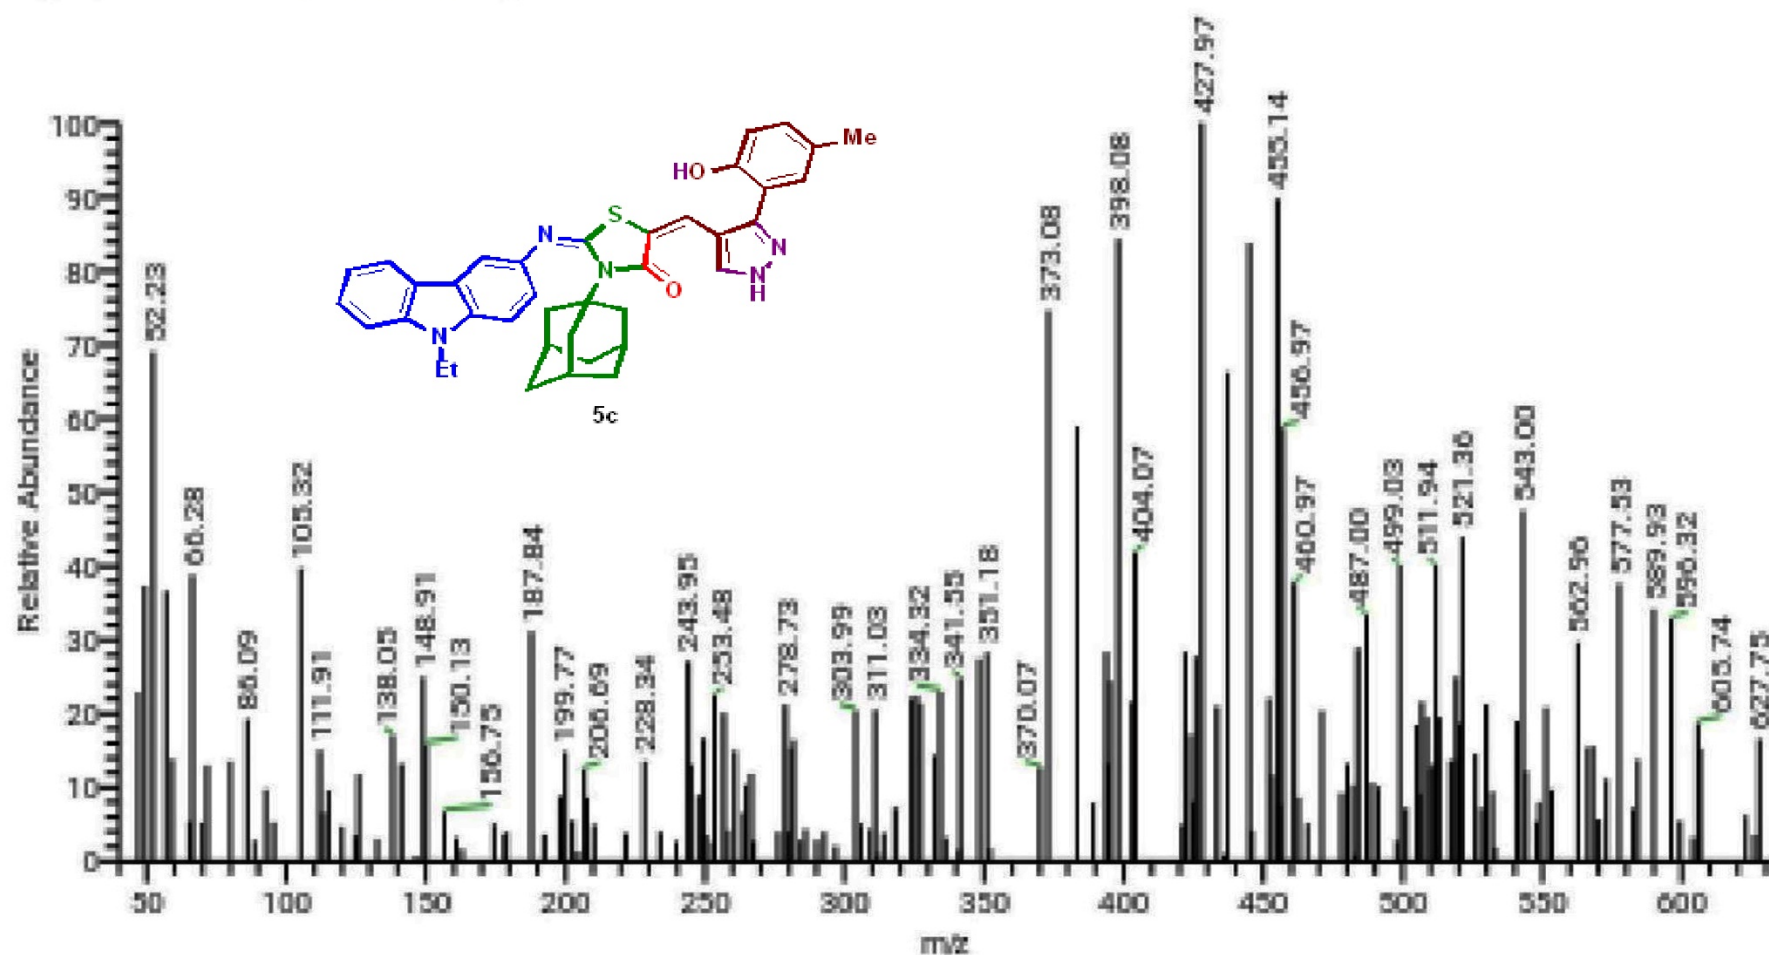

Figure S65: The mass spectrum of compound 5c.

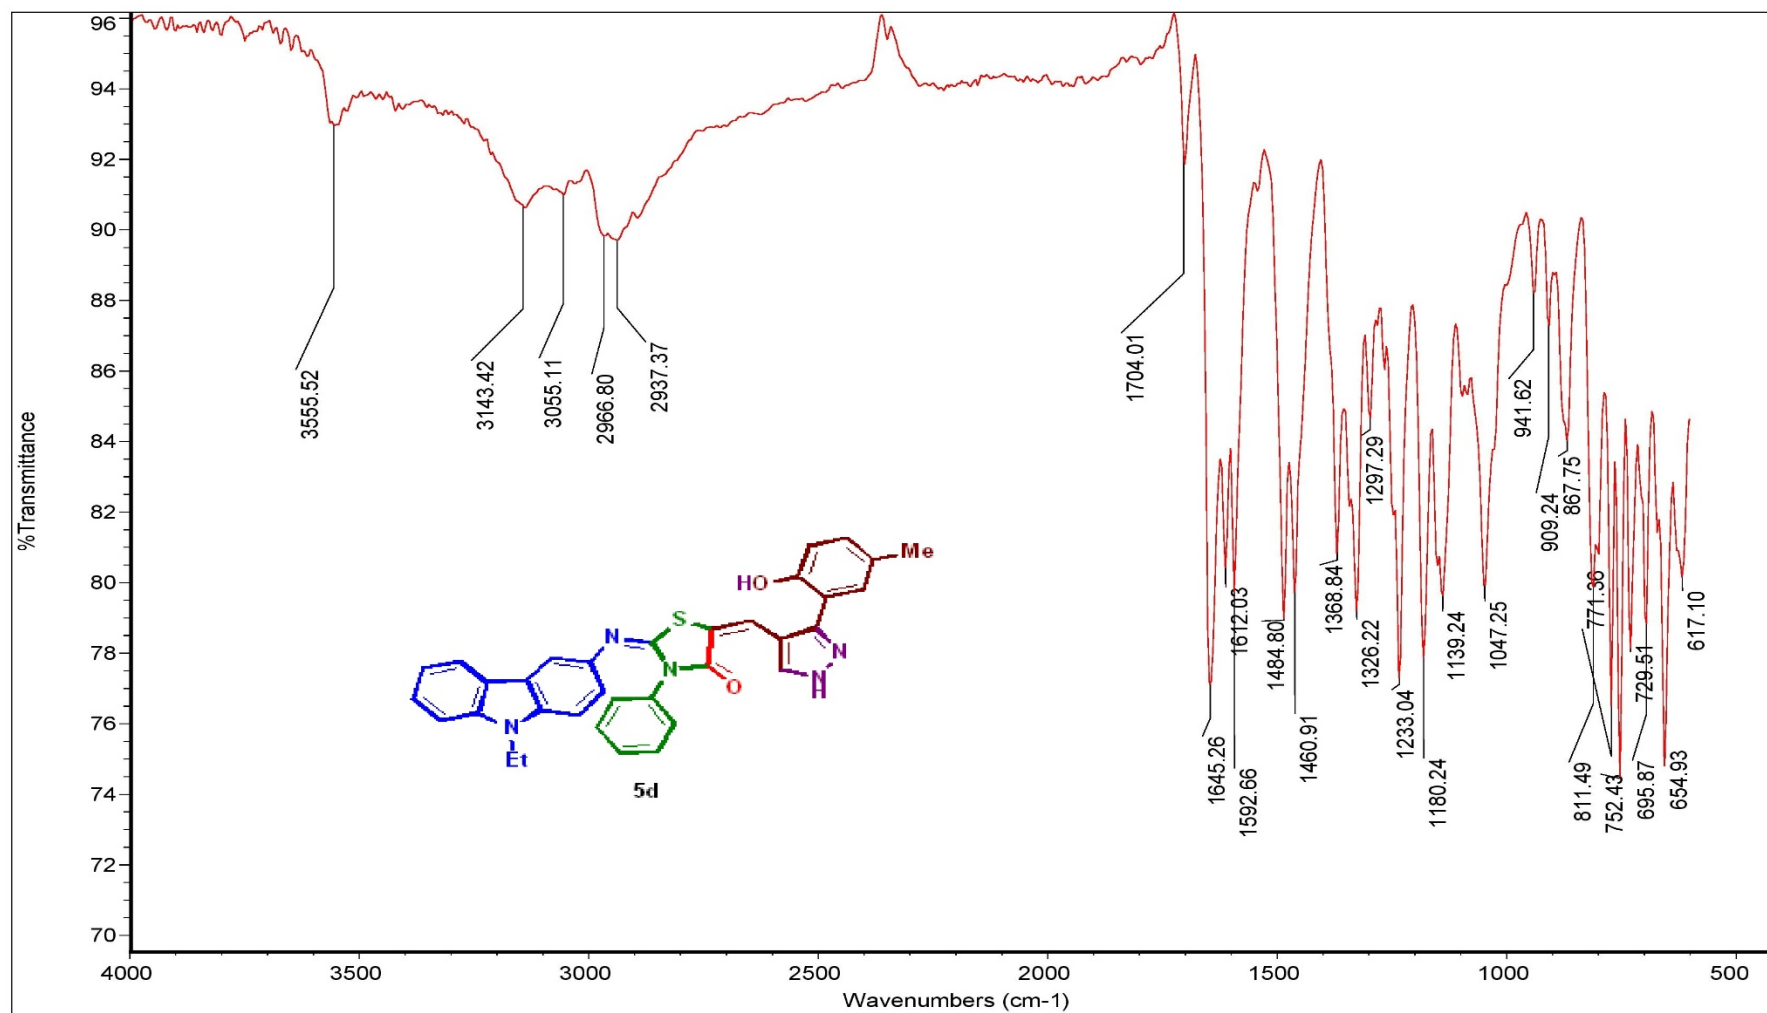

**Figure S66:** The IR spectrum of compound **5d**.

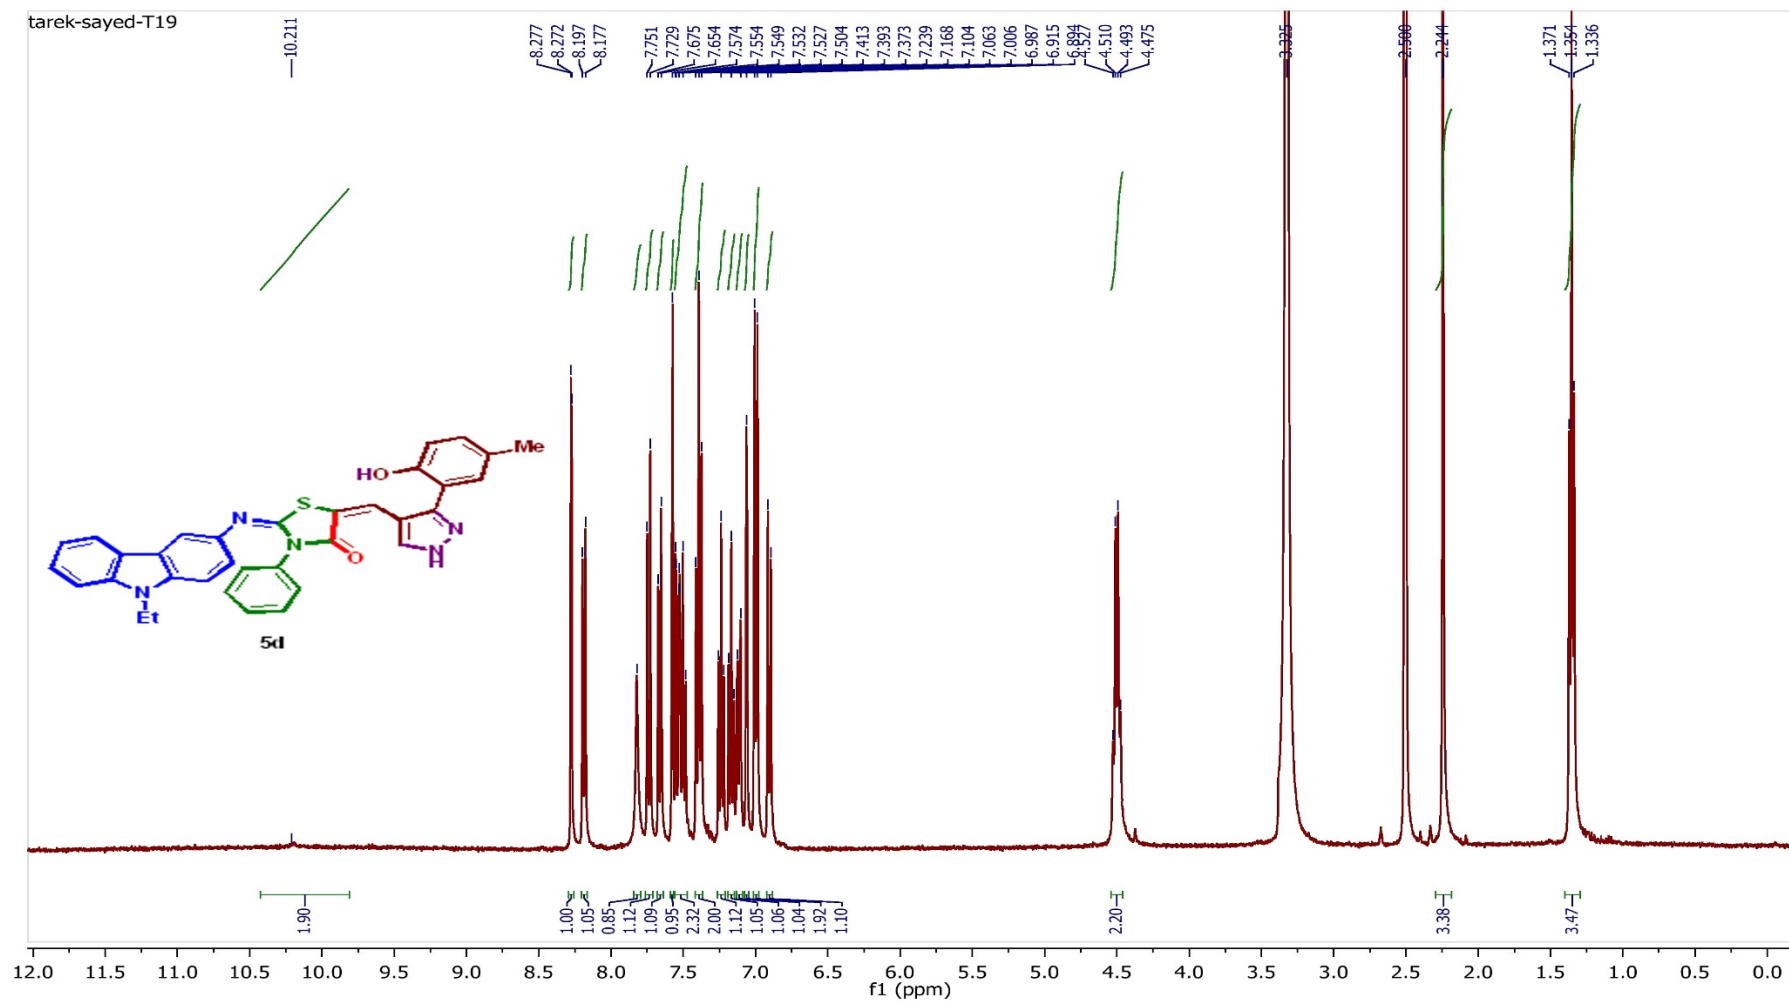

**Figure S67:** The  $^1\text{H}$ -NMR spectrum of compound **5d**.



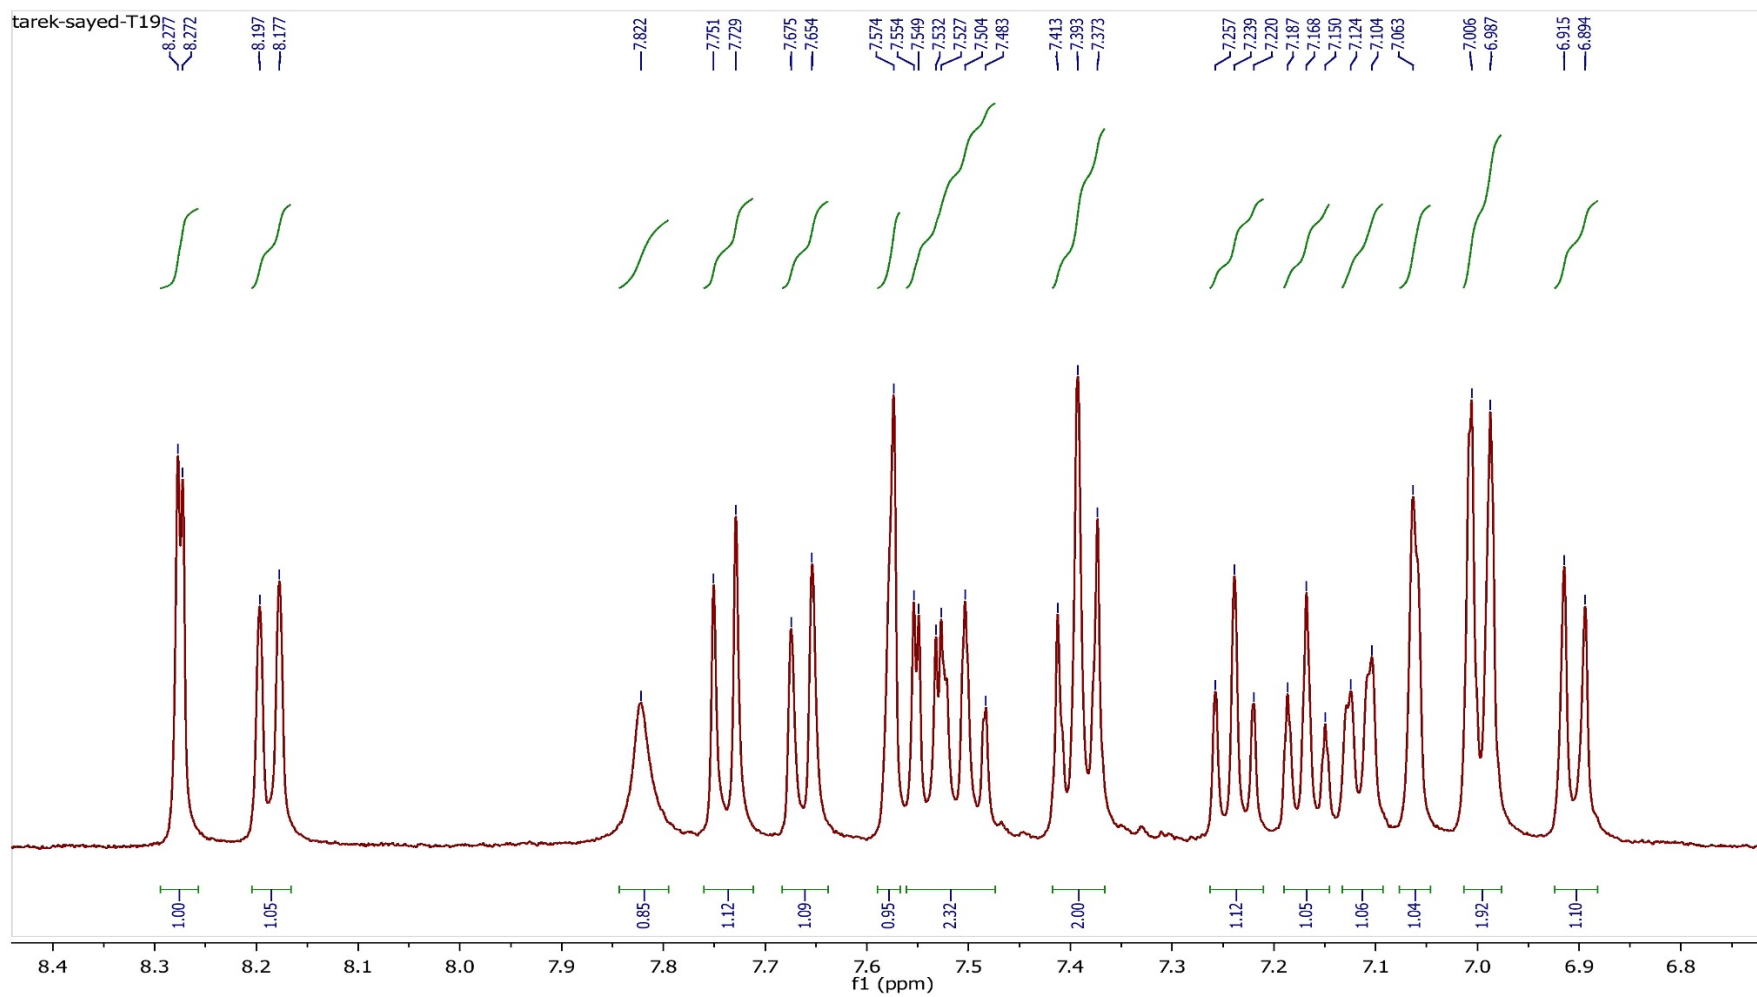

**Figure S68:** The enlargement of downfield region in  $^1\text{H}$ -NMR spectrum of compound **5d**.

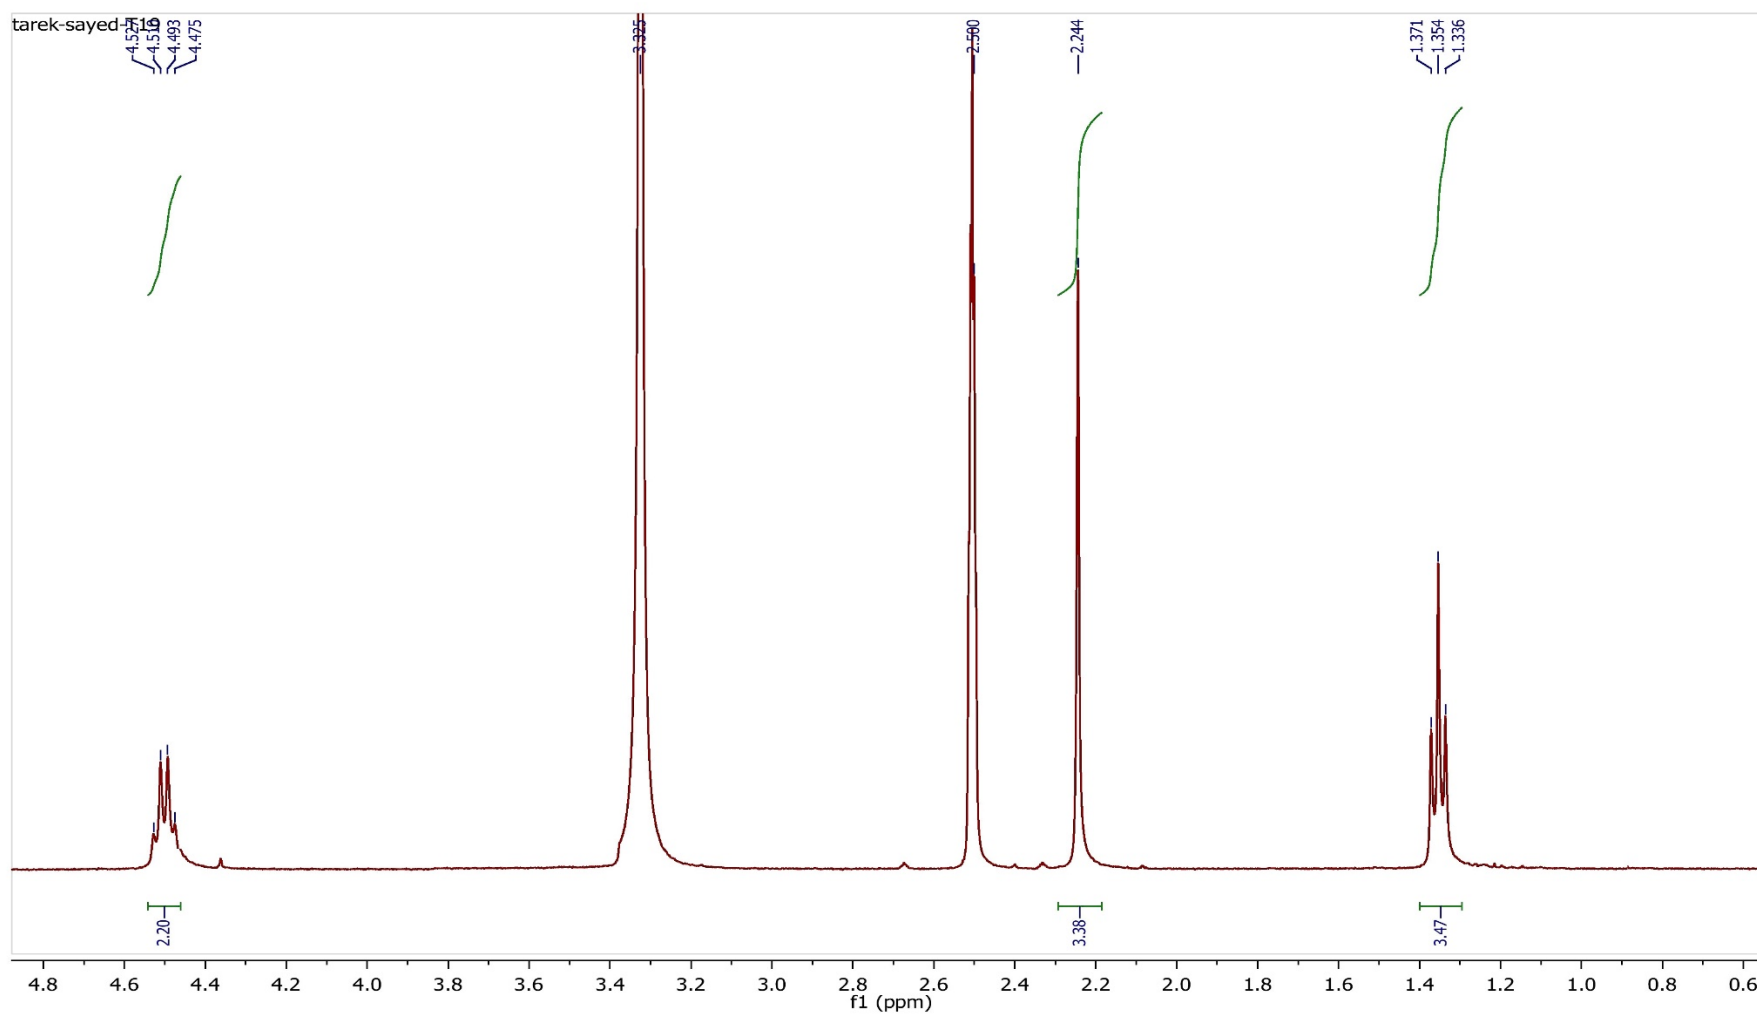

**Figure S69:** The enlargement of upfield region in  $^1\text{H}$ -NMR spectrum of compound **5d**.

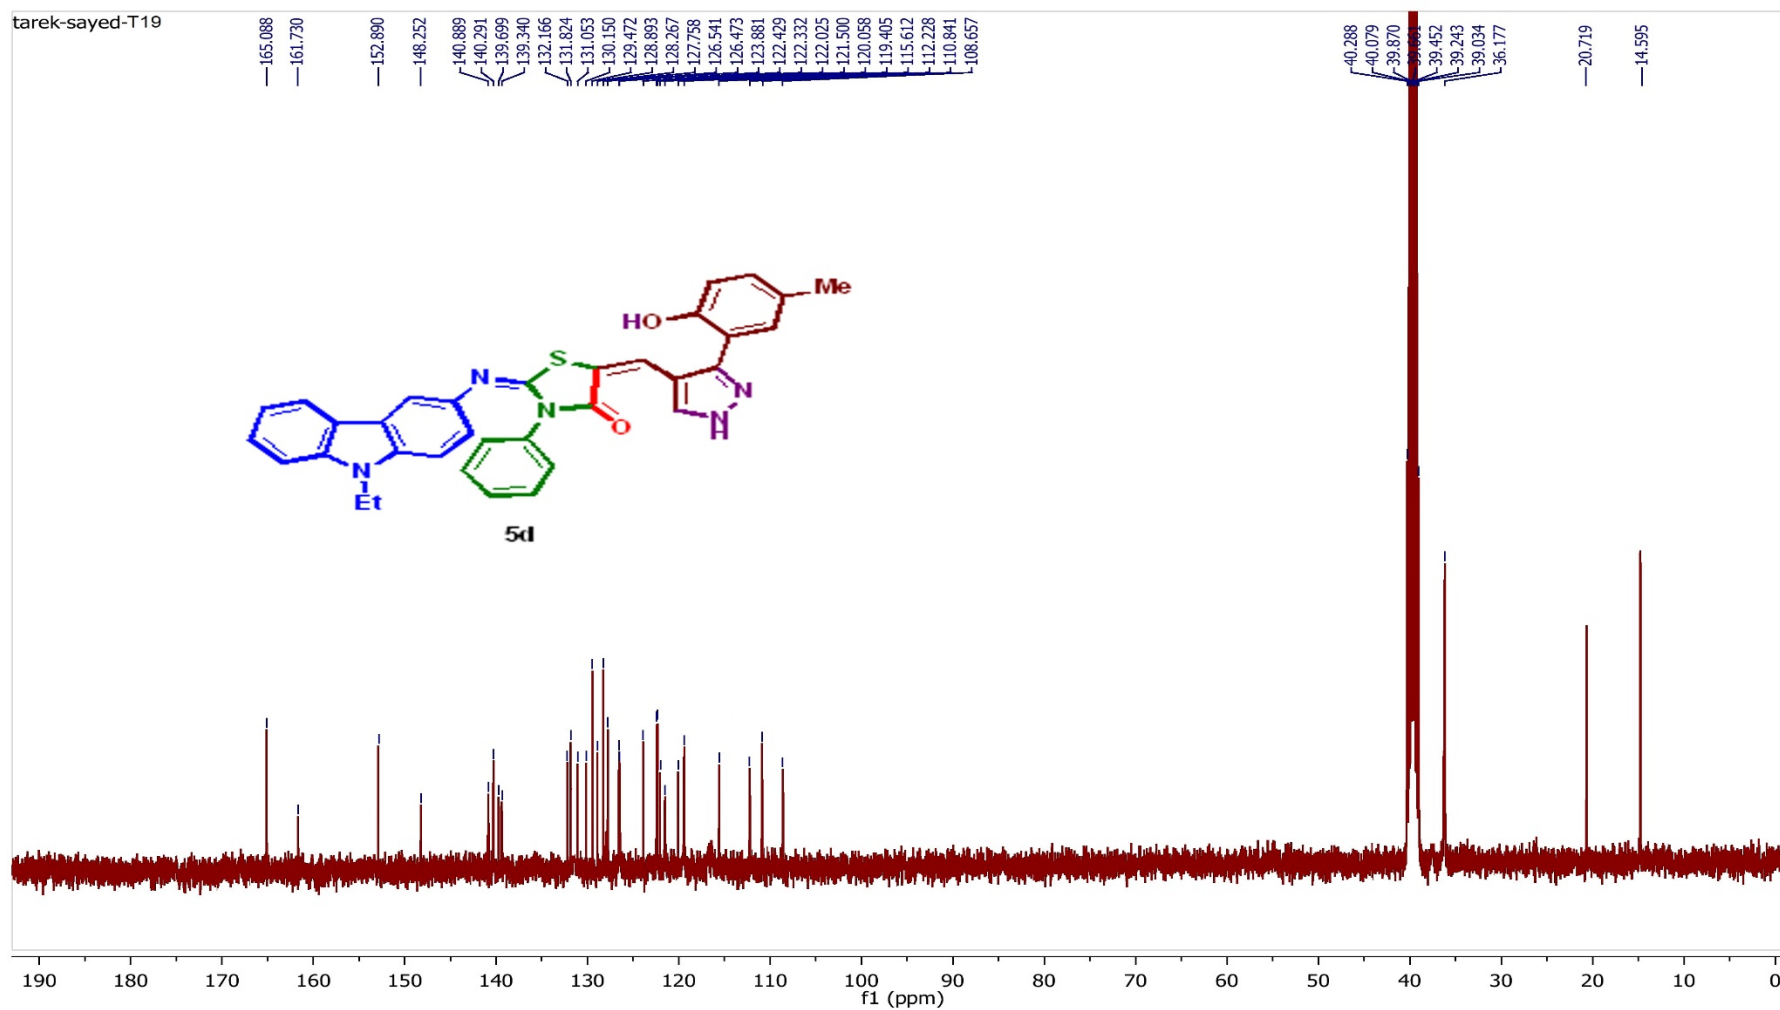

**Figure S70:** The  $^{13}\text{C}$ -NMR spectrum of compound **5d**.

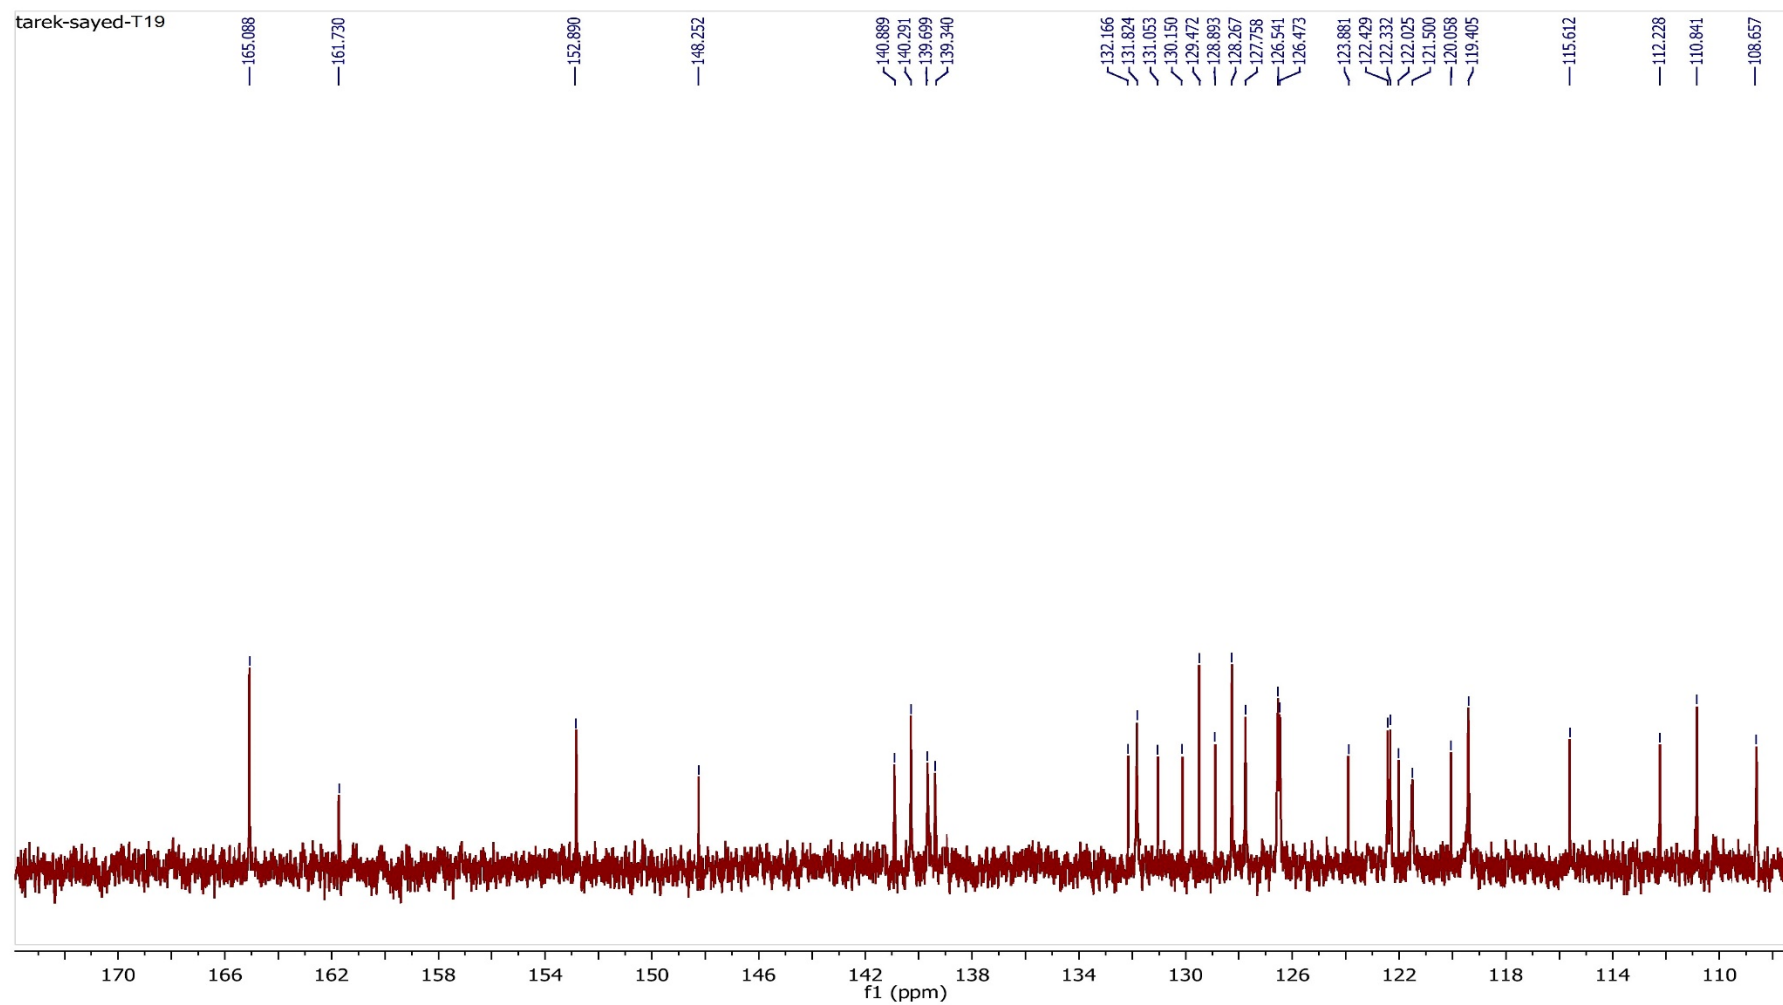

**Figure S71:** The enlargement of downfield region in  $^{13}\text{C}$ -NMR spectrum of compound **5d**.

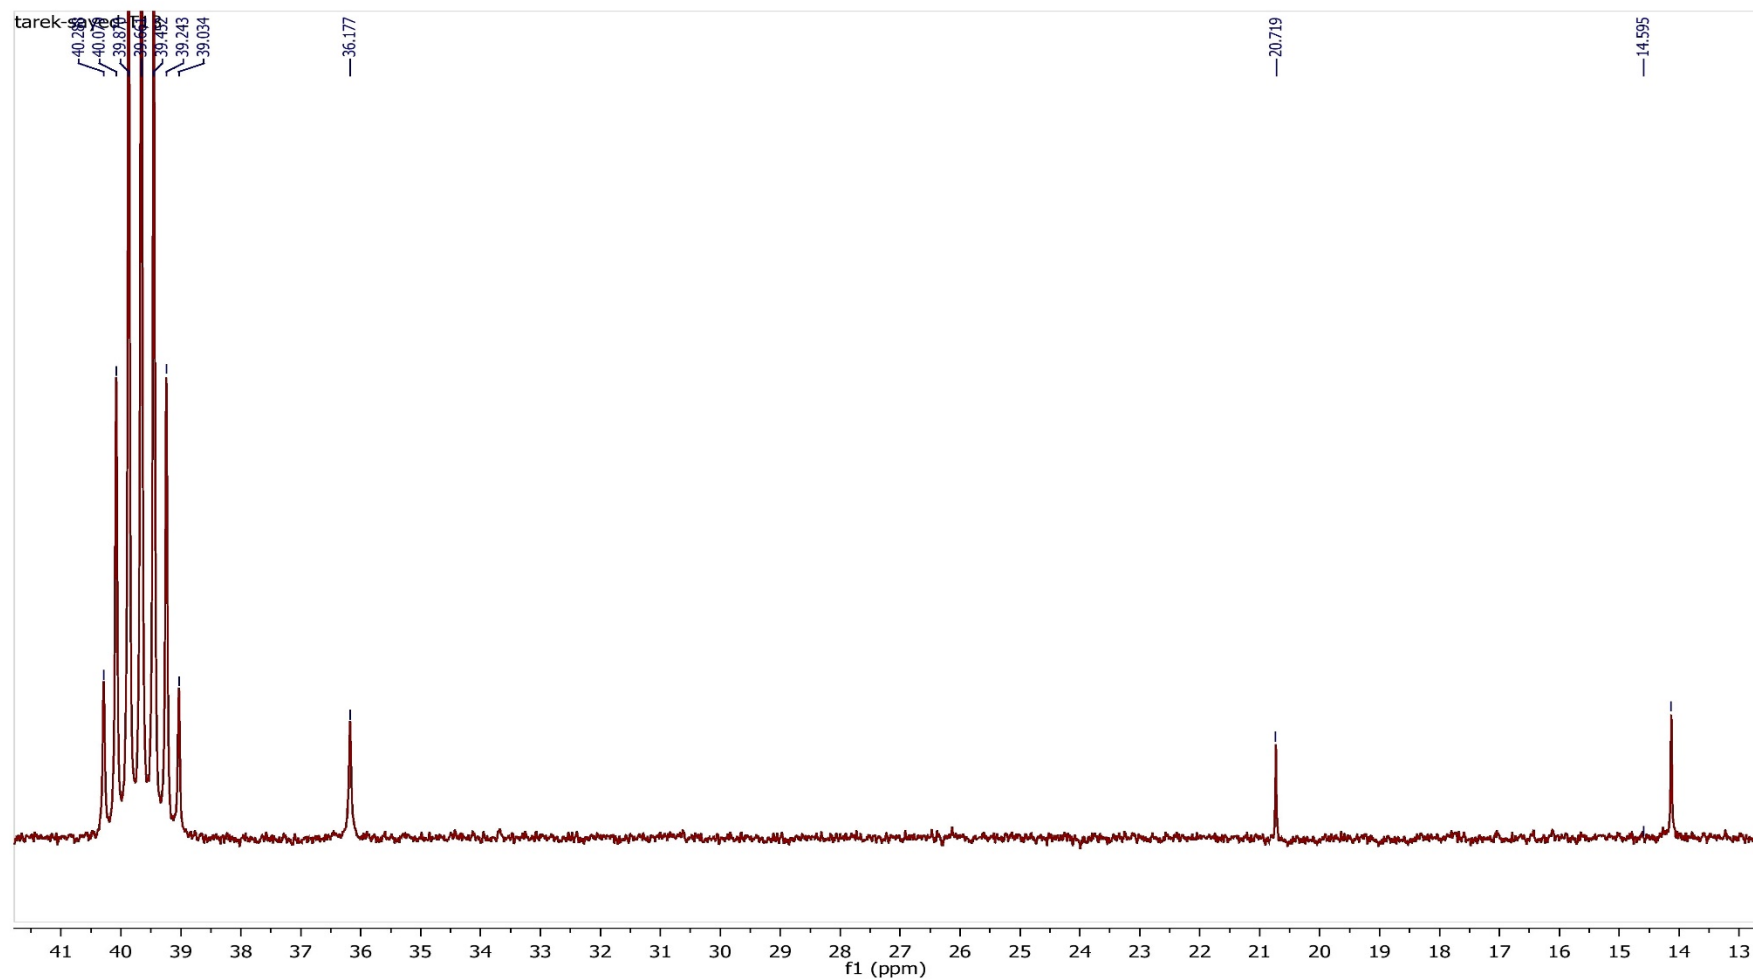

**Figure S72:** The enlargement of upfield region in  $^{13}\text{C}$ -NMR spectrum of compound **5d**.

tarek-T19 #219 RT: 3.68 AV: 1 SB: 2 3.82, 3.53 NL: 3.43E2  
T: (0,0) + e EI Full ms [40.00-1000.00]

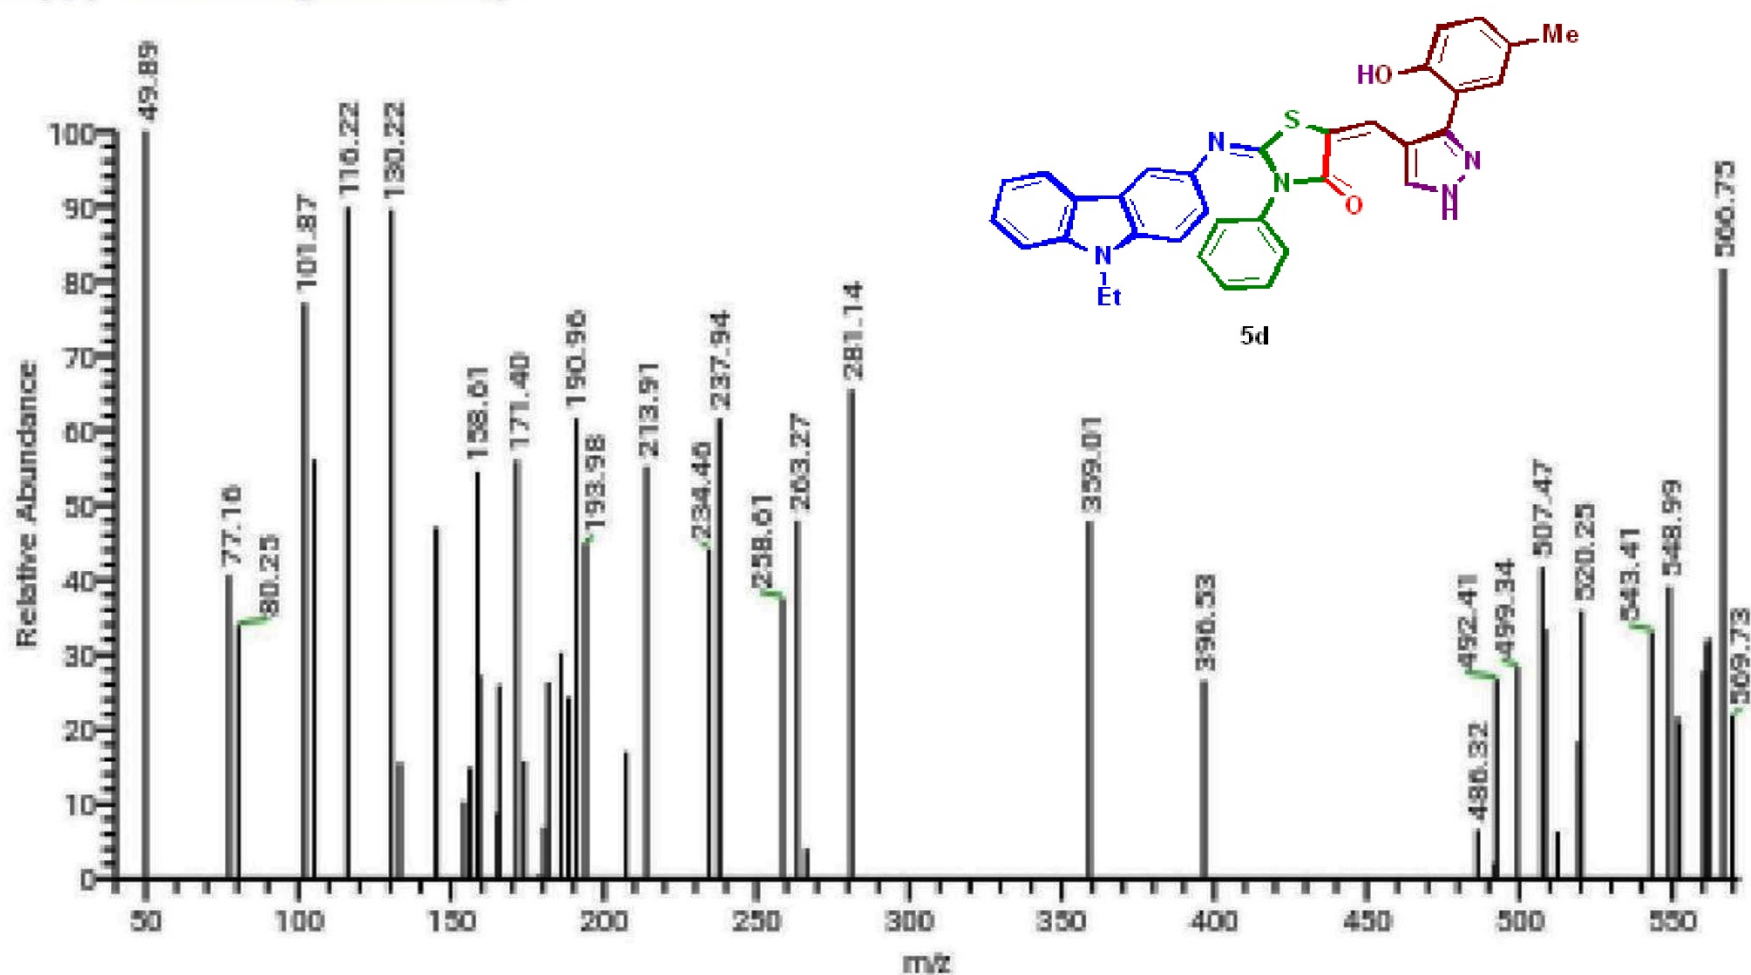

Figure S73: The mass spectrum of compound **5d**.

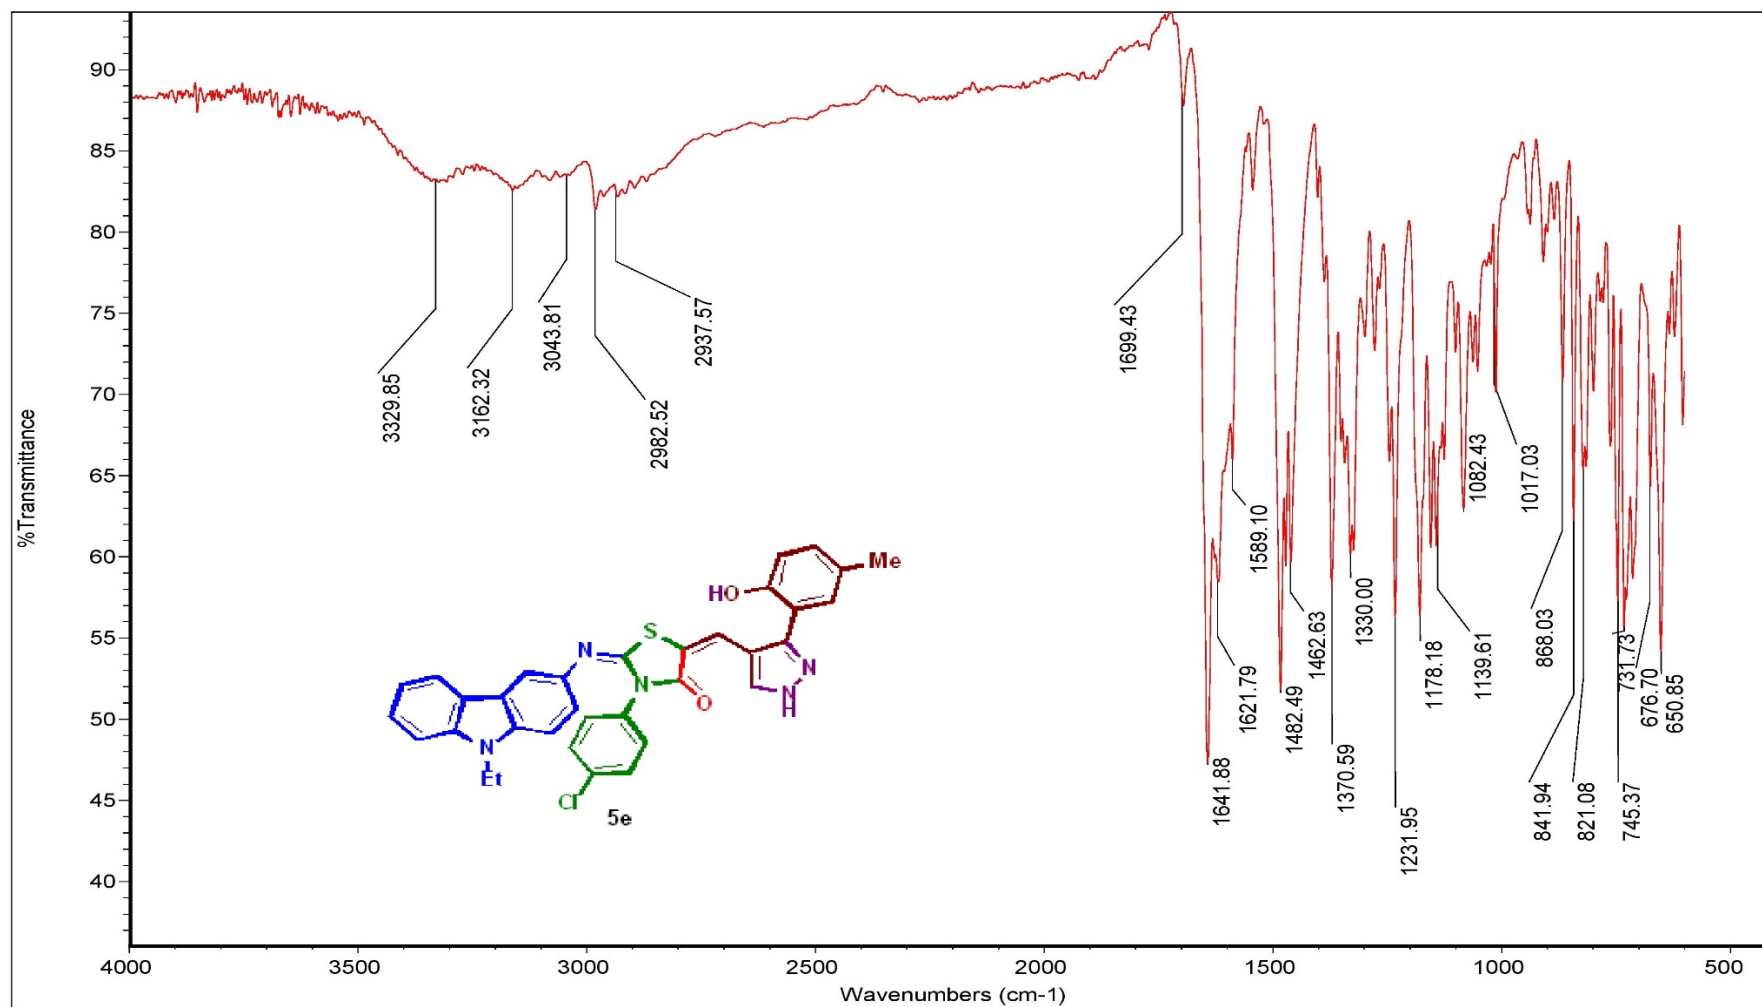

**Figure S74:** The IR spectrum of compound 5e.

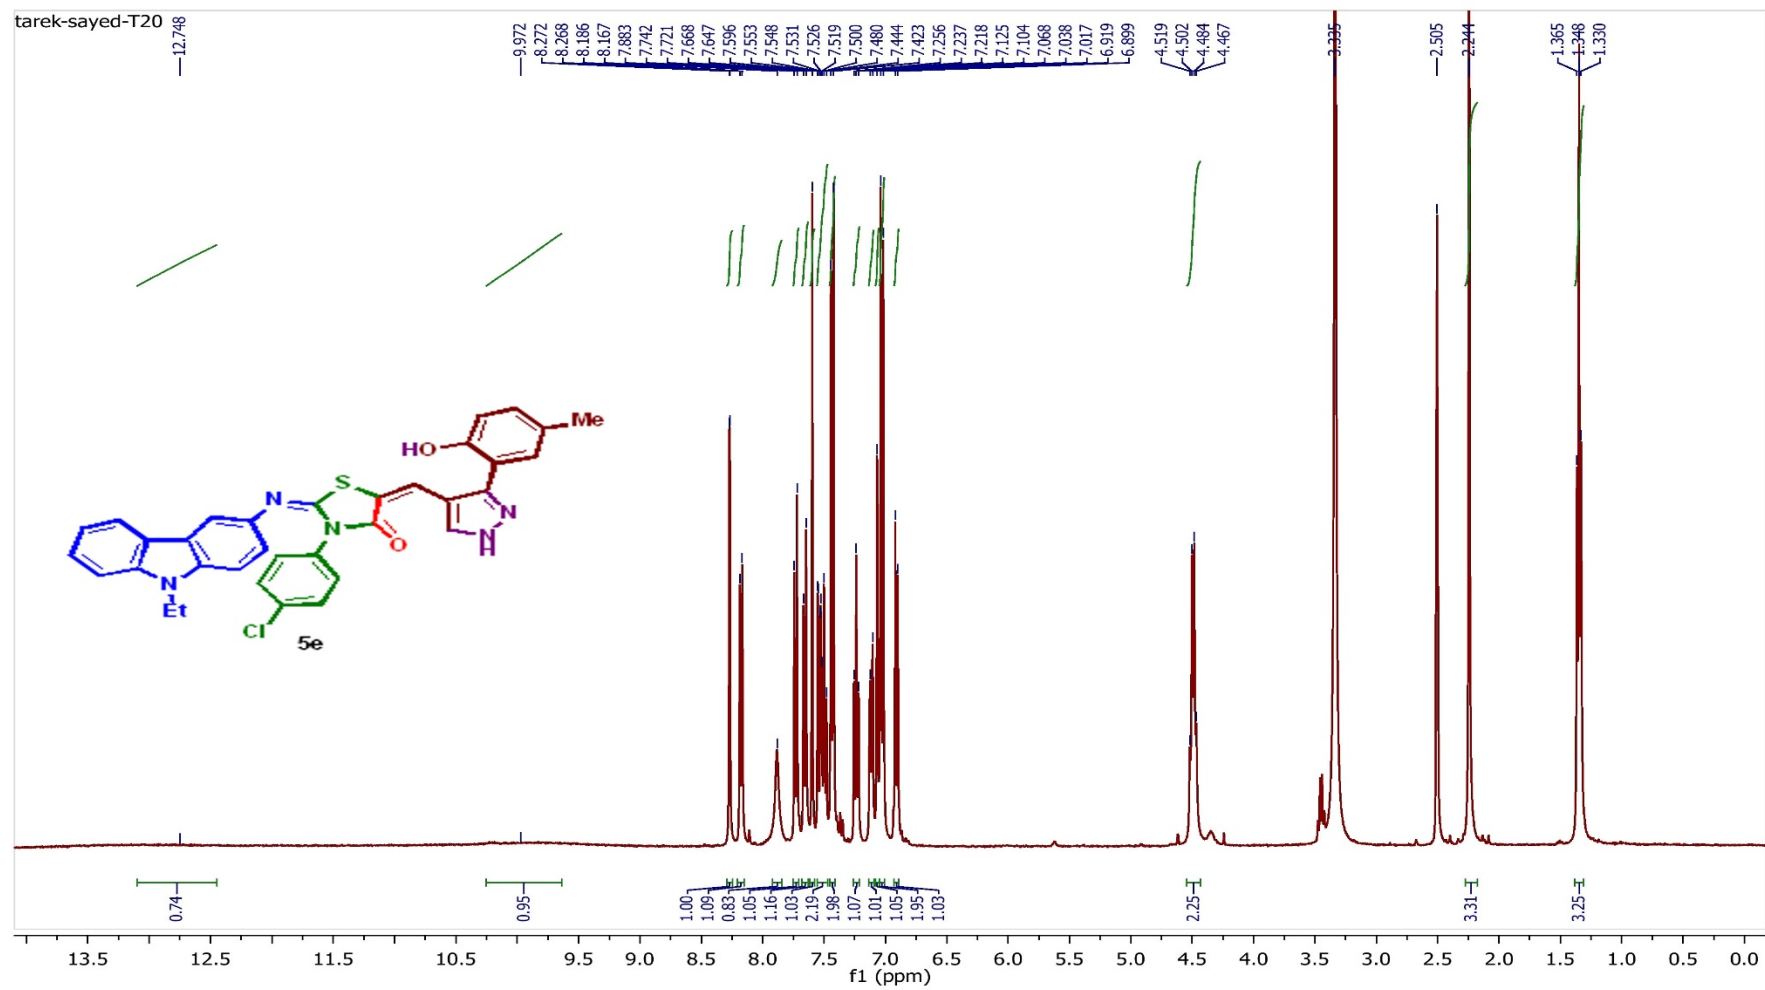

**Figure S75:** The  $^1\text{H}$ -NMR spectrum of compound **5e**.



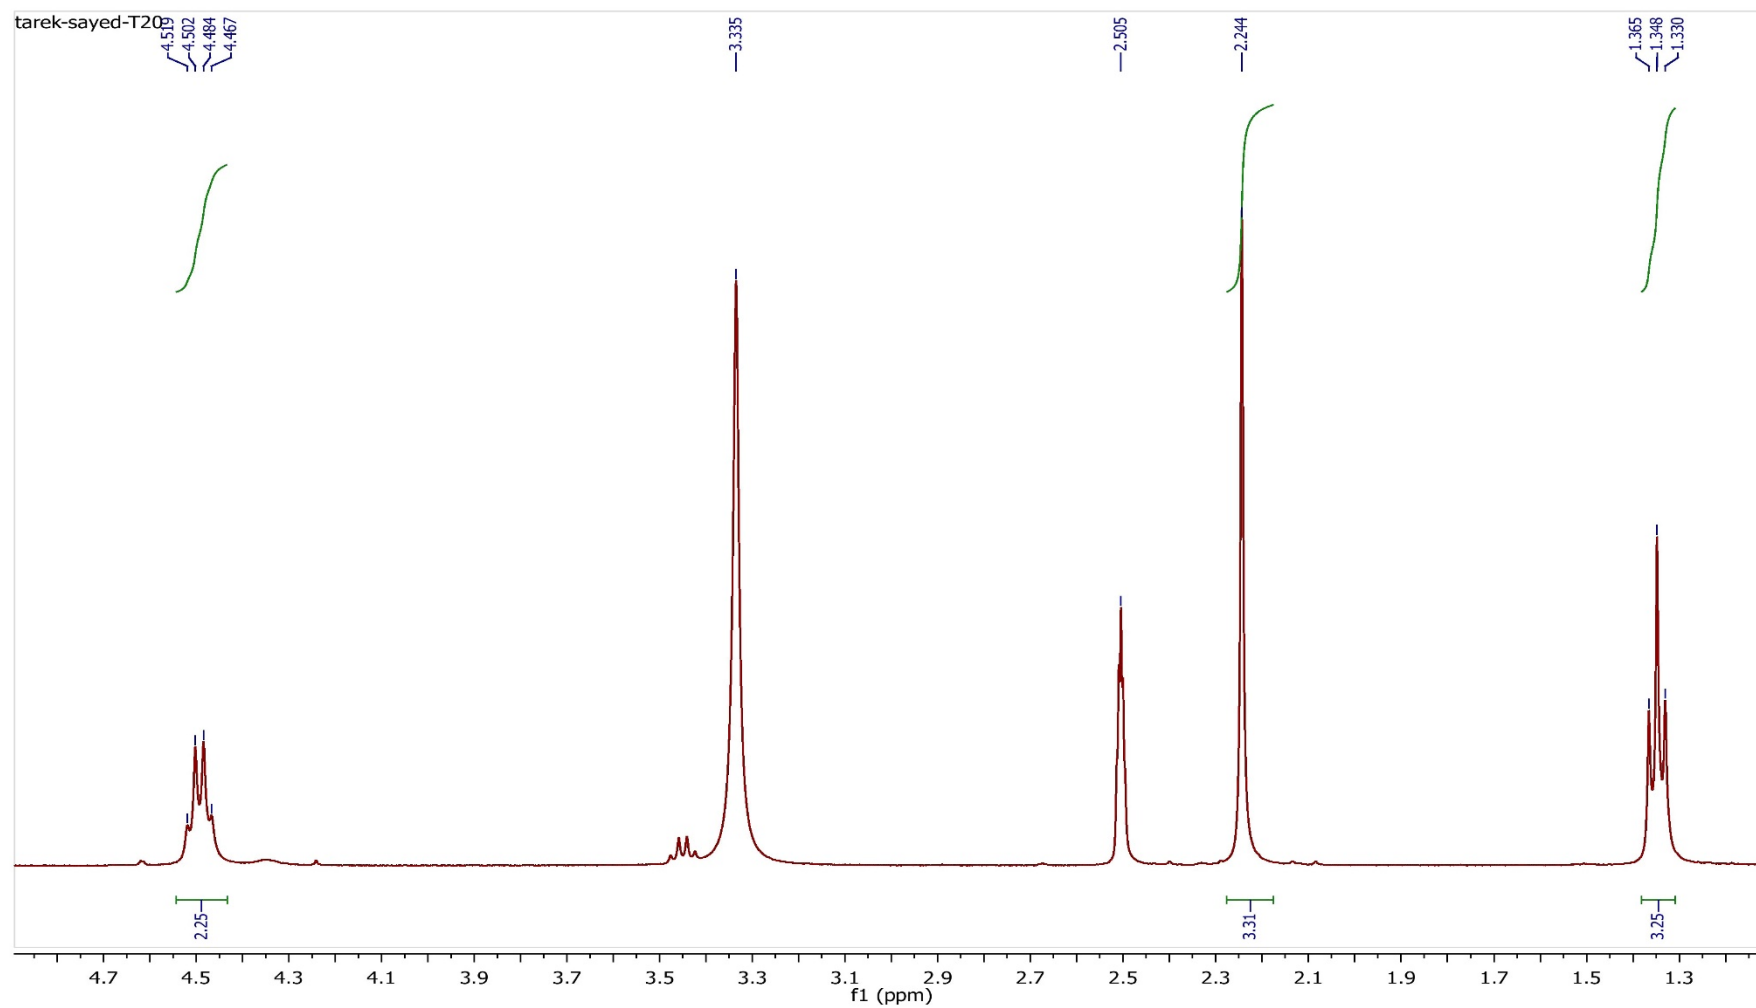

**Figure S76:** The enlargement of upfield region in  $^1\text{H}$ -NMR spectrum of compound **5e**.

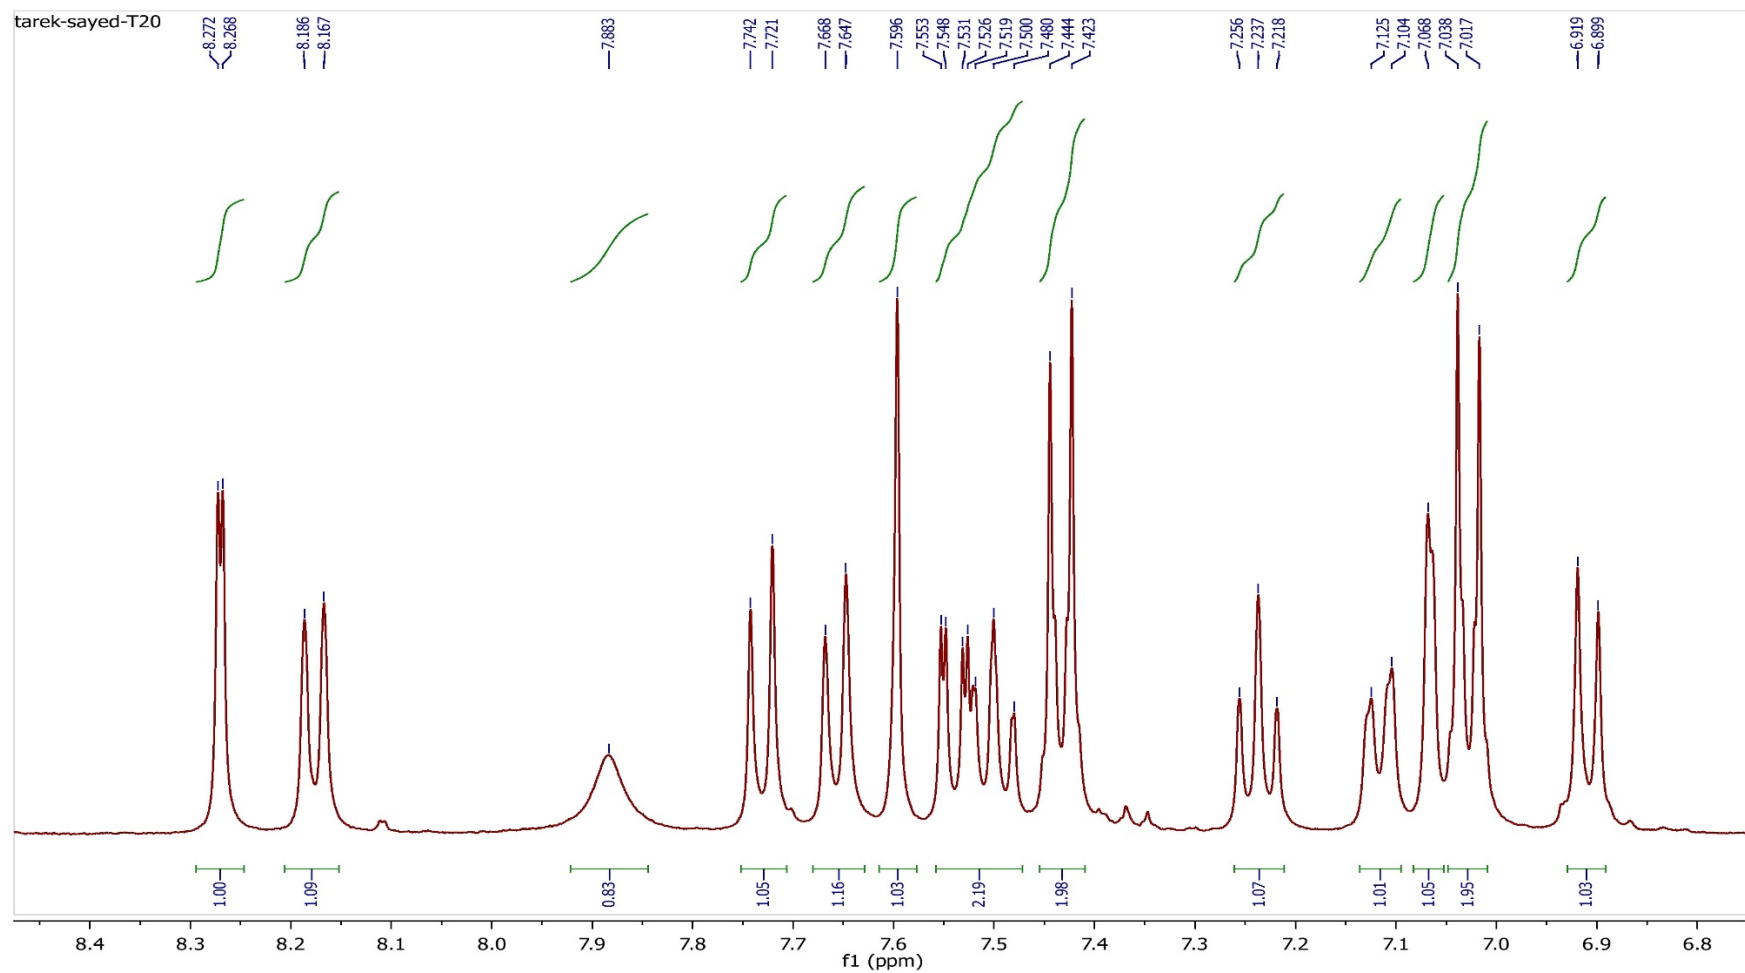

**Figure S77:** The enlargement of downfield region in  $^1\text{H}$ -NMR spectrum of compound **5e**.

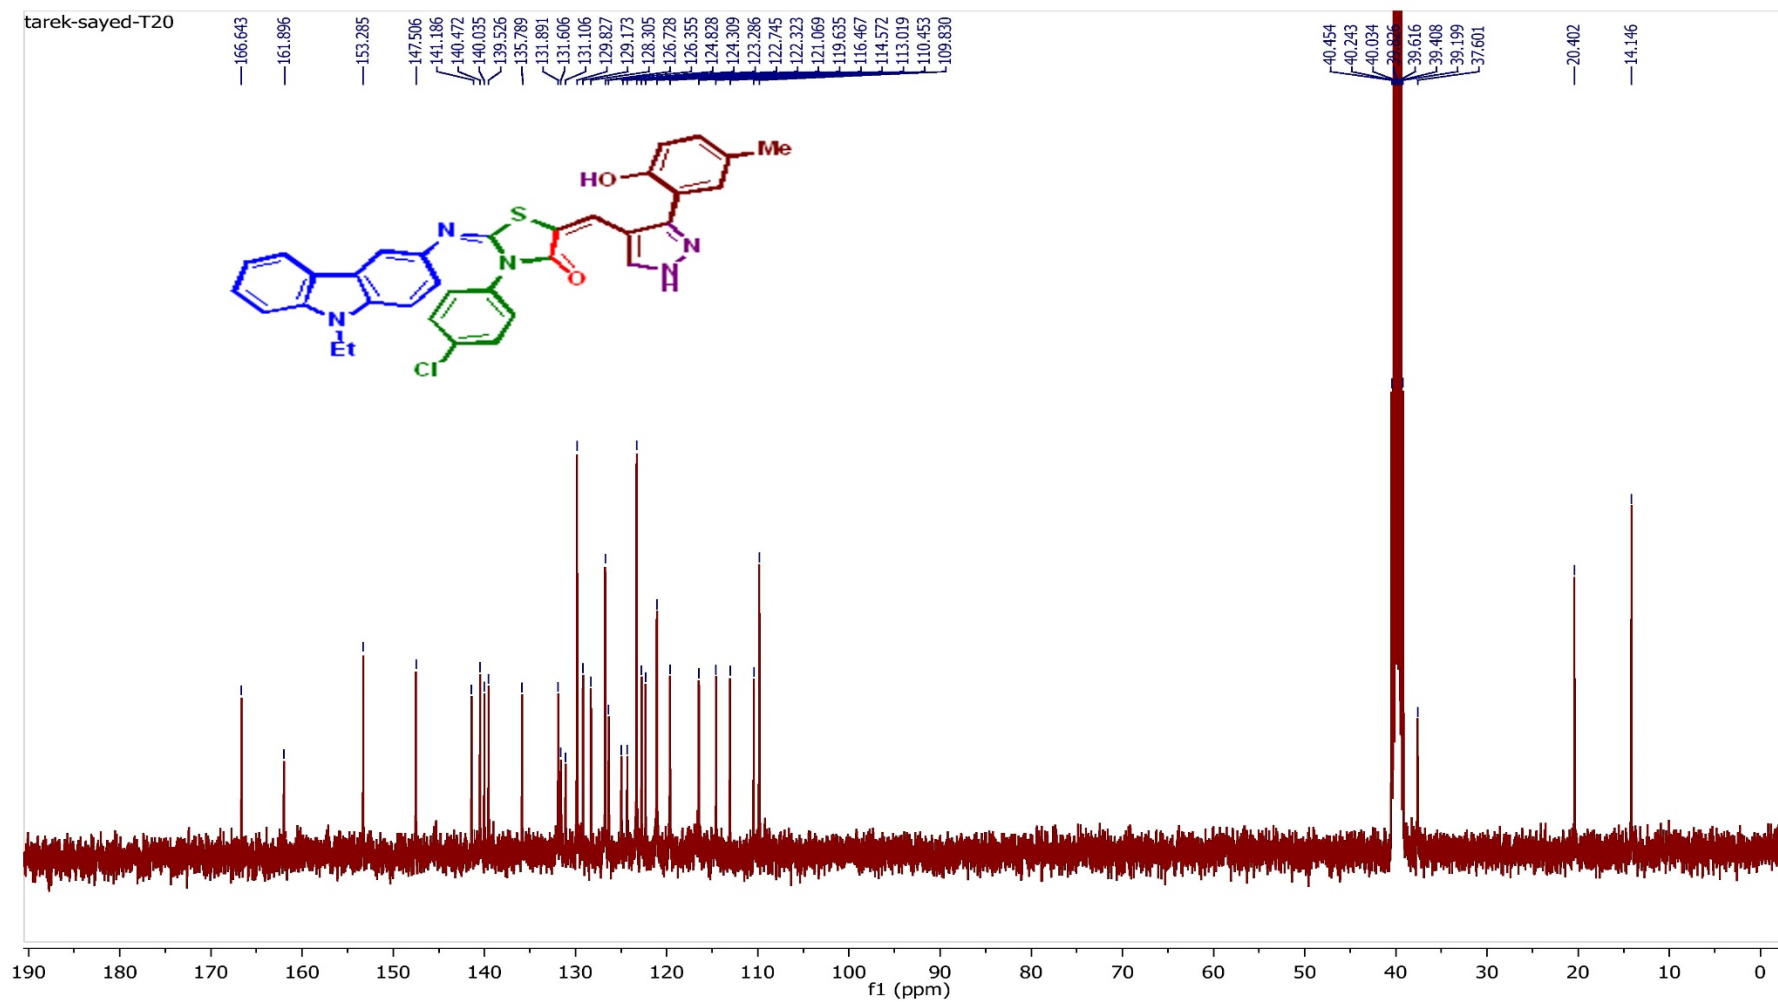

**Figure S78:** The  $^{13}\text{C}$ -NMR spectrum of compound **5e**.

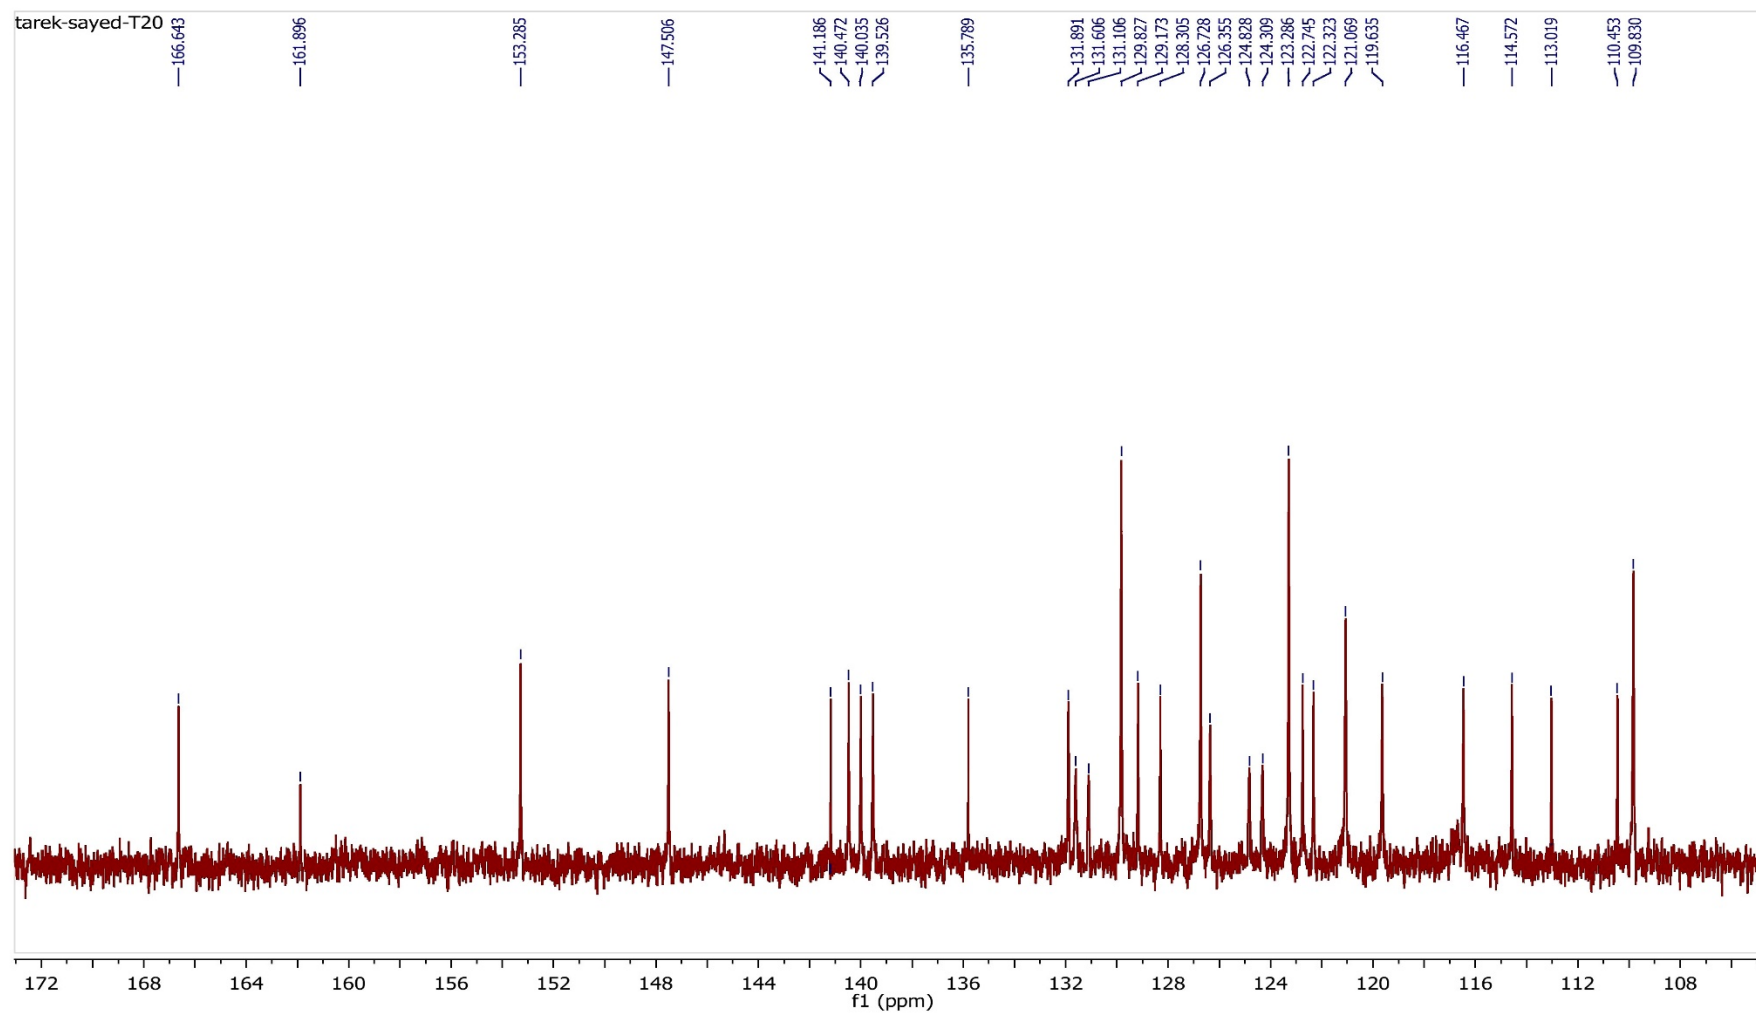

**Figure S79:** The enlargement of downfield region in  $^{13}\text{C}$ -NMR spectrum of compound **5e**.

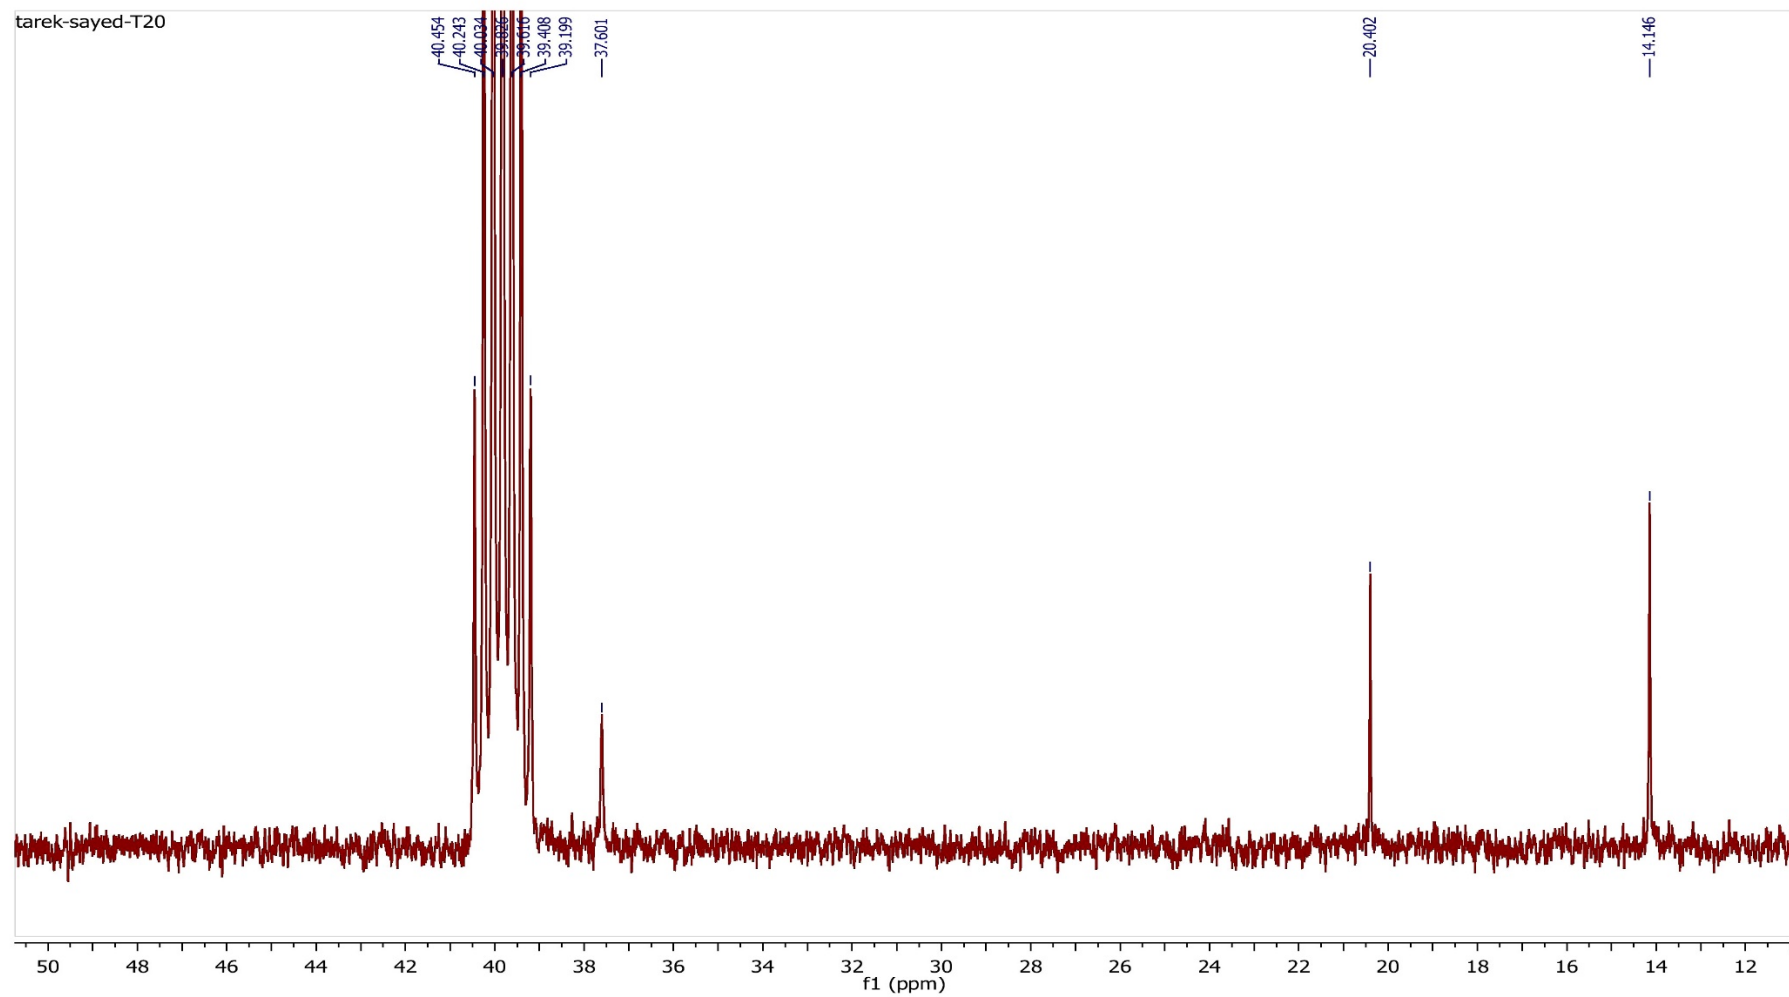

**Figure S80:** The enlargement of upfield region in  $^{13}\text{C}$ -NMR spectrum of compound **5e**.

tarek-T20 #57-59 RT: 0.97-1.00 AV: 3 SB: 2 3.82, 3.53 NL: 1.77E2

T: (0,0) + e EI Full ms [40.00-1000.00]

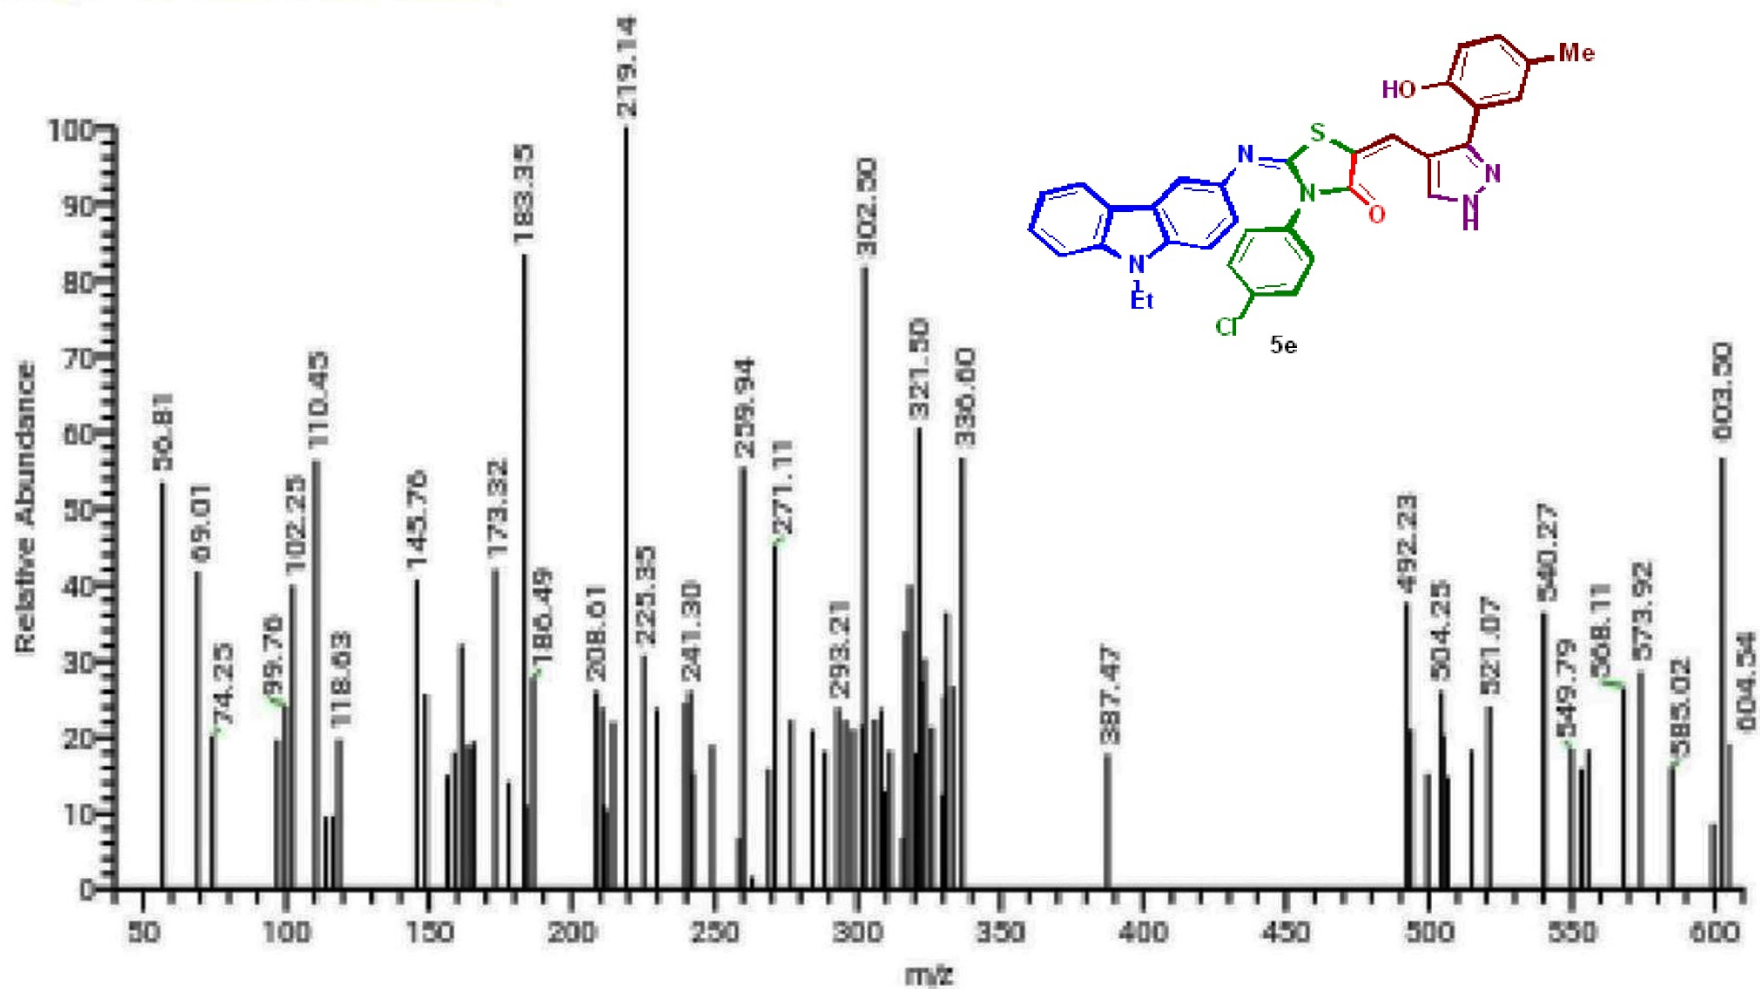

Figure S81: The mass spectrum of compound 5e.
